# Supplementary material for: Clinical and perinatal outcomes of fresh single-blastocyst-transfer cycles under an early follicular phase prolonged protocol according to day of trigger estradiol levels
Source: PeerJ. 2021 Jul 26;9:e11785. doi: 10.7717/peerj.11785 (PMC8320517; doi:10.7717/peerj.11785)
Supplement: Supplemental Information 1 [file peerj-09-11785-s001.xlsx]

## Sheet: full data
Group（1=<25th 212-1677; 2= 25-50th 1680-2380; 3=51-75th 2407-3028; 4=>75th 3036-6526 ）	Basic information of patients														COH procedure													Laboratory results																		clinical outcomes
	ART Time	Actual COH protocol	ID	female age	male age	BMI	primary/secondary（primary=0，secondary=1）	Duration of infertility（ys）	Cause of infertility(female=1,male=2, both=3 unkown=4)	Endometriosis(1=Yes 0=No)	PCOS(1=Yes 0=No）	D3 LH	D3 FSH	D3 E2	LH at Launch day	E2 at Launch day	P at Launch day	AFC at Launch day	LH at the trigger day	E2 at the trigger day	E2 level per every follicle	P4 level at the trigger day	Endometrial thickness（mm）	Gn dose at the start day	ovary cyst before Gn（Yes=1 No=0）	Gn days	total Gn days	Fertilization type (IVF=1, ICSI=2, 0=HALF)	Number of eggs retrieved	2PN number	Number of blastomeres	D3 embryos	D3 embryos of good quality（7-9cells, A-B degree）	D3 superior embryo rate	Number of D3 embryo culture sacs	D5 or D6 blastocysts (n)	Blastocyst formation rate	Number of good quality blastocysts (≥4BB)	Number of fresh embryo transfer	Days of embryo transfer	A detailed review of blastocyst	Blastocyst cavity expansion	Inner cell mass grade in blastocyst	Trophoblast level of blastocyst	Embryo grade（1=I, 2=II, 3=III）	Number of embryos implanted（pregnancy sac）	clinical pregnancy（clinical=1，Biochemical(hcg＞10)=2）	ongoing pregnancy（ongoing=1(≥12 weeks)，No=0）	early abortion（＜12 weeks）1=Yes, 0=No
1	2018-07-20 14:47:00	prolonged protocol	28295	26	28	19.56	0	4	2	0	0	2.73	7.35	37.56	0.19	16	0.59	11	0.11	212	26.5	0.88	10	225	0	12	2550	1	8	7	7	8	2	0.25	8	5	0.625	1	1	5	4BB	4	B	B	1	1	1	1	0
1	2018-07-28 10:20:00	prolonged protocol	28423	33	40	22.86	1	7	1	0	0	4.73	7.25	42.97	0.51	32	0.6	18	0.15	231	57.75	0.48	9	225	0	9	2025	1	4	3	3	3	2	0.666667	3	2	0.666667	2	1	5	5BB	5	B	B	1	1	1	0	1
1	2018-07-13 11:09:00	prolonged protocol	28165	32	33	17.22	0	6	2	0	0	3.71	7.45	72.8	0.36	28	0.73	8	0.28	276	30.6667	0.34	10.8	225	0	10	2275	0	9	4	3	3	1	0.333333	3	1	0.333333	1	1	5	4AB	4	A	B	1	0	2	0	0
1	2018-08-29 09:29:00	prolonged protocol	26633	30	34	22.15	0	5	2	0	0	1.1	7.8	53.16	0.07	12	0.48	20	0.07	281	25.5455	0.38	10	150	0	7	1050	1	11	10	10	10	2	0.2	10	2	0.2	2	1	5	4AB	4	A	B	1	1	1	1	0
1	2017-04-28 08:54:00	prolonged protocol	21020	25	30	19.14	0	3	1	0	0	5	8.04	81.86	0.45	51	2.24	18	0.22	296	19.7333	0.78	16.8	150	0	10	1500	1	15	11	10	10	4	0.4	10	7	0.7	3	1	5	4AB	4	A	B	1	1	1	1	0
1	2018-05-30 09:19:00	prolonged protocol	27204	31	35	22.86	0	1	1	1	0	2.7	9.18	60.26	0.21	20	0.51	5	0.07	333	83.25	0.21	12.3	225	0	10	2625	1	4	4	4	4	3	0.75	4	4	1	3	1	5	4BB	4	B	B	1	1	1	1	0
1	2018-07-12 15:18:00	prolonged protocol	28148	30	28	24.22	1	1	1	0	0	3.74	3.69	53.1	0.17	20	0.46	11	0.18	348	87	0.49	7.7	300	0	11	3375	1	4	3	3	3	1	0.333333	3	2	0.666667	2	1	5	4AB	4	A	B	1	0	2	0	0
1	2018-07-10 09:13:00	prolonged protocol	4783	39	43	27.55	1	4	2	0	0	3.73	6.71	49.23	0.11	33	0.31	25	0.12	380	42.2222	0.33	18.7	262.5	0	12	3675	1	9	8	7	7	0	0	7	3	0.428571	2	1	5	4BA	4	B	A	2	1	1	0	1
1	2018-09-18 11:25:00	prolonged protocol	29291	30	35	26.64	0	2	1	0	0	8.18	8.88	36.84	1.17	20	0.39	12	3.11	384	54.8571	0.21	13.8	200	0	10	2100	1	7	5	5	5	3	0.6	5	4	0.8	0	1	5	4AC	4	A	C	1	1	1	1	0
1	2017-12-08 09:32:00	prolonged protocol	24581	29	37	21.5	1	1	1	0	1	4.11	5.28	42.85	0.07	37	0.49	26	0.15	386	29.6923	0.26	10.9	150	0	12	2175	1	13	13	13	13	4	0.307692	13	6	0.461538	6	1	5	4BA	4	B	A	1	1	1	1	0
1	2018-06-30 11:16:00	prolonged protocol	27891	35	38	22.44	1	2	1	0	0	12.09	5.11	47.99	0.17	24	0.24	6	0.41	392	130.667	0.33	14.7	225	0	12	2850	1	3	3	3	3	3	1	3	3	1	2	1	5	4BB	4	B	B	1	1	1	1	0
1	2018-07-02 09:32:00	prolonged protocol	27902	29	35	21.08	0	4	2	0	0	6.39	6.8	84.45	0.34	12	0.31	11	0.16	404	50.5	0.46	11.9	300	0	10	3000	1	8	6	6	7	5	0.714286	7	3	0.428571	0	1	5	3AB	3	A	B	1	1	1	1	0
1	2018-08-06 08:52:00	prolonged protocol	28571	30	30	18.82	0	5	2	0	1	20.77	10.4	35.99	0.32	16	0.31	24	0.12	429	42.9	0.21	10.5	112.5	0	12	1275	1	10	5	5	6	1	0.166667	6	4	0.666667	4	1	5	4AB	4	A	B	1	1	1	1	0
1	2017-11-16 09:41:00	prolonged protocol	24293	35	39	24.03	1	1	4	0	0	3.15	8.68	41.37	0.51	12	0.56	18	0.14	465	27.3529	0.36	11.6	200	0	10	2100	1	17	14	13	13	9	0.692308	13	7	0.538462	2	1	5	4BA	4	B	A	1	1	1	1	0
1	2018-04-18 13:55:00	prolonged protocol	26393	30	33	24.46	1	6	1	0	0	2.45	4.99	40.86	0.26	25	0.23	20	0.26	475	43.1818	0.21	16.4	150	0	11	1875	1	11	9	8	10	4	0.4	10	3	0.3	1	1	5	4BB	4	B	B	1	1	1	1	0
1	2017-12-04 10:23:00	prolonged protocol	24522	29	33	28.04	1	2	1	1	0	4.12	8.95	88.16	0.39	26	0.29	5	0.42	478	79.6667	0.57	9	262.5	0	14	4275	1	6	5	5	5	3	0.6	5	5	1	3	1	5	4AB	4	A	B	1	1	1	1	0
1	2018-07-13 10:17:00	prolonged protocol	28158	35	38	19.81	1	9	1	0	0	2.9	5.13	39.88	0.47	21	0.21	10	0.2	504	50.4	0.51	11.3	225	0	9	2325	1	10	6	5	5	2	0.4	5	3	0.6	1	1	5	4BB	4	B	B	1	1	1	0	1
1	2018-06-19 11:11:00	prolonged protocol	27630	32	37	21.94	1	9	1	0	0	2.27	5.01	52.68	0.28	36	0.45	14	0.62	505	63.125	0.57	8	225	0	8	1988	1	8	5	5	5	3	0.6	5	3	0.6	2	1	5	4AB	4	A	B	1	1	1	1	0
1	2018-03-19 11:29:00	prolonged protocol	25797	29	28	21.22	1	3	2	0	0	5.05	5.01	49.1	0.33	18	0.21	10	0.26	513	64.125	0.41	11.5	225	0	14	2925	1	8	8	8	8	1	0.125	8	1	0.125	1	1	5	4BB	4	B	B	1	1	1	0	1
1	2018-07-05 14:25:00	prolonged protocol	16494	33	34	29.69	1	4	2	0	0	2.02	5.85	61.67	0.11	39	0.37	15	0.16	517	47	0.57	10.9	150	0	8	1275	2	11	8	8	8	2	0.25	8	3	0.375	0	1	5	4BC	4	B	C	1	1	1	1	0
1	2018-07-24 16:54:00	prolonged protocol	28354	28	30	18.66	0	2	2	1	0	2.28	3.63	62.13	0.09	19	0.78	15	0.86	543	181	0.21	14.4	225	0	12	3075	1	3	2	2	2	1	0.5	2	1	0.5	1	1	5	5BB	5	B	B	2	1	1	1	0
1	2018-01-09 08:53:00	prolonged protocol	25009	35	33	24.89	1	1	1	0	0	3.91	9.49	33.73	0.46	31	0.36	13	0.26	564	94	0.38	11.9	225	0	12	3150	1	6	6	6	6	4	0.666667	6	4	0.666667	2	1	5	4AB	4	A	B	1	0	2	0	0
1	2018-09-28 14:07:00	prolonged protocol	29452	37	38	27.89	0	5	1	0	0	5.89	7.01	42.66	0.45	27	0.49	15	0.16	568	28.4	0.54	11	225	0	15	3300	1	20	19	19	20	7	0.35	20	11	0.55	7	1	5	4AB	4	A	B	1	1	1	1	0
1	2018-05-21 14:02:00	prolonged protocol	27035	30	34	22.89	1	1	1	0	0	3.28	6.31	50.84	0.36	20	0.25	14	0.48	609	76.125	0.45	9.7	300	1	10	2700	1	8	5	5	5	1	0.2	5	3	0.6	2	1	5	4BB	4	B	B	2	1	1	1	0
1	2018-05-10 09:15:00	prolonged protocol	26818	35	37	27.34	1	5	2	0	0	3.93	12.29	30.99	0.43	12	0.44	5	0.44	626	156.5	0.25	13.2	300	0	10	3600	2	4	4	4	4	4	1	4	4	1	4	1	5	4BB	4	B	B	1	1	1	1	0
1	2017-09-27 08:38:00	prolonged protocol	21770	31	33	21.5	1	4	3	0	0	3.3.	12.39	94.28	0.56	12	0.53	8	1.01	628	89.7143	0.21	12.5	225	0	13	3150	1	7	7	7	7	5	0.714286	7	4	0.571429	3	1	5	4AB	4	A	B	1	1	1	1	0
1	2018-07-03 08:15:00	prolonged protocol	26872	28	26	24.97	0	3	3	0	0	3.66	8.86	53.83	0.38	20	0.66	10	0.55	638	159.5	0.21	12	225	0	11	2925	1	4	4	4	4	3	0.75	4	3	0.75	3	1	5	4AB	4	A	B	1	1	1	1	0
1	2017-11-08 09:28:00	prolonged protocol	24169	25	36	25.39	0	4	1	0	1	23.7	4.82	33.35	0.53	13	0.21	21	0.46	654	93.4286	0.43	8.8	150	0	13	2025	1	7	7	7	7	6	0.857143	7	4	0.571429	1	1	5	4AA	4	A	A	1	1	1	1	0
1	2018-09-19 08:49:00	prolonged protocol	20892	24	29	20.03	0	4	1	0	0	2.67	8.26	41.19	0.34	26	0.65	20	0.08	674	84.25	0.28	12.4	150	0	12	1650	1	8	5	5	5	3	0.6	5	2	0.4	0	1	5	4CB	4	C	B	1	1	1	1	0
1	2018-06-01 09:56:00	prolonged protocol	27254	35	33	31.89	1	5	2	0	0	1.41	6.05	48.26	0.23	37	0.52	18	0.34	676	56.3333	0.26	10.4	225	0	12	3225	2	12	5	5	5	0	0	5	2	0.4	0	1	5	4BC	4	B	C	3	1	1	1	0
1	2018-06-22 08:24:00	prolonged protocol	27695	34	36	29.24	1	9	1	0	0	5.84	10.8	33.44	0.47	16	0.59	18	0.44	691	115.167	0.57	10.2	225	0	12	2850	1	6	3	3	3	3	1	3	1	0.333333	0	1	5	3BB	3	B	B	1	1	1	1	0
1	2018-08-22 09:38:00	prolonged protocol	28874	26	26	22.65	1	1	1	0	1	3.16	9.47	57.01	0.16	28	0.86	17	0.36	709	50.6429	0.37	8	200	0	12	2300	1	14	6	6	7	3	0.428571	7	6	0.857143	1	1	5	4AB	4	A	B	1	1	1	1	0
1	2018-07-04 14:31:00	prolonged protocol	27987	33	35	17.93	1	3	2	0	0	6.33	10.37	34.45	0.57	15	0.36	8	0.36	726	72.6	0.54	15.8	225	0	14	3263	2	10	8	8	8	5	0.625	8	6	0.75	5	1	5	4AB	4	A	B	1	1	1	0	1
1	2017-10-09 09:18:00	prolonged protocol	23672	30	31	26.67	1	5	1	0	0	2.97	6.23	37.59	0.18	22	0.75	21	0.54	736	122.667	1.09	10.4	112.5	0	16	3150	1	6	5	5	5	4	0.8	5	3	0.6	1	1	5	4BB	4	B	B	1	1	1	0	1
1	2018-07-09 09:57:00	prolonged protocol	28060	30	34	21.88	0	1	3	1	0	3.23	12.07	19.07	0.41	44	0.86	9	0.56	753	150.6	0.5	7.6	225	0	8	1650	1	5	5	5	5	2	0.4	5	3	0.6	1	1	5	4BC	4	B	C	1	1	1	1	0
1	2017-12-18 10:11:00	prolonged protocol	24720	31	31	20.7	0	2	2	0	0	1.97	8.13	34.85	0.52	16	0.86	20	0.56	760	95	1.98	10.7	225	0	13	2550	1	8	8	8	8	4	0.5	8	4	0.5	2	1	5	4BB	4	B	B	1	1	1	1	0
1	2018-01-15 14:26:00	prolonged protocol	25123	31	31	30.86	0	4	1	0	1	7.59	8.03	33.83	0.28	23	0.25	20	0.07	777	129.5	0.21	9.8	200	0	14	2950	1	6	6	6	6	5	0.833333	6	6	1	2	1	5	4BB	4	B	B	1	1	1	1	0
1	2018-07-31 10:44:00	prolonged protocol	28478	28	29	21.23	1	4	2	0	1	6.57	7.03	40.84	0.35	23	0.34	30	0.17	777	111	0.41	10.7	150	0	13	2063	2	7	5	5	5	3	0.6	5	3	0.6	1	1	5	4AB	4	A	B	1	1	1	1	0
1	2018-06-04 09:58:00	prolonged protocol	27285	36	34	27.34	1	3	3	0	0	2.47	9.72	64.15	0.26	31	0.96	8	0.37	796	79.6	0.28	9.8	375	0	15	4425	0	10	8	8	8	3	0.375	8	6	0.75	3	1	5	4AB	4	A	B	1	1	1	0	1
1	2018-10-17 09:35:00	prolonged protocol	29720	29	32	23.44	1	4	1	0	1	6.29	7.18	42.22	0.23	30	0.98	25	0.15	804	47.2941	0.29	8	150	0	12	1650	1	17	14	14	15	9	0.6	15	7	0.466667	3	1	5	4BB	4	B	B	1	1	1	1	0
1	2017-10-13 10:09:00	prolonged protocol	23769	28	31	25.39	1	2	1	0	0	0.64	4.4	58.52	0.21	23	0.77	27	0.1	812	47.7647	0.43	11.3	150	0	14	2625	1	17	12	12	12	5	0.416667	12	6	0.5	4	1	5	4AB	4	A	B	1	0	2	0	0
1	2018-07-16 15:25:00	prolonged protocol	28210	34	36	25.08	1	3	2	0	0	1.82	7.79	45.13	0.2	36	0.3	14	0.41	830	118.571	0.55	11.2	300	0	11	3300	1	7	2	2	3	1	0.333333	3	1	0.333333	1	1	5	5BB	5	B	B	1	1	1	1	0
1	2018-07-02 15:01:00	prolonged protocol	26495	28	33	23.83	1	3	1	0	0	4.86	5.67	82.62	0.31	33	0.62	17	0.6	842	84.2	0.63	8	187.5	0	10	2325	1	10	8	8	8	4	0.5	8	4	0.5	3	1	5	4BB	4	B	B	1	1	1	1	0
1	2018-03-16 10:11:00	prolonged protocol	25762	36	35	20.57	1	3	3	0	0	6.12	9.57	41	0.34	30	0.23	10	0.43	852	60.8571	0.5	15.3	225	0	11	3000	1	14	12	12	12	9	0.75	12	9	0.75	4	1	5	4BB	4	B	B	1	1	1	1	0
1	2017-11-11 11:00:00	prolonged protocol	24222	27	33	25.51	1	1	1	0	0	4.43	6.97	38.74	0.65	29	0.54	16	0.88	856	85.6	0.55	7.2	225	0	8	1800	1	10	6	5	7	4	0.571429	7	6	0.857143	3	1	5	4AB	4	A	B	1	1	1	1	0
1	2017-09-06 10:41:00	prolonged protocol	23176	30	34	22.58	1	4	3	0	0	4.96	7.17	45.55	0.45	30	0.67	14	0.18	865	72.0833	0.46	10.3	150	0	19	4200	2	12	11	11	11	4	0.363636	11	4	0.363636	2	1	5	4AB	4	A	B	1	1	1	1	0
1	2018-07-03 11:12:00	prolonged protocol	27947	34	38	26.57	1	1	1	0	0	3	8.21	41.7	0.16	19	0.3	12	0.99	871	290.333	0.45	6.7	225	0	9	1875	1	3	2	2	2	2	1	2	2	1	2	1	5	4AB	4	A	B	1	1	1	1	0
1	2017-11-27 11:01:00	prolonged protocol	24427	29	29	19.29	1	5	1	1	1	3.58	4.89	49.97	0.37	15	0.72	24	0.48	874	48.5556	0.92	13.1	225	0	8	1575	1	18	15	14	15	4	0.266667	15	8	0.533333	4	1	5	5BB	5	B	B	1	1	1	0	1
1	2018-03-23 11:10:00	prolonged protocol	25878	30	34	29.03	1	2	1	0	1	5.39	5.42	49.85	0.51	24	0.77	25	0.37	890	98.8889	0.21	6.5	150	0	12	2025	1	9	6	6	7	5	0.714286	7	4	0.571429	2	1	5	4BB	4	B	B	1	1	1	1	0
1	2017-10-04 11:30:00	prolonged protocol	23626	24	27	19.82	0	3	1	0	1	12.61	6.72	47.18	0.17	13	0.21	16	0.33	891	68.5385	0.22	12.1	150	1	8	1050	2	13	11	11	10	6	0.6	10	6	0.6	1	1	5	4AB	4	A	B	1	1	1	1	0
1	2018-03-08 14:29:00	prolonged protocol	25640	25	31	19.92	0	4	1	0	1	6.15	6.13	18.33	0.37	29	0.41	11	0.38	902	180.4	0.21	10.8	150	1	14	2325	1	5	3	3	4	2	0.5	4	3	0.75	2	1	5	5AB	5	A	B	1	0	2	0	0
1	2018-08-29 09:47:00	prolonged protocol	28976	39	39	19.57	1	2	2	0	0	4.93	4.75	62.48	0.52	39	0.46	17	0.83	905	100.556	0.84	11.4	225	0	7	1688	2	9	5	5	6	1	0.166667	6	1	0.166667	0	1	5	4AC	4	A	C	1	1	1	1	0
1	2018-07-17 08:41:00	prolonged protocol	28219	33	35	25.82	1	4	3	0	0	3.39	9.78	21.97	0.29	19	0.38	17	0.35	911	101.222	0.32	10.7	225	0	14	3450	1	9	9	9	9	6	0.666667	9	7	0.777778	4	1	5	4BB	4	B	B	1	1	1	1	0
1	2018-06-28 09:04:00	prolonged protocol	27811	26	35	16.65	0	4	1	1	0	6.47	11.89	46.67	0.4	20	0.29	18	0.57	924	115.5	0.27	8.3	200	0	12	2850	1	8	7	7	7	2	0.285714	7	2	0.285714	2	1	5	4AB	4	A	B	1	1	1	1	0
1	2017-06-08 11:22:00	prolonged protocol	21658	39	44	22.1	1	1	2	0	0	3.02	1.95	37.29	0.09	24	0.37	13	0.45	927	44.1429	0.41	6.7	225	0	9	1650	1	21	7	7	10	6	0.6	10	7	0.7	3	1	5	4AA	4	A	A	1	1	1	1	0
1	2017-11-03 09:36:00	prolonged protocol	24083	38	43	20.89	1	2	3	0	0	4.04	5.98	71.16	0.39	13	0.61	7	0.52	937	156.167	1.02	9.9	300	0	10	3000	1	6	6	6	6	4	0.666667	6	5	0.833333	2	1	5	4BB	4	B	B	1	1	1	1	0
1	2018-08-07 11:18:00	prolonged protocol	28623	36	38	19.56	1	2	1	0	0	2.69	8.78	41.78	0.43	31	1.49	12	0.63	945	72.6923	0.5	11.2	300	0	10	3000	2	13	11	11	12	10	0.833333	12	3	0.25	1	1	5	4BB	4	B	B	1	1	1	1	0
1	2018-06-27 09:35:00	prolonged protocol	27782	29	30	23.05	1	1	1	0	0	3.83	4.92	37.85	0.72	25	0.48	16	0.83	948	86.1818	0.51	10.7	150	0	8	1125	1	11	7	7	7	1	0.142857	7	4	0.571429	1	1	5	4BB	4	B	B	1	1	1	1	0
1	2018-09-12 08:55:00	prolonged protocol	22982	37	42	18.49	1	2	1	0	0	5.35	8.74	23.64	0.41	13	0.54	10	0.68	968	242	0.69	8.7	300	0	12	4125	1	4	2	2	2	0	0	2	2	1	1	1	5	5BB	5	B	B	2	1	1	1	0
1	2018-10-03 09:00:00	prolonged protocol	29497	33	38	18.93	0	2	3	0	0	3	9.61	40.24	0.18	16	0.57	13	0.77	977	81.4167	0.39	10.8	300	0	12	3600	1	12	7	7	7	6	0.857143	7	5	0.714286	3	1	5	4AB	4	A	B	1	1	1	1	0
1	2018-04-16 08:49:00	prolonged protocol	26305	30	31	22.27	1	1	3	0	0	4.51	8.36	68.81	0.2	49	0.23	13	0.29	977	108.556	0.31	12	225	0	9	1950	1	9	6	6	6	2	0.333333	6	5	0.833333	3	1	5	4BB	4	B	B	1	1	1	1	0
1	2017-09-25 10:46:00	prolonged protocol	23492	39	40	24.14	1	1	1	0	0	3.99	8.11	37.76	0.18	19	0.21	10	0.8	987	89.7273	0.21	9	300	0	16	3675	1	11	7	7	7	3	0.428571	7	5	0.714286	2	1	5	4AB	4	A	B	1	1	2	0	0
1	2018-07-23 14:05:00	prolonged protocol	28330	32	32	30.05	0	10	1	0	0	2.78	9.23	42.74	0.14	31	0.41	6	0.45	999	111	0.42	6.3	300	0	12	3525	1	9	5	5	6	4	0.666667	6	3	0.5	1	1	5	4BC	4	B	C	1	1	1	1	0
1	2017-10-04 10:32:00	prolonged protocol	22362	33	34	21.72	1	5	4	0	0	2.59	4.95	57.8	0.63	44	0.37	20	0.49	1013	56.2778	0.21	11.3	150	0	8	1125	1	18	12	12	18	2	0.111111	18	3	0.166667	1	1	5	4AB	4	A	B	1	1	1	1	0
1	2017-11-23 09:07:00	prolonged protocol	24368	34	32	21.33	0	4	3	0	0	3.91	7.55	36.88	0.55	14	0.39	10	0.43	1020	78.4615	0.53	11.4	300	0	11	3150	1	13	12	11	11	8	0.727273	11	8	0.727273	6	1	5	4AB	4	A	B	1	1	1	1	0
1	2018-06-05 09:12:00	prolonged protocol	27320	26	30	19.47	1	1	2	0	0	6.18	11	62.46	0.46	41	0.5	18	0.45	1033	344.333	0.27	12	225	0	11	2775	1	3	2	2	2	2	1	2	2	1	0	1	5	4CB	4	C	B	1	0	2	0	0
1	2018-04-18 09:25:00	prolonged protocol	26368	29	34	23.88	1	1	1	0	0	2.54	5.97	33.76	0.26	22	0.27	12	0.59	1039	79.9231	0.56	16.9	225	0	9	2025	1	13	10	9	11	9	0.818182	11	5	0.454545	4	1	5	4BB	4	B	B	1	1	1	1	0
1	2017-05-12 14:05:00	prolonged protocol	21254	29	28	20.7	1	2	3	0	1	4.79	5.6	35.23	0.54	28	0.21	27	0.45	1040	57.7778	0.31	11	150	0	12	1463	1	18	9	9	10	9	0.9	10	8	0.8	5	1	5	4AA	4	A	A	1	1	1	1	0
1	2017-01-09 10:31:00	prolonged protocol	19459	27	33	22.04	0	4	2	0	0	4.17	7	55.41	0.39	22	0.4	17	0.24	1041	49.5714	0.21	10.4	150	1	14	2175	1	21	15	15	15	10	0.666667	13	12	0.923077	6	1	5	4AA	4	A	A	1	2	1	1	0
1	2018-09-28 09:50:00	prolonged protocol	29447	24	29	20.57	1	1	1	0	0	19.63	7.96	58.46	0.2	16	0.29	20	0.12	1044	80.3077	0.37	9	112.5	0	10	1125	1	13	11	11	12	7	0.583333	12	3	0.25	1	1	5	4BA	4	B	A	1	1	1	1	0
1	2018-10-24 10:46:00	prolonged protocol	26760	34	46	23.18	0	9	2	0	0	4.94	6.08	29.85	0.26	19	1.13	17	0.56	1050	95.4545	0	7.7	300	0	10	3225	2	11	10	10	10	2	0.2	10	5	0.5	4	1	5	4AB	4	A	B	1	1	1	1	0
1	2018-09-28 10:52:00	prolonged protocol	29449	38	29	24.84	1	3	1	0	0	2.7	5.5	40.2	0.28	13	0.61	7	0.07	1055	105.5	0.86	12.2	375	0	13	4000	1	10	8	8	8	5	0.625	8	3	0.375	2	1	5	4BB	4	B	B	1	1	1	1	0
1	2018-08-02 09:43:00	prolonged protocol	28532	36	36	23.88	0	1	4	0	1	3.79	10.7	16.99	0.47	18	0.26	17	0.19	1060	117.778	0.3	10.6	225	0	9	2213	1	9	8	8	8	7	0.875	8	5	0.625	4	1	5	4AB	4	A	B	1	1	1	1	0
1	2017-12-29 09:08:00	prolonged protocol	23669	38	42	20.2	1	1	2	0	0	6.19	8.24	39.11	0.59	18	0.47	17	0.47	1078	63.4118	0.67	6.4	187.5	0	8	1500	1	17	10	10	10	3	0.3	10	5	0.5	1	1	5	4BB	4	B	B	1	1	1	1	0
1	2017-05-02 14:48:00	prolonged protocol	21078	29	33	19.43	1	3	1	0	1	4.72	5.2	44.26	0.67	41	0.21	27	0.07	1081	54.05	0.56	11	112.5	0	9	975	0	20	14	14	14	4	0.285714	14	5	0.357143	3	1	5	4AB	4	A	B	1	1	1	0	1
1	2018-02-12 10:37:00	prolonged protocol	25370	33	33	21.22	0	2	3	1	0	5.46	7.11	37.62	0.57	16	0.38	9	0.68	1103	137.875	0.29	10.8	150	1	12	2100	1	8	7	7	7	3	0.428571	7	4	0.571429	3	1	5	4AB	4	A	B	1	1	1	1	0
1	2018-05-11 14:11:00	prolonged protocol	26863	32	34	24.84	0	2	2	0	0	4.43	5.93	31.36	0.17	12	0.32	14	0.44	1105	92.0833	0.21	10.6	225	0	11	2100	1	12	7	7	7	5	0.714286	7	7	1	3	1	5	4AB	4	A	B	1	1	1	1	0
1	2017-09-22 10:49:00	prolonged protocol	23469	20	24	24.31	0	2	1	0	0	7.65	5.41	46.9	0.33	38	0.37	29	1.49	1106	100.545	0.46	10.9	100	0	14	1800	1	11	6	6	8	6	0.75	8	2	0.25	0	1	5	3AB	3	A	B	1	1	1	1	0
1	2018-07-25 11:18:00	prolonged protocol	28375	30	36	21.09	1	6	1	0	0	4.73	7.31	39	0.26	43	0.35	20	0.47	1110	111	0.21	11.5	150	0	9	1275	1	10	6	6	6	4	0.666667	6	5	0.833333	1	1	5	4BB	4	B	B	1	0	2	0	0
1	2017-09-19 08:24:00	prolonged protocol	23383	30	30	20.31	1	1	3	1	0	3.94	7.51	34.35	0.07	13	0.21	20	0.14	1113	61.8333	0.29	11.7	200	1	11	2050	1	18	17	16	16	11	0.6875	16	6	0.375	5	1	5	4AB	4	A	B	1	1	1	1	0
1	2018-04-02 09:44:00	prolonged protocol	26046	32	29	22.5	1	1	1	0	0	3.91	7.41	40.02	0.44	26	0.63	15	0.82	1119	124.333	0.78	16.9	150	0	12	2550	1	9	7	7	7	3	0.428571	7	4	0.571429	1	1	5	4BC	4	B	C	1	1	1	1	0
1	2018-05-21 10:01:00	prolonged protocol	27021	31	44	27.94	1	2	1	0	0	3.87	7.57	48	0.21	14	0.21	9	0.33	1124	187.333	0.67	16.4	225	0	13	4050	1	6	4	4	4	1	0.25	4	3	0.75	0	1	5	4CB	4	C	B	1	1	1	1	0
1	2018-07-06 16:32:00	prolonged protocol	28024	42	45	23.05	1	2	1	0	0	2.66	6.02	52.43	0.37	18	0.21	7	0.77	1134	141.75	0.7	12.5	300	0	15	4350	1	8	7	7	8	8	1	8	4	0.5	3	1	5	4BA	4	B	A	1	1	1	1	0
1	2018-04-19 08:24:00	prolonged protocol	26406	26	27	20.43	0	8	2	0	0	1.84	6.76	51.52	0.24	32	0.54	14	0.31	1138	162.571	0.38	15	225	0	9	2175	2	7	7	7	7	3	0.428571	7	3	0.428571	1	1	5	3AB	3	A	B	1	1	1	1	0
1	2017-10-23 09:08:00	prolonged protocol	23909	25	26	27.24	0	3	1	0	1	7.92	7.52	66.3	0.22	12	0.49	29	0.18	1162	105.636	0.49	9	150	1	25	5063	1	11	6	6	6	5	0.833333	6	3	0.5	2	1	5	4BB	4	B	B	1	1	1	1	0
1	2018-10-03 08:58:00	prolonged protocol	28785	32	37	18.37	1	1	2	0	0	4.76	7.44	53.63	0.48	31	0.5	16	0.4	1164	64.6667	0.73	7.4	225	0	8	1650	1	18	12	12	12	6	0.5	12	7	0.583333	5	1	5	4AB	4	A	B	1	1	1	1	0
1	2017-02-10 15:07:00	prolonged protocol	19665	35	38	25.15	1	1	1	0	0	2.22	7.96	60.27	0.28	21	0.46	17	0.63	1170	48.75	0.94	13.4	225	0	13	3450	1	24	22	22	22	16	0.727273	22	14	0.636364	10	1	5	4AB	4	A	B	1	0	2	0	0
1	2018-06-23 10:38:00	prolonged protocol	27723	34	36	19.2	1	2	3	0	0	3.3	7.57	47.18	0.44	16	0.48	10	0.95	1200	109.091	0.47	6.7	300	0	12	3225	1	11	9	9	10	5	0.5	10	7	0.7	3	1	5	4BA	4	B	A	1	1	1	1	0
1	2018-03-20 16:26:00	prolonged protocol	25834	28	29	22.27	1	2	1	0	0	4.06	7.55	46.24	0.62	29	0.53	14	0.5	1201	133.444	0.94	12.1	187.5	0	11	2700	1	9	7	7	7	3	0.428571	7	4	0.571429	3	1	5	4BA	4	B	A	1	1	1	1	0
1	2018-05-26 11:09:00	prolonged protocol	27138	37	45	19.78	1	1	2	0	0	3.04	7.55	45.82	0.2	25	0.21	18	0.4	1209	109.909	0.39	9.4	150	0	11	2100	0	11	9	7	9	2	0.222222	9	2	0.222222	1	1	5	4BB	4	B	B	1	1	1	1	0
1	2017-10-20 09:45:00	prolonged protocol	23882	30	34	21.76	0	2	4	0	0	2.92	7.79	50.29	0.25	15	0.27	10	0.21	1213	134.778	0.39	10.1	225	0	11	2400	1	9	6	5	5	4	0.8	5	5	1	2	1	5	4AB	4	A	B	1	1	1	1	0
1	2018-10-09 08:58:00	prolonged protocol	29577	33	35	19.56	1	3	1	0	0	5.15	13.41	32.01	0.28	12	0.46	11	0.41	1224	244.8	0.36	14.1	225	0	10	2175	1	5	3	3	3	3	1	3	3	1	3	1	5	4AB	4	A	B	1	1	1	1	0
1	2018-09-20 11:20:00	prolonged protocol	29328	28	32	28.23	0	10	1	0	0	7.18	13.26	24.35	0.59	17	0.44	10	0.46	1241	103.417	0.3	12.5	225	0	16	4650	1	12	5	5	6	3	0.5	6	5	0.833333	2	1	5	4AB	4	A	B	1	1	1	1	0
1	2018-04-23 09:52:00	prolonged protocol	26455	33	41	28.76	1	3	3	0	0	3.3	5.86	57.21	0.36	38	0.23	17	0.35	1243	124.3	0.26	9.9	150	0	8	1275	1	10	8	8	8	6	0.75	8	5	0.625	3	1	5	5BB	5	B	B	1	1	1	1	0
1	2018-04-09 10:27:00	prolonged protocol	26205	24	26	20.96	1	1	1	0	0	5.18	10.39	30	0.49	15	0.55	12	0.89	1252	250.4	0.49	14.4	187.5	0	11	2700	1	5	3	3	4	3	0.75	4	3	0.75	2	1	5	4BB	4	B	B	1	1	1	1	0
1	2018-07-17 15:55:00	prolonged protocol	27270	27	31	20.83	1	1	2	0	0	3.66	7.03	39.4	0.26	20	0.85	24	0.36	1258	62.9	0.7	10	250	0	9	2250	1	20	13	13	13	8	0.615385	13	7	0.538462	6	1	5	4BB	4	B	B	1	1	1	1	0
1	2017-12-01 14:35:00	prolonged protocol	24507	29	32	24.65	0	3	4	0	0	5.48	5.86	63.73	0.1	50	0.23	11	0.62	1260	140	1.3	12.7	225	0	16	3525	1	9	5	5	5	3	0.6	5	1	0.2	1	1	5	4BB	4	B	B	1	1	1	1	0
1	2017-03-30 09:59:00	prolonged protocol	20508	31	32	19.56	1	6	3	1	0	1.71	5.93	43.16	0.22	19	0.53	16	0.39	1262	63.1	0.82	12	225	0	11	2475	1	20	9	9	9	5	0.555556	9	6	0.666667	2	1	5	4AB	4	A	B	1	1	1	1	0
1	2018-03-05 09:39:00	prolonged protocol	25564	26	26	24.52	0	3	3	0	0	2.35	7.6	49.42	0.21	12	0.34	10	0.56	1265	180.714	0.48	10.1	150	0	16	3150	1	7	5	5	5	3	0.6	5	1	0.2	0	1	5	3BC	3	B	C	1	1	1	1	0
1	2018-04-13 09:39:00	prolonged protocol	26286	27	33	24.17	0	3	2	0	1	4.19	6.95	30.03	0.15	20	0.42	17	0.15	1275	98.0769	0.75	7.9	225	0	9	2175	1	13	12	12	12	3	0.25	12	5	0.416667	4	1	5	4AB	4	A	B	1	1	1	1	0
1	2018-08-23 10:39:00	prolonged protocol	26167	38	42	21.64	0	10	2	0	0	2.71	5.53	70.97	0.52	29	0.78	13	1.12	1281	128.1	0.65	11.9	300	0	9	2325	1	10	5	5	5	4	0.8	5	4	0.8	2	1	5	4AB	4	A	B	1	1	1	1	0
1	2016-10-20 10:00:00	prolonged protocol	12862	26	30	23.63	1	1	1	0	1	3.71	3.52	55.3	0.55	38	0.57	14	0.43	1283	64.15	0.23	9.3	100	0	11	1200	1	20	19	19	19	13	0.684211	15	9	0.6	0	1	5	3AB	3	A	B	2	0	2	0	0
1	2018-08-10 10:00:00	prolonged protocol	22058	30	28	23.05	0	3	1	0	0	2.66	6.47	35.76	0.4	12	0.35	23	0.39	1286	142.889	0.32	11.7	150	0	12	1875	1	9	6	5	5	2	0.4	5	1	0.2	0	1	5	4BC	4	B	C	1	1	1	1	0
1	2017-08-30 14:24:00	prolonged protocol	23081	21	30	23.11	0	4	3	0	1	3.53	6.81	31.97	0.21	40	0.21	18	0.56	1293	99.4615	0.31	12	150	0	7	1050	2	13	8	8	8	4	0.5	8	4	0.5	0	1	5	3BB	3	B	B	1	1	1	1	0
1	2018-05-18 10:50:00	prolonged protocol	26988	29	31	22.31	0	1	3	0	1	7	7.2	36.49	0.34	28	0.39	19	0.37	1307	87.1333	0.52	14.2	150	0	11	1650	1	15	12	12	13	9	0.692308	13	11	0.846154	6	1	5	4AA	4	A	A	1	1	1	1	0
1	2017-08-29 13:52:00	prolonged protocol	21252	31	31	17.51	0	2	4	1	0	7.09	10.84	32.96	0.48	12	0.5	9	0.98	1317	164.625	0.94	12.3	225	0	13	3525	2	8	8	8	8	4	0.5	8	4	0.5	2	1	5	4BB	4	B	B	1	1	1	1	0
1	2018-08-29 08:57:00	prolonged protocol	28972	34	37	20.57	0	14	1	0	0	4.91	9.08	53.63	0.3	12	0.25	14	1.07	1318	131.8	0.45	14.6	300	0	10	2925	1	10	8	8	8	4	0.5	8	7	0.875	1	1	5	4AB	4	A	B	1	0	2	0	0
1	2017-12-04 11:33:00	prolonged protocol	9401	24	29	21.64	1	3	2	0	0	4.04	8.94	36.41	0.24	13	0.22	16	0.26	1322	101.692	0.49	22.44	112.5	1	13	2475	2	13	13	13	13	7	0.538462	13	6	0.461538	2	1	5	4AB	4	A	B	1	1	1	1	0
1	2018-05-14 09:55:00	prolonged protocol	26889	29	28	23.44	1	4	1	0	0	6.4	10.57	52.3	0.49	18	0.26	18	0.33	1328	94.8571	0.47	13.6	225	0	12	2850	2	14	13	13	13	8	0.615385	13	10	0.769231	5	1	5	4AB	4	A	B	1	1	1	1	0
1	2018-09-06 16:50:00	prolonged protocol	29126	30	31	24.98	0	4	1	0	1	3.9	5.2	40	0.31	18	1.02	19	1.83	1330	332.5	1.06	9.5	225	0	15	4050	1	4	4	4	4	2	0.5	4	3	0.75	0	1	5	4BC	4	B	C	1	1	1	1	0
1	2018-06-26 10:48:00	prolonged protocol	27766	30	34	22.58	1	2	1	0	0	2.53	7.81	33.74	0.21	20	0.46	20	0.22	1333	88.8667	0.21	12.5	150	0	12	2100	1	15	9	9	10	6	0.6	10	6	0.6	3	1	5	4AB	4	A	B	1	1	1	1	0
1	2018-07-23 08:37:00	prolonged protocol	28312	28	31	28.76	1	3	4	0	1	5.55	6.91	27.32	0.12	12	0.41	30	0	1335	95.3571	0.46	11.5	150	0	15	2625	0	14	11	11	11	10	0.909091	11	7	0.636364	4	1	5	4BA	4	B	A	1	1	1	1	0
1	2017-03-27 11:37:00	prolonged protocol	1231	36	37	23.92	1	6	1	0	0	2.82	6.96	51.69	0.23	38	0.24	22	0.37	1338	148.667	0.25	13.2	225	0	14	2250	1	9	7	7	8	3	0.375	8	5	0.625	2	1	5	4AB	4	A	B	1	1	1	1	0
1	2018-10-15 08:57:00	prolonged protocol	29668	27	28	19.63	0	8	1	0	0	4.83	4.52	35.75	0.18	12	0.48	26	0.36	1338	83.625	0.71	10.2	200	0	8	1400	1	16	14	14	14	3	0.214286	14	11	0.785714	10	1	5	4BA	4	B	A	1	1	1	1	0
1	2018-05-22 08:51:00	prolonged protocol	27041	25	30	23.31	0	3	1	0	0	7.24	4.23	49.13	0.59	27	0.71	20	0.2	1349	89.9333	0.39	10.4	150	0	12	1800	1	15	15	14	14	7	0.5	14	5	0.357143	3	1	5	4BB	4	B	B	1	1	1	1	0
1	2017-04-20 10:35:00	prolonged protocol	18125	28	29	16.94	0	1	3	0	0	7	9.38	51.1	0.22	21	0.21	16	0.29	1353	75.1667	0.66	9.4	150	0	10	1800	1	18	13	13	14	7	0.5	14	10	0.714286	4	1	5	4AB	4	A	B	1	1	1	1	0
1	2016-12-13 11:22:00	prolonged protocol	19141	26	27	23.05	0	2	3	0	0	4.51	6.45	40.18	0.61	20	0.59	10	0.59	1353	96.6429	0.91	12.8	225	0	11	2475	0	14	5	5	5	2	0.4	5	3	0.6	3	1	5	4AB	4	A	B	1	1	1	1	0
1	2018-07-04 10:32:00	prolonged protocol	27971	33	34	20.4	1	10	1	0	0	3.94	9.77	83.21	0.7	23	1.15	15	2.55	1360	340	0.37	13.1	225	0	11	2500	1	4	3	3	3	3	1	3	3	1	3	1	5	4AB	4	A	B	1	1	1	0	1
1	2018-01-04 08:27:00	prolonged protocol	24937	28	30	20.08	0	2	3	0	0	7.03	15.01	23.59	0.42	18	0.7	8	1.27	1365	273	0.21	11	225	0	16	3675	1	5	4	4	4	0	0	2	2	1	0	1	5	3BC	3	B	C	2	1	1	1	0
1	2018-03-19 10:00:00	prolonged protocol	25789	27	30	22.76	0	1	2	0	1	2.88	6.09	34.63	0.34	35	1.01	24	0.52	1389	106.846	0.28	10.6	112.5	0	10	1163	2	13	5	5	5	4	0.8	5	3	0.6	3	1	5	5AB	5	A	B	1	1	1	1	0
1	2018-07-10 11:06:00	prolonged protocol	28104	25	26	19.57	1	1	2	0	0	3.87	6.13	39.85	0.38	32	0.68	22	0.56	1389	92.6	0.3	11.7	150	0	10	1500	2	15	14	14	14	9	0.642857	14	7	0.5	3	1	5	4AB	4	A	B	1	1	1	1	0
1	2018-09-03 13:40:00	prolonged protocol	20430	31	32	18.73	1	1	2	0	0	3.67	6.64	83.03	0.36	23	0.49	13	0.53	1392	232	0.98	10.2	225	0	9	2400	1	6	3	3	4	3	0.75	4	3	0.75	3	1	5	4BB	4	B	B	1	1	1	1	0
1	2018-09-03 16:33:00	prolonged protocol	29058	23	28	20.2	0	1	1	0	1	5.38	6.6	35.22	0.32	23	0.65	24	0.29	1393	126.636	0.57	11.5	150	0	12	1650	1	11	6	6	6	1	0.166667	6	5	0.833333	0	1	5	4BC	4	B	C	1	1	1	1	0
1	2018-06-15 09:56:00	prolonged protocol	27557	26	29	21.23	1	1	4	0	0	1.54	3.9	25.5	0.35	40	0.34	23	0.48	1397	155.222	0.49	10.6	112.5	0	9	1050	1	9	6	6	6	4	0.666667	6	3	0.5	2	1	5	4AB	4	A	B	1	1	1	1	0
1	2018-05-30 10:40:00	prolonged protocol	17997	31	32	20.32	1	2	3	0	0	3.36	6.75	37.88	0.74	21	0.47	20	0.67	1401	140.1	0.49	13.8	150	0	10	1725	1	10	6	5	6	3	0.5	6	3	0.5	0	1	5	4BC	4	B	C	1	1	1	1	0
1	2018-04-30 11:37:00	prolonged protocol	26619	36	41	25.48	1	3	1	0	0	1.61	6.37	56.5	0.12	34	0.25	11	0.52	1408	281.6	0.25	14.6	300	0	14	3600	1	5	4	4	4	2	0.5	4	3	0.75	2	1	5	4BB	4	B	B	1	1	1	1	0
1	2018-02-27 14:47:00	prolonged protocol	25493	34	44	19.05	1	1	3	0	0	5.86	7.69	44.96	0.39	21	0.46	17	0.35	1408	93.8667	0.63	10.2	225	0	12	2700	1	15	9	9	9	6	0.666667	9	7	0.777778	4	1	5	4BA	4	B	A	1	1	1	1	0
1	2017-09-04 10:30:00	prolonged protocol	23137	24	24	23.44	0	2	1	0	0	3.89	4.83	43.31	0.07	17	0.21	12	0.31	1416	141.6	0.38	11.5	225	1	10	2175	1	10	7	6	7	5	0.714286	7	6	0.857143	3	1	5	4AA	4	A	A	1	1	1	1	0
1	2017-08-11 09:05:00	prolonged protocol	22767	32	34	27.34	1	1	3	0	0	2.48	8.22	45.51	0.11	12	0.21	12	0.65	1421	142.1	0.32	11.6	225	0	11	2625	1	10	7	7	8	6	0.75	8	8	1	8	1	5	4AB	4	A	B	1	1	1	1	0
1	2018-03-12 10:16:00	prolonged protocol	25681	22	23	23.05	0	5	3	0	0	6.05	7.17	50.7	0.33	26	1.07	14	0.84	1434	95.6	0.89	13.8	150	0	12	2025	2	15	12	12	12	6	0.5	12	10	0.833333	5	1	5	4BA	4	B	A	1	1	1	1	0
1	2018-08-28 09:14:00	prolonged protocol	28900	31	35	19.47	0	4	1	0	0	3.41	7.95	46.22	0.35	34	0.66	10	2.23	1440	120	1.02	9.9	225	0	12	3150	1	12	4	4	4	3	0.75	4	2	0.5	2	1	5	4AA	4	A	A	1	0	2	0	0
1	2018-05-21 10:43:00	prolonged protocol	27029	29	33	22.04	1	7	3	0	0	3.32	5.41	43.34	0.41	12	0.34	13	0.81	1443	180.375	0.49	9.7	150	0	12	2600	1	8	4	4	4	2	0.5	4	2	0.5	2	1	5	4BB	4	B	B	1	1	1	1	0
1	2018-05-11 10:32:00	prolonged protocol	26846	32	34	23.73	0	6	2	0	0	4.22	6.36	64.11	0.22	40	0.28	11	0.35	1447	241.167	0.58	15.8	225	0	12	3225	1	6	5	5	5	2	0.4	5	3	0.6	2	1	5	4BB	4	B	B	1	1	1	1	0
1	2018-05-05 10:58:00	prolonged protocol	21135	26	32	24.77	1	3	1	0	0	3.8	7.08	44.5	0.71	28	0.76	15	0.19	1448	85.1765	0.32	13.8	150	0	10	1500	1	17	10	9	11	2	0.181818	11	2	0.181818	2	1	5	4BB	4	B	B	1	1	1	1	0
1	2016-09-14 14:13:00	prolonged protocol	4691	30	32	19.92	1	6	3	0	1	3.9	6.92	44.1	0.43	20	0.32	15	0.58	1452	85.4118	0.45	11.6	100	1	27	6475	1	17	10	10	10	8	0.8	10	8	0.8	2	1	5	4AB	4	A	B	1	1	1	1	0
1	2018-08-18 09:02:00	prolonged protocol	28817	28	32	21.22	1	1	1	0	0	4.65	6.14	49.25	0.64	19	0.42	15	1.06	1456	132.364	0.43	12.3	150	0	10	1425	1	11	10	10	10	4	0.4	10	6	0.6	4	1	5	4BA	4	B	A	1	1	1	1	0
1	2018-07-13 09:29:00	prolonged protocol	28153	28	27	21.93	0	6	3	0	1	8.2	5.42	37.79	0.34	32	0.49	43	0.4	1457	112.077	0.43	12.3	100	0	9	900	1	13	10	10	10	5	0.5	10	8	0.8	4	1	5	4BA	4	B	A	1	1	1	1	0
1	2018-05-26 09:10:00	prolonged protocol	27128	30	31	23.34	1	2	4	0	0	4.33	8.49	47.83	0.19	26	0.47	16	0.62	1461	182.625	0.21	12.3	225	0	12	2550	1	8	5	5	6	5	0.833333	6	5	0.833333	4	1	5	4AB	4	A	B	1	0	2	0	0
1	2017-12-12 10:06:00	prolonged protocol	24635	29	31	21.3	1	1	2	0	0	3.83	6.38	28.34	0.38	18	0.41	14	0.59	1469	183.625	0.24	6.4	225	0	9	1950	2	8	6	6	6	4	0.666667	6	5	0.833333	2	1	5	4BB	4	B	B	1	1	1	1	0
1	2018-03-30 11:34:00	prolonged protocol	26027	30	32	20.03	1	1	4	0	0	4.44	9.01	37.71	0.45	22	0.44	9	0.25	1471	183.875	0.59	9.5	300	0	12	4125	1	8	5	5	5	3	0.6	5	3	0.6	3	1	5	4BB	4	B	B	1	1	1	1	0
1	2017-10-20 14:55:00	prolonged protocol	23892	31	33	19.83	1	1	3	0	0	4.11	7.09	41.14	0.28	22	0.94	11	0.69	1473	245.5	1.09	10.5	187.5	0	14	3600	1	6	6	6	6	5	0.833333	6	6	1	4	1	5	4BB	4	B	B	1	0	2	0	0
1	2017-12-11 10:45:00	prolonged protocol	24607	33	35	21.72	1	8	4	0	0	4.8	6.5	42.23	0.49	28	0.37	12	0.37	1476	92.25	1.13	11	187.5	0	12	2925	1	16	12	12	12	4	0.333333	12	3	0.25	2	1	5	4BB	4	B	B	1	1	1	1	0
1	2017-12-13 09:01:00	prolonged protocol	24657	26	28	18.73	0	2	1	1	0	6.15	5.32	46.7	0.49	32	0.46	9	0.82	1478	123.167	0.3	12.7	300	0	14	3600	1	12	10	10	10	4	0.4	10	5	0.5	1	1	5	4BB	4	B	B	1	1	1	1	0
1	2018-02-05 09:13:00	prolonged protocol	25327	30	36	19.56	0	10	2	0	0	2.76	6.48	28	0.46	16	0.51	24	0.57	1481	67.3182	0.87	10	150	0	11	1500	2	22	14	14	14	8	0.571429	14	3	0.214286	0	1	5	3BC	3	B	C	1	1	1	1	0
1	2017-11-06 11:41:00	prolonged protocol	24129	37	32	20.7	1	8	2	0	0	3.53	8.16	34.41	0.22	15	0.47	17	0.36	1482	247	0.54	6.3	225	0	9	2400	1	6	3	3	3	2	0.666667	3	2	0.666667	2	1	5	4BB	4	B	B	1	1	1	0	1
1	2018-07-21 09:24:00	prolonged protocol	28302	22	27	24.03	1	3	1	0	0	3.3	5.91	42.88	0.68	13	0.47	22	0.27	1484	64.5217	0.48	8.8	150	0	12	1950	1	23	18	16	17	10	0.588235	17	13	0.764706	9	1	5	4AA	4	A	A	1	1	1	1	0
1	2018-09-04 14:30:00	prolonged protocol	29075	29	33	22.23	0	2	2	0	0	5.07	5.64	18	0.38	22	0.46	14	0.5	1488	135.273	0.39	10	225	0	11	2250	1	11	5	5	6	3	0.5	6	3	0.5	1	1	5	4AA	4	A	A	1	1	1	1	0
1	2017-08-29 09:39:00	prolonged protocol	23060	37	40	21.26	0	9	2	0	0	4.68	8.72	45.37	0.23	25	0.37	12	0.28	1489	106.357	0.21	10.2	300	0	12	3450	1	14	12	12	12	9	0.75	12	9	0.75	2	1	5	4AB	4	A	B	1	1	2	0	0
1	2018-09-27 09:23:00	prolonged protocol	26737	27	26	17.78	0	4	2	0	0	6.76	7.53	46.14	0.57	22	0.43	19	1.01	1493	165.889	0.37	9.6	150	0	8	1275	2	9	5	5	5	3	0.6	5	2	0.4	1	1	5	4BB	4	B	B	1	1	1	1	0
1	2017-11-24 13:51:00	prolonged protocol	24397	27	31	24.46	1	1	1	0	1	4.27	5.89	49.03	0.29	23	0.47	20	0.26	1500	115.385	0.27	8	225	1	8	1725	1	13	8	8	8	7	0.875	8	5	0.625	1	1	5	4AB	4	A	B	1	1	1	1	0
1	2018-06-30 10:25:00	prolonged protocol	27885	31	35	25.22	1	6	2	0	0	2.58	8.37	53.38	0.35	14	0.46	13	0.77	1501	166.778	0.74	10.4	225	0	12	3025	1	9	8	8	8	3	0.375	8	3	0.375	3	1	5	4BB	4	B	B	1	1	1	0	1
1	2018-04-19 10:18:00	prolonged protocol	26414	31	37	25.77	0	7	2	0	0	2.82	6.56	42.61	0.29	22	0.39	14	0.16	1509	107.786	0.61	14.6	300	0	9	2700	0	14	6	6	7	4	0.571429	7	3	0.428571	2	1	5	4BB	4	B	B	1	1	1	1	0
1	2018-05-17 10:21:00	prolonged protocol	26962	36	39	23.63	1	8	1	0	0	5.44	7.1	48.43	0.64	19	0.27	16	0.81	1511	188.875	0.53	16.8	225	0	10	2325	1	8	4	4	4	2	0.5	4	3	0.75	2	1	5	4BB	4	B	B	1	1	1	0	1
1	2018-05-16 11:09:00	prolonged protocol	26609	31	39	22.86	0	6	1	0	0	4.97	10.04	37.31	0.21	32	0.41	13	0.31	1511	151.1	0.98	9.3	187.5	0	12	2850	1	10	7	7	7	5	0.714286	7	4	0.571429	3	1	5	4AB	4	A	B	1	1	1	1	0
1	2017-12-26 10:37:00	prolonged protocol	24848	24	31	21.88	0	1	3	0	0	4.01	9.2	26.07	0.39	13	0.39	15	1.44	1512	116.308	0.77	11	200	0	9	1700	1	13	11	11	11	6	0.545455	11	7	0.636364	2	1	5	4BB	4	B	B	1	1	1	1	0
1	2018-01-24 15:02:00	prolonged protocol	25252	31	36	21.37	0	8	2	0	0	4.26	8.4	62.01	0.55	25	0.49	6	1.58	1517	216.714	0.55	9.9	300	0	8	2400	2	7	4	4	4	3	0.75	4	3	0.75	0	1	5	3BB	3	B	B	1	1	1	1	0
1	2018-08-06 14:12:00	prolonged protocol	28595	21	28	24.69	0	1	1	0	0	7.83	5.28	47.41	0.55	32	0.89	24	0.46	1524	95.25	1.26	10.2	175	0	9	1875	1	16	10	10	10	4	0.4	10	9	0.9	6	1	5	4AB	4	A	B	1	1	1	1	0
1	2017-09-22 14:18:00	prolonged protocol	23475	27	47	17.58	0	5	2	0	0	6.56	6.19	51.22	0.34	17	0.74	19	0.71	1528	152.8	1.22	11.2	150	0	9	1613	2	10	9	8	8	4	0.5	8	3	0.375	2	1	5	4BA	4	B	A	1	1	1	1	0
1	2018-08-27 15:48:00	prolonged protocol	28948	33	33	23.23	1	2	1	0	0	3.83	7.16	37.44	0.94	44	1.01	23	0.83	1530	117.692	0.41	9.5	150	0	8	1350	2	13	9	9	10	5	0.5	10	3	0.3	0	1	5	4BC	4	B	C	1	1	1	1	0
1	2017-11-14 10:07:00	prolonged protocol	24250	31	31	17.48	1	6	2	0	0	4.34	5.64	120.54	1.06	70	0.45	13	4.23	1545	154.5	0.59	12.2	150	0	7	1013	1	10	8	7	7	4	0.571429	7	4	0.571429	3	1	5	4AB	4	A	B	1	1	1	1	0
1	2018-06-28 10:24:00	prolonged protocol	27817	39	42	23.01	1	4	1	0	0	3.6	6.59	37.42	0.55	25	0.83	14	0.74	1546	154.6	0.36	8.6	300	0	14	3375	1	10	6	6	6	3	0.5	6	4	0.666667	2	1	5	4AB	4	A	B	1	1	1	1	0
1	2018-07-02 10:53:00	prolonged protocol	27910	29	29	19.05	0	1	4	0	0	7.22	5.01	49.39	0.28	16	0.47	21	0.5	1555	91.4706	0.47	12.5	112.5	0	12	2175	1	17	14	13	14	4	0.285714	14	4	0.285714	2	1	5	4AB	4	A	B	1	1	1	1	0
1	2018-09-05 09:56:00	prolonged protocol	29095	37	39	27.06	1	1	1	0	0	1.91	6.43	56.1	0.24	20	0.46	13	0.1	1559	194.875	0.68	13.1	300	0	12	3450	2	8	5	5	5	3	0.6	5	1	0.2	0	1	5	4BB	4	B	B	1	1	2	0	0
1	2018-05-07 11:05:00	prolonged protocol	26750	37	36	20.81	1	11	1	0	0	7.09	6.55	44.31	0.12	13	0.51	14	0.12	1562	120.154	0.85	11.7	225	0	14	2400	1	13	10	10	12	2	0.166667	12	7	0.583333	4	1	5	4BB	4	B	B	1	1	1	1	0
1	2017-05-05 08:41:00	prolonged protocol	21119	28	31	37.34	0	3	2	0	1	2.65	6.03	29.15	0.13	29	0.21	19	0.3	1567	87.0556	0.5	13.4	225	0	11	2250	2	18	13	12	12	6	0.5	12	7	0.583333	4	1	5	5AB	5	A	B	1	1	1	1	0
1	2018-06-07 11:17:00	prolonged protocol	27388	29	37	20.81	1	1	1	0	0	2.25	7.29	40.59	0.42	26	0.83	13	0.36	1571	130.917	0.79	11.1	187.5	0	10	2325	1	12	8	8	10	6	0.6	10	6	0.6	6	1	5	4AB	4	A	B	1	1	1	1	0
1	2018-07-16 10:43:00	prolonged protocol	28196	29	30	21.23	1	1	1	0	1	13.94	5.23	44.98	0.31	23	0.27	25	0.27	1573	74.9048	0.46	12.3	100	0	10	975	2	21	15	15	16	4	0.25	16	7	0.4375	4	1	5	4AB	4	A	B	1	1	1	1	0
1	2018-03-26 10:56:00	prolonged protocol	25901	37	39	21.91	1	2	3	0	0	2.8	7.7	20	0.45	51	0.29	10	0.31	1578	157.8	0.7	10.2	300	0	10	3000	1	10	6	6	6	4	0.666667	6	3	0.5	2	1	5	4BB	4	B	B	1	1	1	1	0
1	2018-03-02 14:25:00	prolonged protocol	25545	35	37	18.22	1	5	3	0	0	4.56	9.09	30.66	0.44	13	0.21	13	0.51	1581	175.667	0.31	9.8	225	0	9	2225	1	9	6	6	7	3	0.428571	7	3	0.428571	1	1	5	4BB	4	B	B	1	1	1	1	0
1	2017-10-23 14:19:00	prolonged protocol	23930	25	25	18.14	1	1	3	0	0	8.94	5.22	25.6	0.54	22	0.47	16	0.37	1582	158.2	0.45	12.3	150	0	13	1500	1	10	8	8	8	7	0.875	8	7	0.875	4	1	5	5BB	5	B	B	1	1	1	1	0
1	2018-07-30 10:22:00	prolonged protocol	28444	30	33	24.03	0	3	3	1	0	2.1	7.7	33.55	0.46	21	0.9	13	0.45	1590	198.75	1.12	11	187.5	0	13	3900	2	8	6	6	6	3	0.5	6	1	0.166667	1	1	5	4BA	4	B	A	1	1	1	1	0
1	2018-06-19 15:00:00	prolonged protocol	27642	30	31	17.78	0	6	1	0	0	2.96	7.12	51.82	0.47	24	0.21	8	0.94	1591	265.167	1.09	10.9	225	1	10	2250	1	6	5	5	5	3	0.6	5	3	0.6	2	1	5	4BB	4	B	B	1	1	1	1	0
1	2017-07-26 09:28:00	prolonged protocol	22498	34	41	18.29	0	8	2	0	0	4.58	8.08	59.79	0.39	22	0.35	15	0.41	1593	99.5625	0.76	14.7	225	0	13	3225	1	16	10	10	10	5	0.5	10	7	0.7	3	1	5	4AA	4	A	A	1	1	1	1	0
1	2017-11-10 09:49:00	prolonged protocol	24205	30	30	21.83	1	1	3	0	1	6.21	6.48	45.46	0.3	16	0.48	25	0.56	1600	160	0.85	9.5	100	0	13	1725	1	10	10	9	9	8	0.888889	9	5	0.555556	1	1	5	4AB	4	A	B	1	1	1	0	1
1	2017-11-17 15:44:00	prolonged protocol	24305	21	32	21.48	0	2	4	0	0	3.46	5.57	55.7	0.55	22	0.97	21	0.57	1601	84.2632	0.51	8.7	112.5	0	12	1650	1	19	17	17	17	4	0.235294	17	13	0.764706	8	1	5	4BA	4	B	A	1	1	1	0	1
1	2017-12-29 09:39:00	prolonged protocol	24880	24	31	29.14	0	2	3	0	1	4.54	5.97	43.66	0.18	17	0.9	38	0.37	1601	114.357	0.41	12.8	112.5	1	20	4313	1	14	7	7	7	2	0.285714	7	1	0.142857	1	1	5	4BB	4	B	B	1	1	1	1	0
1	2018-07-31 08:33:00	prolonged protocol	28465	24	24	15.63	1	1	1	0	0	4.41	10.33	38.31	0.65	43	0.51	10	1.61	1608	229.714	0.89	10.2	225	0	13	2925	1	7	4	4	4	1	0.25	4	3	0.75	1	1	5	4AB	4	A	B	1	1	1	1	0
1	2017-10-13 14:55:00	prolonged protocol	23784	26	27	19.23	0	4	1	0	0	5.75	5.27	49.38	0.14	17	0.45	16	0.47	1611	84.7895	1.31	9.8	225	0	11	2400	1	19	10	10	11	6	0.545455	11	8	0.727273	4	1	5	4AB	4	A	B	1	1	1	1	0
1	2017-09-25 11:11:00	prolonged protocol	23496	30	32	24.34	1	1	2	0	0	8.59	8.92	37.84	0.43	29	0.77	10	0.42	1620	162	0.26	10.5	112.5	0	14	3075	1	10	5	5	5	3	0.6	5	4	0.8	1	1	5	4BB	4	B	B	1	1	1	1	0
1	2017-08-25 08:37:00	prolonged protocol	19978	30	31	21.72	1	9	2	0	0	2.25	2.51	49.54	0.33	29	0.35	21	0.24	1627	147.909	0.22	10.8	225	0	10	2363	1	11	10	10	10	6	0.6	10	7	0.7	4	1	5	4AA	4	A	A	1	1	1	0	1
1	2018-03-27 13:50:00	prolonged protocol	25941	31	34	22.22	1	2	1	0	0	5.28	7.19	49.49	0.37	27	0.48	7	0.6	1628	162.8	0.94	12.7	300	0	14	4800	1	10	7	7	8	5	0.625	8	4	0.5	2	1	5	4BB	4	B	B	1	1	1	1	0
1	2018-01-26 10:45:00	prolonged protocol	25263	35	36	21.09	1	2	2	0	0	6.87	8.77	74.75	0.24	24	0.31	15	0.64	1629	148.091	0.93	12.1	262.5	0	9	2250	1	11	8	8	9	2	0.222222	9	3	0.333333	3	1	5	4AB	4	A	B	1	1	1	0	1
1	2018-08-17 10:15:00	prolonged protocol	28796	27	27	28.34	1	2	1	0	0	6.2	8.18	43.6	0.19	25	0.45	28	0.36	1655	150.455	0.44	9	150	0	17	3000	1	11	8	8	8	5	0.625	8	4	0.5	3	1	5	4AB	4	A	B	1	1	1	1	0
1	2018-06-19 09:35:00	prolonged protocol	27620	22	25	25.51	0	3	1	0	0	5.03	7.13	37.28	0.29	20	0.63	17	0.45	1657	110.467	1.04	7.3	150	0	10	2178	0	15	7	7	7	2	0.285714	7	1	0.142857	0	1	5	4AA	4	A	B	1	1	1	1	0
1	2017-11-09 15:16:00	prolonged protocol	24198	27	29	21.72	0	3	2	0	0	5.48	6.65	68.7	0.85	38	0.49	25	0.72	1658	110.533	0.62	13.7	100	0	13	2200	1	15	10	10	10	8	0.8	10	5	0.5	2	1	5	4BA	4	B	A	1	1	1	1	0
1	2017-02-24 13:44:00	prolonged protocol	19853	26	31	19.14	0	3	1	0	1	5.14	6.24	39.6	0.56	15	0.36	18	0.33	1660	87.3684	0.21	10	150	0	10	1275	1	19	13	13	15	5	0.333333	15	6	0.4	3	1	5	4AB	4	A	B	1	1	1	1	0
1	2018-09-03 09:27:00	prolonged protocol	29033	33	31	21.61	1	4	2	0	0	6.65	9.79	85.41	0.78	17	0.73	11	1.33	1663	138.583	0.87	10	225	0	10	2175	2	12	8	8	8	4	0.5	8	5	0.625	4	1	5	4BA	4	B	A	1	0	2	0	0
1	2018-09-20 09:07:00	prolonged protocol	29314	31	31	22.06	1	1	1	0	0	3.35	8.18	33.19	0.23	18	0.36	14	0.12	1663	97.8235	0.74	10	225	0	9	1875	1	17	11	11	12	8	0.666667	12	6	0.5	3	1	5	4BA	4	B	A	1	1	1	1	0
1	2017-10-13 11:42:00	prolonged protocol	23776	28	27	16.33	0	3	1	1	0	8.41	3.87	57	0.35	15	0.21	13	0.6	1666	166.6	0.34	12.1	150	1	13	1950	1	10	9	9	10	6	0.6	10	7	0.7	4	1	5	4AB	4	A	B	1	1	1	1	0
1	2018-07-19 09:05:00	prolonged protocol	25383	33	31	20	1	4	1	0	0	2.9	9.58	19.52	0.26	30	0.57	8	0.7	1667	277.833	0.9	10.3	225	0	15	3600	1	6	4	4	4	1	0.25	4	1	0.25	0	1	5	4BC	4	B	C	1	1	1	1	0
1	2018-05-29 11:01:00	prolonged protocol	27192	34	36	23.26	1	2	3	1	0	6.32	10.21	45.27	0.34	20	0.55	17	0.23	1667	138.917	0.85	10.8	225	0	15	3975	1	12	8	8	8	3	0.375	8	3	0.375	2	1	5	4BB	4	B	B	1	1	1	1	0
1	2018-03-09 10:51:00	prolonged protocol	25659	32	39	18.83	1	4	1	0	0	2.66	7.88	31.51	0.36	26	2.11	11	0.42	1668	417	1.06	8.2	225	0	13	3375	1	4	4	4	4	3	0.75	4	4	1	3	1	5	4AB	4	A	B	1	1	1	1	0
1	2018-04-03 14:24:00	prolonged protocol	26110	27	29	23.88	1	2	2	0	0	2.83	5.78	40.74	0.22	28	0.39	19	0.23	1671	185.667	0.52	12.4	187.5	0	12	2363	1	9	8	8	8	2	0.25	8	1	0.125	0	1	5	3BB	3	B	B	1	1	1	1	0
1	2018-03-30 09:53:00	prolonged protocol	26016	29	32	20.31	0	4	1	0	0	13.23	9.05	89.3	0.52	31	0.61	10	0.31	1677	119.786	0.62	10.7	225	0	13	3525	1	14	10	10	10	5	0.5	10	5	0.5	2	1	5	4BB	4	B	B	1	1	1	1	0
2	2018-07-26 14:24:00	prolonged protocol	28393	34	35	22.27	1	2	3	0	0	3.24	7.23	36.66	0.16	25	0.66	12	0.9	1686	112.4	0.77	17	225	0	12	2475	2	15	11	11	12	9	0.75	12	3	0.25	2	1	5	4BB	4	B	B	1	1	1	1	0
2	2017-08-15 11:13:00	prolonged protocol	22822	27	32	19.68	0	1	3	0	0	4.48	5.43	67.75	0.07	32	0.44	14	0.09	1686	112.4	0.25	10.5	150	0	10	1500	2	15	13	13	13	5	0.384615	13	2	0.153846	1	1	5	4BA	4	B	A	1	1	1	1	0
2	2017-03-08 10:53:00	prolonged protocol	7763	37	39	22.65	1	3	3	0	1	2.09	4.56	46.2	0.57	22	0.75	16	0.42	1696	106	0.43	13.1	225	0	12	2550	1	16	12	11	13	7	0.538462	13	7	0.538462	3	1	5	4AB	4	A	B	1	1	1	1	0
2	2018-03-28 09:53:00	prolonged protocol	25964	26	30	22.58	0	2	3	0	0	8.14	7.94	54.9	0.35	24	0.39	19	0.13	1700	154.545	0.72	12	200	0	10	2375	2	11	9	9	9	6	0.666667	9	7	0.777778	4	1	5	4BA	4	B	A	1	1	1	1	0
2	2017-10-24 16:13:00	prolonged protocol	23964	32	32	26.35	1	4	4	0	0	5.93	8.08	26.45	0.35	24	0.51	15	0.28	1706	106.625	1.22	10.5	225	0	12	3150	1	16	15	14	14	7	0.5	14	11	0.785714	4	1	5	4AB	4	A	B	1	0	2	0	0
2	2017-07-17 11:10:00	prolonged protocol	22329	27	28	23.61	0	2	1	0	0	7.17	10.29	53.85	0.46	31	0.53	19	0.62	1707	170.7	0.34	12	150	0	14	2325	1	10	7	7	8	5	0.625	8	6	0.75	3	1	5	4BB	4	B	B	1	1	1	1	0
2	2018-04-03 10:29:00	prolonged protocol	25433	26	28	19.14	0	1	3	0	0	5.05	6.36	49.5	0.44	12	0.34	13	0.63	1713	122.357	1.11	9.6	300	0	8	2400	0	14	13	12	13	1	0.0769231	13	5	0.384615	1	1	5	4BB	4	B	B	1	1	1	0	1
2	2018-08-20 14:55:00	prolonged protocol	28853	32	32	26.91	1	7	3	0	1	3.37	5.91	43.38	0.22	24	0.48	21	0.38	1713	190.333	0.56	14.7	150	0	12	2250	1	9	6	6	7	4	0.571429	7	3	0.428571	3	1	5	4BB	4	B	B	1	1	1	1	0
2	2018-03-29 16:43:00	prolonged protocol	26004	33	33	20.17	0	4	1	0	0	4.68	11.82	26.96	0.51	29	0.24	6	0.7	1714	244.857	0.5	10.3	300	0	16	4800	1	7	4	4	4	3	0.75	4	3	0.75	3	1	5	5BB	5	B	B	1	1	1	1	0
2	2017-11-07 10:37:00	prolonged protocol	21907	27	28	24.65	0	3	1	0	0	6.94	8.39	53.48	0.19	17	0.48	25	0.21	1717	85.85	0.57	12.2	150	0	12	2550	1	20	11	9	9	4	0.444444	9	5	0.555556	3	1	5	4AB	4	A	B	1	1	1	1	0
2	2017-10-12 08:33:00	prolonged protocol	23741	29	31	21.8	0	1	1	0	0	8.69	4.51	61.21	0.77	16	0.31	25	0.61	1726	215.75	0.6	15.5	100	1	9	825	1	8	6	6	6	4	0.666667	6	3	0.5	2	1	5	4AB	4	A	B	1	1	1	1	0
2	2018-05-17 11:40:00	prolonged protocol	21844	34	39	26.04	1	5	2	0	0	2.54	5.23	20.67	0.31	22	0.21	21	0.53	1727	82.2381	0.85	8.4	225	1	8	2025	1	21	18	18	18	12	0.666667	18	9	0.5	8	1	5	4BB	4	B	B	1	1	1	0	1
2	2018-08-07 14:12:00	prolonged protocol	28631	34	37	20.31	1	10	3	0	0	11.38	7.29	20.86	0.56	25	0.63	17	1.24	1733	101.941	1.05	11	225	0	10	1950	1	17	13	12	12	3	0.25	12	4	0.333333	3	1	5	4BB	4	B	B	1	1	1	1	0
2	2017-09-19 09:18:00	prolonged protocol	17930	30	30	23.92	1	3	1	0	0	6.51	9.3	40.02	0.42	30	0.35	16	0.66	1736	248	0.63	6.6	112.5	0	9	1800	1	7	7	6	7	4	0.571429	7	5	0.714286	3	1	5	3BB	3	B	B	1	1	1	1	0
2	2018-06-21 10:48:00	prolonged protocol	27678	28	34	26.57	1	2	3	0	1	6.58	7.1	37.57	0.54	39	0.21	30	0.88	1738	158	0.41	11.7	112.5	0	14	2050	1	11	6	6	7	3	0.428571	7	5	0.714286	3	1	5	4AB	4	A	B	1	1	1	1	0
2	2017-09-08 11:05:00	prolonged protocol	23245	38	40	25.15	1	1	1	0	0	3.07	5.4	39.27	0.12	27	0.69	16	0.12	1746	134.308	0.61	8.7	187.5	0	11	2775	1	13	8	8	9	7	0.777778	9	6	0.666667	3	1	5	4BB	4	B	B	1	1	1	1	0
2	2018-01-29 14:51:00	prolonged protocol	24604	29	32	23.05	0	3	1	0	0	4.64	7.2	38.71	0.51	39	0.6	18	0.58	1747	116.467	0.8	10.9	150	0	9	1350	0	15	6	6	8	5	0.625	8	5	0.625	1	1	5	4BB	4	B	B	1	1	1	1	0
2	2017-05-08 14:20:00	prolonged protocol	21164	34	38	19.92	1	9	2	0	0	5.51	6.72	39.38	0.93	27	0.21	20	1.21	1747	97.0556	0.75	9.7	150	0	9	1613	1	18	12	12	12	4	0.333333	12	4	0.333333	3	1	5	4AB	4	A	B	1	1	1	1	0
2	2017-05-29 11:54:00	prolonged protocol	21508	26	29	17.53	1	1	1	0	0	4.3	5.3	29	0.31	17	0.56	23	0.55	1751	72.9583	0.72	9.6	150	1	9	1350	1	24	18	18	20	9	0.45	20	11	0.55	8	1	5	4AB	4	A	B	1	1	1	0	1
2	2018-08-10 09:36:00	prolonged protocol	28680	29	27	20.31	0	3	4	0	1	5.28	5.67	40.59	0.83	20	0.87	19	0.53	1762	220.25	0.97	10.4	112.5	0	11	1200	1	8	6	6	6	5	0.833333	6	3	0.5	2	1	5	4BB	4	B	B	1	1	1	1	0
2	2017-08-22 11:00:00	prolonged protocol	22952	29	33	24.04	0	6	1	0	0	1.88	5.89	30.81	0.07	27	0.54	8	0.13	1767	126.214	0.76	13.7	225	0	11	2475	1	14	12	12	12	7	0.583333	12	4	0.333333	2	1	5	4AB	4	A	B	1	0	2	0	0
2	2018-06-15 11:12:00	prolonged protocol	27576	30	33	22.16	0	1	2	0	0	13.55	7.15	38.74	0.45	23	0.76	29	0.37	1774	98.5556	0.73	10.4	112.5	0	15	2775	1	18	15	14	15	4	0.266667	15	8	0.533333	4	1	5	4BA	4	B	A	1	1	1	1	0
2	2018-08-15 10:53:00	prolonged protocol	28757	39	41	19.72	1	2	1	0	0	4.46	8.74	46.44	0.67	19	0.28	7	1.2	1776	222	0.68	11.2	300	0	13	4275	1	8	5	4	5	0	0	5	3	0.6	1	1	5	4BB	4	B	B	1	1	1	1	0
2	2017-03-24 09:45:00	prolonged protocol	20390	37	41	24.97	1	8	3	0	0	1.37	7.87	65.16	0.36	27	0.35	12	0.41	1779	177.9	0.78	10	225	0	11	2475	1	10	9	9	9	4	0.444444	9	7	0.777778	4	1	5	4AA	4	A	A	1	1	1	1	0
2	2017-10-20 11:22:00	prolonged protocol	23887	28	28	20.94	1	2	1	1	0	3.92	8.19	35.16	0.46	16	0.37	9	0.6	1786	198.444	0.72	10.9	225	0	12	2775	1	9	5	5	5	4	0.8	5	4	0.8	4	1	5	4AB	4	A	B	1	1	1	1	0
2	2017-10-12 15:12:00	prolonged protocol	20897	31	32	20.81	1	1	2	0	0	2.53	5.52	48.11	0.13	23	0.63	14	0.17	1789	149.083	1.51	10.5	187.5	0	11	2175	0	12	9	9	9	5	0.555556	9	3	0.333333	2	1	5	4BA	4	B	A	1	1	1	1	0
2	2018-04-02 14:46:00	prolonged protocol	26073	31	34	21.09	1	2	2	0	1	7.39	5.76	41.12	0.47	21	1.13	12	1.36	1789	137.615	1.35	9	225	0	8	1800	1	13	11	11	11	8	0.727273	11	8	0.727273	6	1	5	4AB	4	A	B	1	1	1	1	0
2	2017-09-02 10:40:00	prolonged protocol	23121	30	33	22.06	1	1	3	0	1	3.86	6.27	32.38	0.25	12	0.26	18	0.91	1790	179	0.4	8	112.5	0	12	1650	1	10	6	6	6	2	0.333333	6	4	0.666667	3	1	5	4AB	4	A	B	1	1	1	1	0
2	2017-09-28 09:47:00	prolonged protocol	23556	34	34	27.06	0	2	2	0	0	9.66	8.21	55.05	0.48	18	0.71	14	0.17	1792	224	1.03	18	225	0	24	6450	1	8	8	7	7	5	0.714286	7	4	0.571429	2	1	5	4BB	4	B	B	1	1	1	1	0
2	2017-09-07 09:18:00	prolonged protocol	23195	34	33	24.61	1	3	4	0	0	5.26	5.3	47.8	0.11	12	0.26	10	0.57	1792	162.909	0.43	15.6	300	0	10	3000	1	11	8	8	8	5	0.625	8	6	0.75	6	1	5	4BB	4	B	B	1	1	1	1	0
2	2018-05-15 11:03:00	prolonged protocol	26915	32	34	18.07	0	4	3	0	0	4.33	14.39	69.41	0.2	12	0.39	8	0.33	1795	224.375	0.7	11.1	225	0	14	3525	1	8	8	8	8	4	0.5	8	5	0.625	5	1	5	4BB	4	B	B	1	1	1	0	1
2	2018-02-28 14:01:00	prolonged protocol	25506	33	50	20.2	1	2	2	0	0	1.74	6.33	25.91	0.3	20	0.27	11	0.67	1800	128.571	0.81	10.2	225	0	10	2213	2	14	11	11	12	11	0.916667	12	11	0.916667	4	1	5	4BB	4	B	B	1	1	1	1	0
2	2018-05-11 10:53:00	prolonged protocol	26850	29	27	24.61	0	8	1	0	0	2.79	8.08	42.19	0.07	16	0.55	20	0.21	1814	259.143	0.34	13.6	112.5	0	14	1625	1	7	7	7	7	6	0.857143	7	5	0.714286	4	1	5	4BB	4	B	B	1	1	1	1	0
2	2017-08-10 15:32:00	prolonged protocol	22686	33	33	31.22	0	4	3	0	0	4.3	6.99	25.31	0.12	26	0.39	21	0.29	1821	101.167	0.42	13.4	150	0	12	2325	1	18	16	15	15	8	0.533333	15	10	0.666667	5	1	5	4AB	4	A	B	1	1	1	1	0
2	2018-09-27 10:59:00	prolonged protocol	29430	32	33	28.3	1	1	3	0	0	4.2	9.47	48.19	0.25	22	0.49	10	0.29	1825	228.125	1.45	10.6	300	0	15	4875	1	8	8	8	8	5	0.625	8	8	1	4	1	5	4AB	4	A	B	1	1	1	0	1
2	2017-06-26 09:29:00	prolonged protocol	20625	30	34	17.91	1	5	4	0	0	5.65	5.21	55.84	0.77	23	0.34	16	1.5	1831	76.2917	0.21	11.2	150	0	10	1500	1	24	14	14	14	7	0.5	14	6	0.428571	3	1	5	4AB	4	A	B	1	1	1	1	0
2	2018-07-18 08:34:00	prolonged protocol	28247	30	35	20.76	1	3	2	0	0	4.88	5.83	53.64	0.51	17	0.97	12	1.53	1849	184.9	0.47	14.8	225	0	13	2925	1	10	8	8	10	6	0.6	10	7	0.7	4	1	5	4BB	4	B	B	1	0	2	0	0
2	2018-10-03 09:49:00	prolonged protocol	29501	26	27	19.22	0	4	3	0	0	6.66	7.97	35.3	0.19	12	0.44	10	0.66	1856	185.6	0.97	10.2	300	0	12	3450	1	10	8	8	8	6	0.75	8	5	0.625	2	1	5	4BB	4	B	B	1	1	1	1	0
2	2018-07-10 10:03:00	prolonged protocol	28094	31	35	22.83	0	5	2	0	0	2.93	5.71	65.66	0.35	12	1.09	13	0.64	1860	206.667	0.68	9.8	225	0	12	2738	1	9	7	7	7	3	0.428571	7	4	0.571429	3	1	5	4AB	4	A	B	1	1	1	1	0
2	2018-08-13 14:46:00	prolonged protocol	28724	30	30	24.03	0	14	1	0	1	7.62	8.45	72.94	0.59	15	0.46	23	0.57	1868	155.667	0.89	10.8	187.5	0	8	1800	1	12	8	7	7	4	0.571429	7	5	0.714286	4	1	5	4BB	4	B	B	1	1	1	1	0
2	2018-03-02 10:51:00	prolonged protocol	25535	42	48	28.52	1	5	1	0	1	5.74	7.91	31.1	0.16	12	0.35	12	0.15	1873	156.083	0.52	12.6	262.5	0	12	2700	1	12	9	9	11	4	0.363636	11	3	0.272727	1	1	5	4AB	4	A	B	1	1	1	1	0
2	2018-06-01 10:36:00	prolonged protocol	19799	31	34	17.63	0	3	2	1	1	6.73	5.17	47.61	0.34	14	0.27	23	0.48	1878	234.75	0.37	15	100	1	10	1050	2	8	6	6	6	3	0.5	6	4	0.666667	0	1	5	3AB	3	A	B	1	0	2	0	0
2	2016-09-20 10:08:00	prolonged protocol	13901	33	34	23.5	1	5	1	0	0	1.18	4.26	35.28	0.1	42	0.2	14	0.16	1885	125.667	0.2	10.4	225	0	14	3825	1	15	14	14	14	7	0.5	12	7	0.583333	1	1	5	4AB	4	A	B	1	1	1	0	1
2	2018-07-17 10:54:00	prolonged protocol	28233	25	26	18.9	1	1	1	0	0	5.16	6.83	34	0.37	28	0.77	12	0.83	1890	145.385	0.82	11.5	187.5	1	10	2175	1	13	9	9	9	7	0.777778	9	3	0.333333	1	1	5	4BA	4	B	A	1	1	1	1	0
2	2018-06-14 15:48:00	prolonged protocol	27541	35	38	21.48	0	6	1	1	0	2.99	6.62	35.39	0.95	23	0.3	10	0.82	1897	210.778	0.62	15.2	225	0	12	3075	1	9	7	7	8	7	0.875	8	6	0.75	2	1	5	4AB	4	A	B	1	0	2	0	0
2	2017-08-28 10:23:00	prolonged protocol	23042	30	31	20.76	0	4	2	0	0	5.53	7.83	37.69	0.07	27	0.41	19	0.59	1904	146.462	0.21	10.7	225	0	11	2025	2	13	12	12	12	11	0.916667	12	9	0.75	4	1	5	3AB	3	A	B	1	1	1	1	0
2	2018-07-18 09:13:00	prolonged protocol	28251	24	30	20	1	1	1	0	0	3.35	6.12	32.41	0.43	31	0.97	15	0.44	1916	91.2381	1.11	10	250	0	11	2550	1	21	16	16	16	9	0.5625	16	7	0.4375	4	1	5	4AB	4	A	B	1	1	1	1	0
2	2018-08-21 10:44:00	prolonged protocol	27622	33	33	21.23	0	4	1	0	0	2.89	4.84	97.53	0.85	44	0.71	19	0.88	1917	174.273	0.82	8.2	150	0	7	1050	0	11	8	8	8	2	0.25	8	2	0.25	2	1	5	4BA	4	B	A	1	1	1	1	0
2	2017-11-22 10:21:00	prolonged protocol	24355	36	40	20.13	1	7	1	0	0	3.14	4.62	61.59	0.59	20	0.67	10	1.05	1924	240.5	0.58	15.3	225	1	11	2700	1	8	8	8	8	7	0.875	8	6	0.75	4	1	5	4AB	4	A	B	1	1	1	1	0
2	2018-06-19 16:32:00	prolonged protocol	26066	28	30	21.21	0	4	2	0	0	4.86	4.46	41.3	0.44	35	0.62	20	0.71	1925	213.889	0.64	6.2	150	0	9	1350	1	9	6	6	6	1	0.166667	6	5	0.833333	3	1	5	5BB	5	B	B	1	1	1	1	0
2	2017-10-04 12:48:00	prolonged protocol	23634	37	37	22.27	1	7	3	0	0	6.78	5.68	54.7	0.47	12	0.21	14	0.51	1931	175.545	0.39	17.6	225	0	10	2250	1	11	9	8	9	5	0.555556	9	9	1	7	1	5	6AB	6	A	B	1	1	1	0	1
2	2017-07-14 11:19:00	prolonged protocol	22288	24	35	20.03	0	1	3	0	0	12.41	6.42	63.17	0.44	30	0.79	26	0.43	1931	137.929	0.54	11.9	112.5	0	8	900	1	14	10	10	12	9	0.75	12	8	0.666667	4	1	5	4AA	4	A	A	1	1	1	1	0
2	2018-07-06 11:22:00	prolonged protocol	28010	35	38	22.66	1	1	1	0	0	3.28	7.85	37.45	0.33	28	0.74	12	1.81	1940	114.118	1.14	9.5	300	0	10	2625	1	17	11	11	12	7	0.583333	12	7	0.583333	5	1	5	4BA	4	B	A	1	1	1	1	0
2	2018-06-27 11:36:00	prolonged protocol	26181	31	30	19.63	1	2	2	0	0	6.53	11.42	47.87	0.81	15	0.46	23	0.45	1945	92.619	0.38	11	112.5	0	12	1850	1	21	16	15	15	9	0.6	15	7	0.466667	3	1	5	4AB	4	A	B	1	1	1	1	0
2	2017-09-13 16:25:00	prolonged protocol	23316	27	28	18.82	0	2	2	0	0	5.53	6.72	60.09	0.57	24	0.32	19	0.65	1947	121.688	1.14	11.1	150	0	9	1500	1	16	14	14	15	9	0.6	15	9	0.6	8	1	5	5BB	5	B	B	1	1	1	1	0
2	2018-04-08 11:34:00	prolonged protocol	26191	33	36	19.14	1	2	3	0	0	3.12	6.58	65.01	0.68	35	0.47	12	0.73	1948	243.5	1.13	12.1	225	0	13	3750	1	8	6	6	6	2	0.333333	6	4	0.666667	2	1	5	4BB	4	B	B	1	1	1	1	0
2	2017-10-10 11:23:00	prolonged protocol	23704	28	30	22.23	1	1	3	0	0	2.22	5.41	45.48	0.07	19	0.32	14	0.23	1952	130.133	1.26	11.9	150	0	18	3075	1	15	12	12	12	5	0.416667	12	8	0.666667	6	1	5	4AB	4	A	B	1	1	1	1	0
2	2018-09-03 11:18:00	prolonged protocol	5215	33	36	23.42	1	4	1	0	1	4.63	5.55	25.14	0.15	27	0.46	27	0.84	1952	177.455	0.31	12.7	262.5	0	15	3038	1	11	11	11	11	6	0.545455	11	6	0.545455	3	1	5	4AB	4	A	B	1	1	1	1	0
2	2018-04-18 14:20:00	prolonged protocol	26395	31	35	23.53	1	10	3	0	0	4.68	5.93	44.23	0.35	32	0.44	12	0.44	1953	217	1.02	16.3	300	0	10	2700	1	9	8	8	8	8	1	8	4	0.5	2	1	5	4BB	4	B	B	1	1	1	1	0
2	2017-11-28 08:49:00	prolonged protocol	24437	24	28	22.03	1	2	3	0	0	1.99	8.74	61.51	0.64	43	0.59	11	1.18	1962	140.143	0.41	8.7	200	1	8	1550	1	14	11	11	11	5	0.454545	11	7	0.636364	3	1	5	4AB	4	A	B	1	1	1	1	0
2	2017-07-24 14:01:00	prolonged protocol	22461	35	34	31.65	1	7	2	0	1	9.47	6.57	104.3	0.39	26	0.72	10	2.53	1965	140.357	0.21	16.4	225	0	18	4725	2	14	11	11	11	5	0.454545	11	6	0.545455	3	1	5	4AB	4	A	B	1	1	1	1	0
2	2018-04-25 09:14:00	prolonged protocol	26503	28	26	21.48	1	5	3	0	0	2.61	4.37	35.78	0.3	24	0.62	15	0.4	1966	131.067	0.84	10	150	0	9	1500	1	15	10	9	9	4	0.444444	9	7	0.777778	4	1	5	5BB	5	B	B	1	1	1	1	0
2	2017-02-21 09:45:00	prolonged protocol	17320	42	33	18.73	1	3	3	0	0	4.31	4.76	97.82	0.4	23	0.5	8	0.65	1974	219.333	0.78	9	300	1	12	3600	1	9	8	8	8	7	0.875	8	3	0.375	2	1	5	4AB	4	A	B	1	1	1	0	1
2	2017-09-13 11:16:00	prolonged protocol	23309	34	38	22.58	0	15	2	0	0	8.04	4.88	56.2	0.19	12	0.54	17	0.41	1979	94.2381	0.4	12.9	225	0	13	2925	1	21	21	20	19	13	0.684211	19	17	0.894737	8	1	5	4AA	4	A	A	1	1	1	1	0
2	2018-04-24 13:50:00	prolonged protocol	26491	25	33	22.62	0	2	3	0	0	6.8	8.7	53	0.49	43	0.65	18	0.5	1980	220	1.34	12	150	0	11	2100	1	9	6	6	6	4	0.666667	6	5	0.833333	2	1	5	4BB	4	B	B	1	1	1	1	0
2	2018-03-27 09:47:00	prolonged protocol	25925	32	32	21.09	1	1	1	0	0	2.25	6.98	67.51	0.28	21	0.32	16	0.54	1982	247.75	0.27	15.5	225	0	12	2900	1	8	8	8	8	2	0.25	8	7	0.875	6	1	5	4AB	4	A	B	1	1	1	0	1
2	2017-04-14 15:14:00	prolonged protocol	20767	27	29	21.64	0	1	3	0	0	6.82	7.39	55.31	0.07	15	0.21	5	0.39	1982	123.875	0.7	10	225	1	11	2438	1	16	10	9	13	13	1	13	10	0.769231	5	1	5	4AB	4	A	B	1	2	1	1	0
2	2018-03-07 11:26:00	prolonged protocol	25611	34	30	23.83	0	1	1	0	0	6.08	7.06	44.2	0.46	24	0.27	15	0.9	1983	198.3	0.76	13.2	225	0	10	2400	1	10	8	8	8	4	0.5	8	5	0.625	5	1	5	4AB	4	A	B	1	1	1	1	0
2	2017-07-21 11:25:00	prolonged protocol	21050	31	32	19.65	1	1	2	0	0	6.55	11.06	44.28	0.52	36	0.26	14	0.45	1985	99.25	0.45	11.4	150	0	13	1950	1	20	16	15	15	10	0.666667	15	8	0.533333	5	1	5	4AB	4	A	B	1	1	1	0	1
2	2018-03-10 10:41:00	prolonged protocol	25671	28	26	25.39	1	5	2	0	1	6.45	5.14	31.83	0.11	27	0.32	22	0.1	1996	133.067	0.51	11.4	175	0	17	3275	1	15	15	15	15	8	0.533333	15	10	0.666667	4	1	5	5BB	4	B	B	1	1	1	0	1
2	2017-09-26 11:37:00	prolonged protocol	23522	25	27	24.12	0	5	1	0	1	11.45	9.36	45	0.09	34	0.67	29	0.42	2000	250	0.33	9.6	112.5	0	8	900	1	8	6	6	7	5	0.714286	7	6	0.857143	4	1	5	4AB	4	A	B	1	0	2	0	0
2	2018-02-26 08:44:00	prolonged protocol	25451	29	28	18.03	1	5	1	0	0	4.05	8.29	35.34	0.56	21	0.44	17	0.66	2002	143	0.69	13	150	0	8	1200	1	14	9	9	9	4	0.444444	9	5	0.555556	5	1	5	4AB	4	A	B	1	1	1	1	0
2	2018-03-08 08:59:00	prolonged protocol	25625	34	35	20.94	1	3	3	0	0	5.42	7.05	60.07	0.21	13	0.61	16	1.14	2002	77	0.67	13	225	0	11	2725	1	26	20	20	21	10	0.47619	21	8	0.380952	6	1	5	4AB	4	A	B	1	1	1	1	0
2	2018-07-27 08:57:00	prolonged protocol	28395	28	32	26.62	1	5	1	0	1	5.24	7.76	67.97	0.18	51	0.82	25	0.33	2006	154.308	0.34	11.3	150	0	9	1200	1	13	10	10	12	5	0.416667	12	5	0.416667	3	1	5	4BB	4	B	B	1	1	1	1	0
2	2018-06-26 11:07:00	prolonged protocol	27768	29	31	24.03	0	3	2	0	0	4.43	8.92	38.45	0.66	38	0.44	12	2.39	2011	223.444	0.85	7.6	187.5	0	12	3150	2	9	9	8	8	3	0.375	8	3	0.375	2	1	5	4AB	4	A	B	1	1	1	1	0
2	2018-05-12 08:26:00	prolonged protocol	26870	26	24	32.89	1	3	3	0	1	5.78	6.86	42.4	0.18	18	0.54	25	0.22	2012	223.556	0.63	12.1	150	0	16	3225	2	9	7	7	7	4	0.571429	7	5	0.714286	3	1	5	4BB	4	B	B	1	1	1	1	0
2	2017-08-09 13:45:00	prolonged protocol	22745	29	37	26.3	0	3	2	0	1	2.36	6.69	38.33	0.07	28	0.53	27	0.26	2012	111.778	0.75	10.4	150	0	14	2513	2	18	14	14	14	8	0.571429	14	11	0.785714	5	1	5	4AB	4	A	B	1	1	1	1	0
2	2017-07-05 10:21:00	prolonged protocol	22122	29	31	20.89	0	3	1	0	0	7.8	9.33	52.08	0.56	17	0.21	17	0.48	2017	126.062	0.29	11.3	150	0	10	1350	1	16	10	8	10	6	0.6	10	8	0.8	3	1	5	4AB	4	A	B	1	0	2	0	0
2	2017-03-06 16:27:00	prolonged protocol	20045	27	28	25.81	0	3	1	0	0	2.12	2.9	73	0.41	32	0.6	19	0.39	2019	134.6	0.23	15.8	150	0	11	1650	1	15	11	11	12	6	0.5	12	8	0.666667	3	1	5	4AB	4	A	B	2	1	1	1	0
2	2018-03-12 10:37:00	prolonged protocol	25690	21	28	25.55	1	4	1	0	0	2.13	5.97	32.07	1.01	31	0.73	15	5.01	2024	184	0.34	9.1	150	0	10	1875	0	11	9	8	9	3	0.333333	9	4	0.444444	2	1	5	4BB	4	B	B	1	1	1	1	0
2	2018-08-01 08:20:00	prolonged protocol	28495	33	39	24.09	1	1	1	0	0	4.26	8.37	43.51	0.46	13	1.06	15	0.36	2025	92.0455	0.31	10.4	225	1	11	2025	1	22	17	17	18	7	0.388889	18	10	0.555556	6	1	5	4AB	4	A	B	1	1	1	1	0
2	2018-06-21 15:36:00	prolonged protocol	27691	26	28	20.83	0	1	2	0	0	4.79	8.82	42.22	1.01	35	0.31	19	1.72	2027	168.917	0.3	12.3	150	0	7	1050	1	12	7	7	7	3	0.428571	7	3	0.428571	2	1	5	4BA	4	B	A	1	1	1	0	1
2	2017-12-06 09:17:00	prolonged protocol	24554	28	28	18.31	1	2	1	0	0	4.74	5.41	22	0.34	18	0.65	11	0.12	2028	92.1818	0.32	7.8	225	0	12	2775	1	22	12	12	12	2	0.166667	12	4	0.333333	2	1	5	4BB	4	B	B	1	1	1	1	0
2	2018-05-30 08:39:00	prolonged protocol	27200	37	38	21.64	1	4	2	0	0	3.79	7.54	70	0.32	16	0.27	14	0.28	2036	226.222	0.57	11.5	200	0	12	2800	1	9	5	4	4	3	0.75	4	4	1	4	1	5	4BA	4	B	A	1	1	1	1	0
2	2018-05-25 10:32:00	prolonged protocol	27122	26	28	20.31	1	4	1	0	0	3.29	8.32	34.65	0.67	21	0.25	14	1.05	2038	156.769	0.46	8.1	150	0	10	1875	1	13	12	11	11	5	0.454545	11	3	0.272727	3	1	5	4AB	4	A	B	1	1	1	1	0
2	2018-01-26 09:17:00	prolonged protocol	25262	37	37	22.89	1	5	2	0	0	6.06	5.94	46.1	0.64	19	0.75	13	1.04	2038	203.8	1.12	12.2	225	0	10	2175	1	10	9	9	10	4	0.4	10	4	0.4	3	1	5	4AB	4	A	B	2	1	1	1	0
2	2018-04-27 10:11:00	prolonged protocol	26553	28	31	23.63	1	2	3	0	0	2.66	5.43	17.96	0.33	18	0.62	26	0.5	2043	145.929	1.07	10.8	150	0	14	2625	1	14	13	13	14	6	0.428571	14	8	0.571429	4	1	5	4BB	4	B	B	1	1	1	1	0
2	2017-10-10 10:10:00	prolonged protocol	23699	34	31	19.53	1	1	3	0	0	5.33	10.08	55.55	0.38	21	0.82	15	0.34	2050	205	0.33	12.7	225	0	13	3300	1	10	7	7	9	6	0.666667	9	5	0.555556	4	1	5	4BB	4	B	B	1	1	1	0	1
2	2018-03-09 10:37:00	prolonged protocol	25658	30	31	23.44	0	4	2	0	0	3.69	5.86	39.51	0.59	28	0.56	18	0.73	2061	206.1	0.71	13.2	150	0	11	1350	2	10	9	9	9	5	0.555556	9	5	0.555556	1	1	5	4BB	4	B	B	1	1	1	1	0
2	2018-02-27 14:22:00	prolonged protocol	25489	32	32	19.07	1	2	1	0	0	3.79	7.79	29.05	0.42	26	0.24	18	0.49	2069	206.9	0.26	12.2	150	0	8	1300	1	10	7	7	7	5	0.714286	7	5	0.714286	2	1	5	4BB	4	B	B	1	1	1	1	0
2	2018-07-24 09:58:00	prolonged protocol	28340	29	30	21.93	0	4	1	0	0	7.8	8.51	38.31	0.37	15	0.53	20	0.54	2070	147.857	0.21	13.4	150	0	11	1650	2	14	10	10	10	10	1	10	9	0.9	7	1	5	4AB	4	A	B	1	0	2	0	0
2	2018-07-31 11:14:00	prolonged protocol	28484	36	38	21.3	1	4	2	1	0	6.78	8.94	60.61	0.27	14	0.39	16	0.22	2073	207.3	1.04	13.4	187.5	0	12	2850	2	10	9	9	9	6	0.666667	9	6	0.666667	3	1	5	4BB	4	B	B	1	1	1	1	0
2	2018-07-25 09:41:00	prolonged protocol	28365	28	36	21.48	0	3	2	0	0	3.84	9.13	66.62	0.63	45	0.88	12	1.28	2075	207.5	0.71	12.1	225	0	10	2250	1	10	9	8	9	2	0.222222	9	5	0.555556	3	1	5	4BB	4	B	B	1	1	1	1	0
2	2017-06-22 10:49:00	prolonged protocol	21879	29	35	20.57	1	5	3	0	0	5.93	4.71	61.2	0.93	22	0.42	20	0.34	2078	138.533	0.5	10.4	150	0	11	1575	1	15	10	10	12	6	0.5	12	9	0.75	7	1	5	4AB	4	A	B	1	1	1	1	0
2	2017-09-14 09:39:00	prolonged protocol	23325	29	29	21.88	0	1	3	1	0	3.97	4.1	24.32	0.48	12	0.21	14	0.75	2080	138.667	1.4	11.4	225	0	10	2475	2	15	14	14	14	8	0.571429	14	9	0.642857	4	1	5	4AB	4	A	B	1	0	2	0	0
2	2018-08-24 09:18:00	prolonged protocol	28896	29	35	20.08	0	1	3	0	0	5.52	6.22	40.97	0.45	46	0.56	17	0.75	2081	148.643	0.4	12.1	225	0	9	1800	1	14	9	8	8	2	0.25	8	5	0.625	4	1	5	5AB	5	A	B	1	1	1	1	0
2	2018-07-03 08:39:00	prolonged protocol	27938	32	28	23.23	1	2	2	0	0	2.61	4.98	60.97	0.63	20	0.19	18	1.17	2083	148.786	1.14	12.6	150	0	11	1838	2	14	10	10	11	6	0.545455	11	6	0.545455	4	1	5	3AB	3	A	B	1	0	2	0	0
2	2018-04-30 08:35:00	prolonged protocol	21902	32	32	23.83	0	2	2	0	0	6.56	8.35	41.82	0.4	24	0.44	19	0.26	2085	173.75	0.64	12	225	0	10	2100	2	12	6	6	7	1	0.142857	7	2	0.285714	1	1	5	4BB	4	B	B	1	1	1	1	0
2	2017-09-25 09:05:00	prolonged protocol	23481	23	28	17.44	1	1	3	0	1	8.34	4.02	44.04	0.42	44	0.46	22	0.43	2096	149.714	0.21	8.8	150	0	13	1800	1	14	7	7	7	5	0.714286	7	5	0.714286	3	1	5	4AB	4	A	B	1	1	1	1	0
2	2016-12-07 09:14:00	prolonged protocol	19047	25	29	25.2	1	1	1	0	0	3.98	6.85	29.26	0.33	12	0.46	11	0.6	2097	116.5	0.5	7	225	0	11	2475	1	18	11	11	12	7	0.583333	12	10	0.833333	7	1	5	4AB	4	A	B	1	0	2	0	0
2	2018-03-21 14:00:00	prolonged protocol	22231	27	29	26.84	1	6	2	0	0	2.6	6.65	28.07	0.36	39	0.21	23	0.71	2102	175.167	0.89	8.7	150	0	8	1200	1	12	11	10	10	1	0.1	10	5	0.5	2	1	5	4AB	4	A	B	1	1	1	1	0
2	2018-08-28 09:48:00	prolonged protocol	28953	26	25	19.92	1	1	1	0	0	3.59	7.19	44.95	0.3	12	0.22	17	0.41	2103	80.8846	0.99	11.6	225	0	11	2550	1	26	17	16	17	10	0.588235	17	9	0.529412	3	1	5	4AB	4	A	B	1	0	2	0	0
2	2017-09-07 09:19:00	prolonged protocol	23193	31	30	23.09	1	1	4	0	0	4.28	6.57	40.73	0.3	12	0.21	25	0.13	2106	123.882	0.23	10.4	150	0	13	1875	1	17	12	12	13	6	0.461538	13	9	0.692308	2	1	5	4AB	4	A	B	1	1	1	1	0
2	2018-04-02 15:04:00	prolonged protocol	26074	28	33	20.44	0	5	3	1	0	1.03	4.49	40.51	0.47	30	0.41	20	0.52	2108	131.75	0.39	11	175	0	16	2675	1	16	7	7	7	5	0.714286	7	5	0.714286	3	1	5	4AB	4	A	B	1	1	1	1	0
2	2018-08-27 15:30:00	prolonged protocol	28946	38	40	17.06	1	1	3	0	0	2.9	8.88	64.73	0.92	35	0.34	8	0.29	2111	211.1	1.27	13	225	0	15	4500	1	10	6	6	7	4	0.571429	7	5	0.714286	2	1	5	4BB	4	B	B	1	1	1	1	0
2	2017-11-27 13:44:00	prolonged protocol	24163	28	30	19.78	0	3	2	0	0	4.93	6.62	37.59	0.39	24	1.06	15	0.41	2112	162.462	1.33	11.3	225	0	12	2850	1	13	13	13	13	8	0.615385	13	8	0.615385	6	1	5	5BB	5	B	B	1	1	1	1	0
2	2018-06-21 10:03:00	prolonged protocol	27676	30	35	25.39	1	5	2	0	1	8.15	6.8	84.69	0.33	30	0.21	37	0.41	2119	141.267	0.54	8	150	0	13	2475	1	15	14	14	14	2	0.142857	14	3	0.214286	1	1	5	4BB	4	B	B	1	1	1	1	0
2	2018-04-11 09:40:00	prolonged protocol	26256	27	27	19.49	0	5	1	1	0	6.45	7.78	52.55	0.25	20	0.31	12	0.34	2119	141.267	1.02	11.6	150	0	16	2850	1	15	9	9	10	7	0.7	10	7	0.7	4	1	5	4AB	4	A	B	1	1	1	1	0
2	2017-12-20 11:25:00	prolonged protocol	24774	37	36	18.31	1	2	3	0	0	4.1	11.21	73.96	0.28	24	0.21	9	0.4	2120	151.429	0.84	8.3	225	0	12	2700	1	14	13	13	14	10	0.714286	14	9	0.642857	4	1	5	4BB	4	B	B	1	1	1	1	0
2	2017-10-24 10:03:00	prolonged protocol	23951	32	36	23.88	1	1	2	0	0	10.49	8.92	51.13	0.1	23	0.48	25	0.19	2121	124.765	0.64	10.8	112.5	0	23	4875	1	17	16	16	17	12	0.705882	17	13	0.764706	5	1	5	4AB	4	A	B	1	1	1	1	0
2	2017-05-19 10:38:00	prolonged protocol	19355	31	33	19.72	0	5	2	0	0	2.19	5.77	60.59	0.42	22	0.23	18	0.37	2128	92.5217	0.51	11.3	150	0	10	1725	1	23	18	18	22	7	0.318182	22	15	0.681818	7	1	5	5BB	5	B	B	1	1	1	1	0
2	2017-05-10 09:34:00	prolonged protocol	21202	29	29	18.36	1	3	1	0	0	7.39	6.22	57.32	0.27	50	0.21	25	0.88	2129	96.7727	0.24	10.1	87.5	0	14	1550	1	22	17	17	17	14	0.823529	17	14	0.823529	10	1	5	4AB	4	A	B	1	0	2	0	0
2	2017-07-14 08:36:00	prolonged protocol	22273	26	28	18.75	0	3	1	0	1	17.67	6.07	78.86	0.76	27	0.66	40	0.27	2131	125.353	0.74	7.3	150	1	13	1500	1	17	12	12	12	7	0.583333	12	5	0.416667	1	1	5	4AB	4	A	B	1	1	1	1	0
2	2018-02-24 14:05:00	prolonged protocol	25444	38	41	19.14	1	3	1	0	0	1.53	6.32	55.87	0.27	27	0.45	8	0.27	2132	266.5	1.04	9.8	300	0	15	5025	1	8	7	7	7	3	0.428571	7	3	0.428571	2	1	5	4BB	4	B	B	1	1	1	1	0
2	2018-05-07 09:22:00	prolonged protocol	22060	35	37	25.95	1	2	2	0	0	1.74	8.07	37.38	0.3	41	0.79	13	0.36	2133	266.625	0.73	15.1	300	0	13	4275	2	8	6	6	6	4	0.666667	6	4	0.666667	4	1	5	4BB	4	B	B	1	1	1	0	0
2	2018-04-26 10:35:00	prolonged protocol	26540	24	27	21.26	1	1	1	0	0	4.92	9	28.97	0.51	15	0.34	8	0.61	2134	194	0.56	9.1	225	0	13	2925	1	11	10	9	9	3	0.333333	9	6	0.666667	4	1	5	4AB	4	A	B	1	0	2	0	0
2	2017-10-17 10:01:00	prolonged protocol	23831	28	34	24.61	1	1	1	0	0	2.65	7.6	53.58	0.31	21	0.42	18	0.6	2135	152.5	0.68	9.5	150	0	9	1350	1	14	11	11	14	2	0.142857	14	10	0.714286	8	1	5	4AB	4	A	B	1	1	1	1	0
2	2017-10-13 09:29:00	prolonged protocol	20014	28	29	20.89	1	4	1	0	0	4.89	6.57	35.62	0.2	12	0.11	32	0.27	2140	178.333	0.58	10.2	112.5	0	11	1200	0	12	7	7	7	7	1	7	5	0.714286	1	1	5	3BB	3	B	B	1	0	2	0	0
2	2017-10-30 15:27:00	prolonged protocol	22937	34	32	19.53	1	1	4	0	0	9.3	9.37	47.94	0.44	17	0.49	15	0.46	2140	267.5	0.97	8.4	225	1	10	2475	1	8	6	6	6	4	0.666667	6	5	0.833333	0	1	5	4BC	4	B	C	1	1	1	1	0
2	2018-03-02 10:24:00	prolonged protocol	25534	37	34	18.37	0	7	3	0	0	3.81	7.34	17.68	0.26	14	0.4	10	0.92	2148	214.8	0.92	11.7	225	0	11	2513	2	10	5	5	5	4	0.8	5	4	0.8	3	1	5	4AB	4	A	B	1	1	1	1	0
2	2017-03-10 14:05:00	prolonged protocol	20134	29	34	19.53	1	3	1	0	0	7.41	9.92	79.28	0.72	40	0.54	15	0.92	2148	126.353	0.74	14.4	150	0	8	1350	1	17	14	13	15	7	0.466667	15	10	0.666667	4	1	5	4AB	4	A	B	1	1	1	1	0
2	2018-10-23 09:56:00	prolonged protocol	29806	28	37	20	0	5	2	0	0	2.13	5.39	56.61	0.38	15	0.21	13	0.42	2152	269	1.12	9.6	225	0	8	1875	2	8	7	7	7	0	0	7	4	0.571429	2	1	5	4AB	4	A	B	2	1	1	1	0
2	2017-06-16 14:49:00	prolonged protocol	21789	34	39	20.58	1	1	1	0	0	2.48	8.86	41.8	0.45	33	0.21	11	0.5	2152	195.636	0.29	11.3	225	0	11	2475	1	11	7	7	10	5	0.5	10	7	0.7	3	1	5	4AB	4	A	B	1	1	1	0	1
2	2018-08-29 13:58:00	prolonged protocol	28984	31	29	22.84	1	4	1	0	0	1.53	6.52	37.1	0.26	20	0.39	19	0.4	2154	215.4	0.55	12.8	187.5	0	11	1988	1	10	9	9	9	7	0.777778	9	4	0.444444	3	1	5	4BA	4	B	A	1	1	1	0	1
2	2018-05-10 15:27:00	prolonged protocol	26830	26	26	20.94	0	3	1	0	0	4.32	5.59	40.57	0.95	14	0.39	24	5.02	2156	179.667	0.57	13.7	100	0	13	1350	1	12	10	10	11	8	0.727273	11	7	0.636364	7	1	5	4AB	4	A	B	1	0	2	0	0
2	2018-03-21 10:08:00	prolonged protocol	25846	35	39	19.14	1	2	3	1	0	5.54	7.23	41.28	0.79	29	0.5	11	1.5	2160	166.154	1.04	10.1	225	0	11	2925	1	13	13	13	13	5	0.384615	13	6	0.461538	3	1	5	4BB	4	B	B	1	1	1	1	0
2	2017-08-11 14:32:00	prolonged protocol	22779	28	29	17.78	1	3	1	0	0	3	5.47	54.2	0.82	20	0.38	12	0.69	2160	127.059	1.58	8.4	225	0	10	2100	1	17	10	10	10	3	0.3	10	5	0.5	1	1	5	4BB	4	B	B	1	1	1	1	0
2	2018-05-11 11:08:00	prolonged protocol	26852	33	33	19.14	1	3	3	0	1	7.01	7.67	42.03	0.58	32	0.53	27	1	2162	240.222	0.35	11.7	112.5	0	13	1425	1	9	3	3	5	1	0.2	5	2	0.4	1	1	5	4BB	4	B	B	1	1	1	1	0
2	2018-08-27 09:55:00	prolonged protocol	28934	31	32	24.13	1	3	1	0	0	3.4	8.77	45.22	0.22	32	0.83	20	0.27	2164	135.25	0.76	10.8	225	0	10	2438	1	16	7	7	7	2	0.285714	7	3	0.428571	1	1	5	4AA	4	A	A	1	1	1	1	0
2	2018-05-29 10:38:00	prolonged protocol	27188	35	34	19.31	1	3	1	0	0	15.15	7.12	81.38	0.46	25	0.54	24	0.43	2165	113.947	0.6	9	200	0	10	2000	2	19	17	17	18	8	0.444444	18	15	0.833333	8	1	5	4AB	4	A	B	1	0	2	0	0
2	2018-07-03 09:37:00	prolonged protocol	27943	37	39	20.83	1	2	1	0	0	4.21	7	77.01	0.89	32	0.35	10	0.37	2166	127.412	1.29	11	300	0	12	3075	1	17	16	16	17	7	0.411765	17	7	0.411765	4	1	5	4BB	4	B	B	1	1	1	1	0
2	2017-12-05 15:20:00	prolonged protocol	24544	29	31	19.84	0	6	2	0	0	2.76	7.77	29.91	0.52	23	0.87	14	0.8	2169	127.588	0.64	12	225	0	11	2400	1	17	16	15	15	13	0.866667	15	10	0.666667	4	1	5	4AA	4	A	A	1	0	2	0	0
2	2018-05-25 09:26:00	prolonged protocol	27116	26	31	20.96	1	2	1	0	0	5.71	8.07	50.91	0.39	15	0.47	16	0.4	2169	86.76	1.2	11.6	187.5	0	11	2475	1	25	19	17	17	10	0.588235	17	10	0.588235	7	1	5	4AB	4	A	B	2	1	1	1	0
2	2018-08-01 09:54:00	prolonged protocol	28501	29	37	24.77	1	1	3	0	0	6.97	12.49	37.74	0.47	29	0.64	5	0.42	2171	180.917	1.07	10.8	225	0	13	3450	1	12	10	10	10	6	0.6	10	5	0.5	1	1	5	4CB	4	C	B	1	0	2	0	0
2	2018-04-26 09:49:00	prolonged protocol	25270	27	28	17.93	1	4	1	0	1	1.48	6.56	29.65	0.16	20	0.32	10	0.15	2192	137	0.42	10.5	100	0	13	1575	2	16	8	8	8	5	0.625	8	5	0.625	3	1	5	4BA	4	B	A	1	1	1	0	1
2	2017-12-15 09:08:00	prolonged protocol	24683	30	26	21.1	0	3	1	0	0	4.96	11.16	39.55	0.27	13	1.09	13	0.33	2192	168.615	0.21	12.1	225	0	14	3750	1	13	12	12	12	3	0.25	12	7	0.583333	2	1	5	4BB	4	B	B	1	1	1	1	0
2	2017-07-13 15:11:00	prolonged protocol	22259	23	25	21.6	0	2	3	0	0	2.1	6.77	50.67	0.57	22	0.3	11	0.87	2192	182.667	0.61	9.5	225	0	11	2475	1	12	8	8	8	6	0.75	8	7	0.875	4	1	5	5AB	5	A	B	1	1	1	1	0
2	2018-05-15 09:37:00	prolonged protocol	26909	30	30	19.53	1	3	3	1	0	0.98	6.81	56.44	0.23	20	0.28	11	0.12	2193	182.75	1.02	11.9	225	0	9	2025	1	12	11	11	11	5	0.454545	11	3	0.272727	2	1	5	4BB	4	B	B	1	1	1	1	0
2	2017-07-07 11:52:00	prolonged protocol	22149	33	34	17.85	1	8	4	0	0	9.71	7.8	99.35	0.25	33	0.63	15	0.43	2193	121.833	0.94	9.2	112.5	0	10	1150	1	18	16	16	17	8	0.470588	15	11	0.733333	1	1	5	3BB	3	B	B	1	1	1	1	0
2	2018-06-25 10:25:00	prolonged protocol	27742	32	32	23.34	1	2	1	0	0	3.97	7.16	55	0.39	32	0.48	11	0.87	2194	156.714	0.49	7.8	225	0	12	2700	0	14	9	9	9	6	0.666667	9	5	0.555556	3	1	5	4AB	4	A	B	1	1	1	0	1
2	2018-08-29 14:23:00	prolonged protocol	28986	29	30	21.72	1	2	1	0	1	0.4	3.4	47.1	0.21	48	0.81	35	0.73	2199	274.875	0.33	9.9	112.5	0	16	1913	1	8	4	4	4	1	0.25	4	3	0.75	0	1	5	4AC	4	A	C	1	1	1	0	1
2	2018-06-29 09:21:00	prolonged protocol	27829	29	28	22.95	0	3	1	0	0	9.7	8.13	29.57	0.65	34	0.46	28	0.96	2202	122.333	0.93	14.8	175	0	9	1750	1	18	11	11	12	4	0.333333	12	6	0.5	2	1	5	5BA	5	B	A	1	1	1	1	0
2	2018-09-28 08:33:00	prolonged protocol	26708	30	30	25.08	0	3	1	0	0	1.67	5.23	32.87	0.52	41	0.6	15	0.68	2205	95.8696	0.77	11.2	225	0	10	2325	0	23	17	17	17	4	0.235294	17	3	0.176471	2	1	5	4BA	4	B	A	1	1	1	1	0
2	2018-06-15 11:23:00	prolonged protocol	27580	35	36	21.23	1	4	2	1	0	2.69	5.62	54.2	0.54	25	0.58	9	0.23	2209	276.125	1.17	18	300	0	16	5550	1	8	5	5	5	2	0.4	5	2	0.4	1	1	5	3BC	3	B	C	1	1	1	1	0
2	2018-02-27 10:04:00	prolonged protocol	24514	28	33	26.84	0	3	2	0	0	5.51	10.5	57.68	0.07	22	0.23	17	0.28	2215	184.583	0.63	14.8	150	0	12	2625	0	12	9	9	9	1	0.111111	9	2	0.222222	0	1	5	3BC	3	B	C	1	1	1	1	0
2	2017-09-27 10:26:00	prolonged protocol	23540	28	33	27.1	0	2	1	0	1	3.62	6.19	42.59	0.55	12	0.3	17	0.57	2216	110.8	0.75	12.2	150	0	11	1800	1	20	16	15	15	9	0.6	15	13	0.866667	4	1	5	4AB	4	A	B	1	0	2	0	0
2	2017-12-05 15:38:00	prolonged protocol	24546	34	31	21.51	0	2	1	0	0	6.32	7.89	39.06	0.3	19	0.79	19	0.37	2217	116.684	0.5	11	200	0	11	2200	1	19	15	14	14	9	0.642857	14	7	0.5	2	1	5	4AB	4	A	B	1	1	1	1	0
2	2018-06-08 08:37:00	prolonged protocol	27396	28	35	29.52	0	3	3	0	1	7.22	9.17	85.59	0.23	37	0.21	31	0.59	2217	221.7	0.75	9.7	112.5	0	11	2025	1	10	3	3	3	1	0.333333	3	1	0.333333	1	1	5	4AB	4	A	B	2	1	1	1	0
2	2018-04-05 08:16:00	prolonged protocol	23772	27	31	19.23	0	3	1	0	0	3.94	5.41	59.89	0.76	35	0.48	15	0.57	2233	148.867	0.43	9.6	150	0	8	1575	1	15	7	6	8	2	0.25	8	1	0.125	0	1	5	4BB	4	B	B	1	1	1	1	0
2	2018-04-24 13:58:00	prolonged protocol	26494	23	27	22.27	0	7	2	0	0	7.41	5.23	44.59	0.64	17	0.52	20	0.54	2237	117.737	0.89	11.6	150	0	11	1575	2	19	14	14	14	10	0.714286	14	6	0.428571	6	1	5	4AB	4	A	B	1	1	1	0	1
2	2018-04-11 09:26:00	prolonged protocol	23667	42	41	19.48	0	14	1	0	0	2.65	7.39	41.7	0.19	26	0.53	8	0.8	2245	204.091	1	9.3	300	0	9	2700	1	11	9	9	10	5	0.5	10	2	0.2	1	1	5	4BB	4	B	B	1	1	1	1	0
2	2018-10-25 10:11:00	prolonged protocol	29828	24	26	23.62	0	4	1	0	0	3.69	7.2	43.38	0.32	40	0.61	30	0.81	2254	125.222	0.24	10	112.5	0	12	1725	1	18	14	12	12	6	0.5	12	10	0.833333	7	1	5	4BA	4	B	A	1	1	1	1	0
2	2018-04-25 15:36:00	prolonged protocol	26151	28	29	22.31	0	1	2	0	0	3.84	6.28	37.86	0.33	25	0.52	14	0.97	2261	226.1	0.97	11	112.5	0	13	2475	1	10	3	3	3	2	0.666667	3	2	0.666667	1	1	5	4BB	4	B	B	1	1	1	1	0
2	2018-09-04 10:29:00	prolonged protocol	13126	32	33	22.83	1	2	1	0	0	4.39	7.67	17.99	0.3	12	0.59	25	0.42	2273	151.533	0.42	10	187.5	0	11	2475	2	15	10	10	10	7	0.7	10	6	0.6	5	1	5	4AB	4	A	B	1	0	2	0	0
2	2016-11-22 16:02:00	prolonged protocol	18812	22	27	17.97	0	3	1	0	0	2.55	4.97	114.36	0.68	45	0.73	19	0.61	2275	142.188	1.35	12	150	0	10	1950	1	16	11	10	12	6	0.5	12	10	0.833333	4	1	5	4AB	4	A	B	1	1	1	1	0
2	2016-12-26 09:17:00	prolonged protocol	19320	30	33	31.6	0	5	3	0	0	1.76	4.97	47.86	0.43	32	0.78	19	0.62	2282	108.667	0.64	15.2	225	0	10	2100	1	21	19	19	19	6	0.315789	17	5	0.294118	1	1	5	4AB	4	A	B	1	1	1	1	0
2	2018-01-09 14:51:00	prolonged protocol	24283	28	30	17.9	0	3	4	0	0	15.33	7.16	44.34	0.28	12	0.46	15	0.36	2282	228.2	0.8	10.7	187.5	0	11	2700	1	10	8	8	8	4	0.5	8	7	0.875	2	1	5	4BB	4	B	B	1	1	1	1	0
2	2018-06-29 09:04:00	prolonged protocol	27845	28	29	21.48	0	5	1	1	0	3.41	6.63	45.63	1.02	16	0.33	16	1.61	2284	228.4	0.93	14.5	200	0	10	2375	1	10	6	6	7	2	0.285714	7	4	0.571429	3	1	5	4BB	4	B	B	1	1	1	1	0
2	2017-09-07 08:37:00	prolonged protocol	23189	29	30	22.66	0	5	3	0	0	7.15	6.89	36.31	0.74	14	0.83	24	0.97	2291	134.765	0.51	10.5	150	0	11	2100	0	17	12	11	11	6	0.545455	11	9	0.818182	5	1	5	5AB	5	A	B	1	1	1	1	0
2	2017-06-15 13:55:00	prolonged protocol	21763	30	30	23.23	0	6	1	0	0	6.99	6.96	75.15	0.68	38	0.46	13	0.61	2300	153.333	0.6	9.4	150	0	11	2175	1	15	13	13	14	7	0.5	14	8	0.571429	4	1	5	4AB	4	A	B	1	1	1	1	0
2	2018-01-04 14:19:00	prolonged protocol	24953	25	22	17.15	0	1	2	0	0	3.73	9.03	49.12	0.79	14	0.22	16	0.5	2308	144.25	0.21	9.1	150	0	12	2025	1	16	12	12	12	5	0.416667	12	8	0.666667	4	1	5	5BB	5	B	B	1	1	1	0	1
2	2018-06-09 12:33:00	prolonged protocol	27420	30	30	23.53	1	3	2	0	1	5.8	3.99	42.94	0.59	22	0.43	46	0.73	2310	115.5	0.56	15	112.5	0	11	1188	1	20	13	10	10	5	0.5	10	9	0.9	4	1	5	4BA	4	B	A	1	1	1	1	0
2	2018-07-17 09:08:00	prolonged protocol	28222	28	29	39.45	0	3	3	0	0	1.76	3.92	46.93	0.35	28	0.29	14	0.39	2312	88.9231	0.75	8.5	250	0	14	3500	1	26	16	16	16	8	0.5	16	6	0.375	5	1	5	4AB	4	A	B	1	1	1	1	0
2	2017-09-28 10:10:00	prolonged protocol	23557	30	31	20.03	0	2	1	1	0	1.53	3.12	74.73	0.28	12	0.81	11	0.45	2312	192.667	0.52	12.3	225	1	12	2550	1	12	9	9	9	1	0.111111	9	7	0.777778	7	1	5	4AB	4	A	B	1	1	1	1	0
2	2017-09-15 11:06:00	prolonged protocol	23357	22	26	21.49	0	3	2	0	0	4.04	7.57	38.72	0.34	26	0.59	19	0.18	2314	128.556	0.57	16	200	0	10	1413	2	18	16	16	16	8	0.5	16	7	0.4375	2	1	5	4BB	4	B	B	1	1	1	1	0
2	2018-05-21 14:26:00	prolonged protocol	21044	29	30	20.03	1	1	1	0	0	2.47	7.23	55.33	0.69	12	0.24	13	0.84	2316	128.667	0.9	12.1	225	0	10	2463	2	18	7	7	7	1	0.142857	7	4	0.571429	2	1	5	4AB	4	A	B	1	1	1	1	0
2	2017-10-21 09:32:00	prolonged protocol	23899	32	32	21.37	0	2	1	0	1	1.96	4.94	18.03	0.32	13	0.92	30	0.68	2317	193.083	1.38	9.9	112.5	0	12	1763	1	12	9	8	8	5	0.625	8	8	1	7	1	5	4BA	4	B	A	1	1	1	1	0
2	2018-06-28 08:21:00	prolonged protocol	27808	38	35	24.39	1	1	2	0	0	3.67	11.2	59.73	0.22	47	0.28	7	0.6	2318	331.143	0.59	12.8	300	0	14	4350	1	7	4	4	4	3	0.75	4	3	0.75	2	1	5	4BB	4	B	B	1	1	1	1	0
2	2016-09-29 09:24:00	prolonged protocol	16019	30	32	19.63	0	5	1	1	0	4.83	7.71	42	0.93	55	0.32	13	0.98	2324	178.769	0.46	9.2	150	0	9	1350	1	13	11	11	11	6	0.545455	11	7	0.636364	4	1	5	4AB	4	A	B	1	1	1	1	0
2	2018-08-10 08:49:00	prolonged protocol	28676	25	26	19.11	1	1	1	0	0	5.75	4.13	54.83	0.25	28	0.64	17	0.7	2324	145.25	0.73	16.7	150	0	10	1500	1	16	13	13	14	5	0.357143	14	7	0.5	4	1	5	4BA	4	B	A	1	1	1	1	0
2	2018-08-03 10:01:00	prolonged protocol	25428	29	31	26.13	1	2	3	0	0	3.39	6.94	37.98	0.15	13	0.27	12	0.07	2326	122.421	0.39	12.3	150	0	13	1950	1	19	14	14	14	9	0.642857	14	5	0.357143	3	1	5	4AB	4	A	B	1	1	1	1	0
2	2018-09-28 09:17:00	prolonged protocol	29440	30	34	20.31	0	1	2	0	0	7.02	5.92	93.63	0.46	14	0.49	14	0.42	2327	258.556	0.49	10.5	225	0	11	2475	1	9	8	8	8	5	0.625	8	4	0.5	4	1	5	4AB	4	A	B	1	1	1	1	0
2	2018-09-04 15:53:00	prolonged protocol	29084	28	31	18.55	0	3	2	0	0	6.37	8.89	18.82	0.14	12	1.03	20	0.21	2334	166.714	1.18	9.1	187.5	0	11	2250	2	14	10	9	9	6	0.666667	9	5	0.555556	2	1	5	4AB	4	A	B	1	1	1	0	1
2	2018-03-02 11:24:00	prolonged protocol	25541	27	28	21.45	0	3	1	0	0	3.45	9.16	33.23	0.64	24	0.57	9	0.85	2335	212.273	0.85	10.4	112.5	1	14	3150	1	11	3	3	3	1	0.333333	3	3	1	2	1	5	4BB	4	B	B	1	1	1	1	0
2	2018-06-01 09:24:00	prolonged protocol	27250	34	41	24.61	1	1	3	0	1	2.94	7.86	65.37	0.32	24	0.47	20	0.6	2338	179.846	0.75	12.6	150	0	12	2475	2	13	11	11	11	2	0.181818	11	3	0.272727	1	1	5	4CB	4	C	B	1	1	1	1	0
2	2017-08-24 09:14:00	prolonged protocol	22977	33	31	27.34	0	4	3	0	1	15.11	9.09	52.81	0.25	28	0.29	20	0.16	2340	130	0.21	11.9	112.5	0	15	2513	1	18	13	13	15	8	0.533333	15	9	0.6	4	1	5	5BB	5	B	B	1	1	1	1	0
2	2018-04-03 10:06:00	prolonged protocol	26092	29	29	20.06	1	1	1	0	0	5.27	6.37	46.71	0.21	34	0.21	17	0.29	2342	156.133	0.21	13.3	150	0	10	1950	1	15	12	12	14	8	0.571429	14	7	0.5	3	1	5	4BB	4	B	B	1	1	1	1	0
2	2017-06-06 09:18:00	prolonged protocol	20882	27	32	20.2	1	3	2	0	0	3.41	7.35	36.7	0.22	21	0.44	14	0.59	2344	111.619	0.69	11.4	150	0	11	2025	1	21	15	14	14	4	0.285714	14	8	0.571429	3	1	5	4AB	4	A	B	1	1	1	1	0
2	2018-05-21 11:06:00	prolonged protocol	27033	28	26	21.48	1	1	1	0	0	3.01	6.57	53.71	0.35	35	0.33	23	0.6	2357	157.133	0.69	11.3	150	0	8	1200	1	15	12	10	11	6	0.545455	11	6	0.545455	4	1	5	4AB	4	A	B	1	1	1	1	0
2	2018-06-05 16:41:00	prolonged protocol	27341	28	31	20.76	0	1	2	0	1	6.94	7.44	12.24	0.97	13	0.38	13	0.45	2360	157.333	0.33	11.5	187.5	1	11	2175	1	15	7	7	7	4	0.571429	7	5	0.714286	2	1	5	4BB	4	B	B	1	1	1	1	0
2	2018-04-16 11:24:00	prolonged protocol	26321	20	22	19.72	0	2	2	0	0	5.27	9.88	70.18	0.35	26	0.38	17	0.59	2362	168.714	0.65	11	150	0	9	1350	2	14	8	7	8	7	0.875	8	6	0.75	4	1	5	4BB	4	B	B	1	1	1	1	0
2	2018-07-17 10:27:00	prolonged protocol	27114	29	33	19.15	0	4	1	0	0	3.79	6.57	47.09	0.17	27	0.39	10	1.79	2362	168.714	0.57	9.8	225	0	12	2625	1	14	11	11	11	8	0.727273	11	5	0.454545	2	1	5	4AB	4	A	B	1	1	1	1	0
2	2018-04-02 15:29:00	prolonged protocol	21695	24	27	18.13	0	3	1	0	1	2.28	6.64	48.48	0.74	29	0.42	19	0.65	2362	236.2	0.56	10.8	100	0	10	975	1	10	7	7	9	2	0.222222	9	3	0.333333	1	1	5	4BB	4	B	B	1	1	1	1	0
2	2017-02-17 14:19:00	prolonged protocol	19751	33	33	22.86	1	1	1	0	0	3.98	7.94	65.53	0.35	18	0.63	11	0.21	2368	64	1.16	11.7	300	0	9	2550	1	37	24	24	27	14	0.518519	27	12	0.444444	7	1	5	4BA	4	B	A	1	1	1	1	0
2	2018-05-30 09:03:00	prolonged protocol	27202	35	34	24.97	1	2	1	0	0	1.46	9.54	45.48	0.19	24	0.21	13	0.17	2369	236.9	0.31	12.4	300	0	12	3525	2	10	7	7	7	5	0.714286	7	7	1	7	1	5	4AB	4	A	B	1	1	1	1	0
2	2017-06-29 09:01:00	prolonged protocol	11886	35	36	20.96	1	4	3	0	0	2.53	5.73	27.91	0.37	22	0.26	18	0.83	2370	98.75	0.66	10.1	225	0	11	2025	1	24	19	19	20	13	0.65	20	13	0.65	7	1	5	4AB	4	A	B	1	1	1	1	0
2	2016-11-15 10:34:00	prolonged protocol	18676	32	34	19.4	1	1	2	0	0	4.82	9.82	33.8	0.62	19	0.55	8	1.7	2372	215.636	0.73	9.7	150	0	12	2250	1	11	9	9	9	3	0.333333	9	6	0.666667	3	1	5	3BB	3	B	B	1	0	2	0	0
2	2018-03-16 15:32:00	prolonged protocol	25768	33	38	22.04	1	1	2	0	0	7.08	6.74	66.77	0.61	15	0.38	23	0.87	2373	169.5	0.66	12.9	150	0	10	1575	1	14	12	11	11	8	0.727273	11	10	0.909091	5	1	5	5BB	5	B	B	1	1	1	1	0
2	2018-05-23 08:39:00	prolonged protocol	25523	31	33	19.76	0	1	1	0	0	5.6	10.51	53.33	0.57	21	0.31	17	1.32	2373	215.727	0.29	15.3	150	0	13	3075	1	11	6	6	6	1	0.166667	6	2	0.333333	0	1	5	4BC	4	B	C	1	1	1	1	0
2	2017-10-13 11:44:00	prolonged protocol	23779	32	34	23.31	1	1	1	0	0	2.56	5.85	28.67	0.33	17	0.31	14	0.28	2374	148.375	1.14	10.1	150	0	12	2588	1	16	11	11	11	10	0.909091	11	9	0.818182	5	1	5	4BB	4	B	B	1	1	1	1	0
2	2018-02-11 09:37:00	prolonged protocol	25362	30	33	16.97	1	3	1	0	0	3.37	6.81	77.99	0.46	19	0.32	11	0.65	2374	158.267	0.68	11	262.5	0	12	3000	1	15	11	11	12	8	0.666667	12	9	0.75	6	1	5	4BB	4	B	B	1	1	1	1	0
2	2017-07-27 14:18:00	prolonged protocol	22552	25	32	27.89	0	2	1	0	1	11.8	5.17	41.79	0.2	16	0.21	25	0.31	2374	182.615	0.22	12.1	150	0	12	2100	1	13	11	11	13	6	0.461538	13	5	0.384615	3	1	5	4BB	4	B	B	1	1	1	1	0
2	2018-08-29 09:58:00	prolonged protocol	28978	26	27	22.58	0	5	3	0	0	4.13	2.78	46.95	0.68	21	0.38	16	1.08	2375	148.438	0.61	10.7	225	0	14	3150	1	16	12	12	13	5	0.384615	13	7	0.538462	4	1	5	4AB	4	A	B	1	1	1	1	0
2	2018-10-22 11:04:00	prolonged protocol	29796	31	33	18.22	1	2	1	0	0	5.67	5.25	64.52	0.49	35	0.58	11	0.52	2376	264	0.44	8.6	300	0	11	3225	1	9	8	7	7	1	0.142857	7	1	0.142857	0	1	5	4BC	4	B	C	1	1	1	1	0
2	2018-05-24 10:01:00	prolonged protocol	27090	37	39	18.99	1	2	1	0	0	1.87	9.16	70.9	0.19	21	0.71	8	0.51	2380	340	0.54	9.2	300	0	13	3750	1	7	3	3	4	3	0.75	4	2	0.5	0	1	5	4AB	4	A	B	1	1	1	1	0
3	2018-06-27 10:16:00	prolonged protocol	27788	30	29	22.46	1	5	2	0	0	2.07	5.64	34.37	0.26	25	0.46	17	0.53	2407	171.929	0.56	9.8	150	0	9	1350	1	14	14	14	14	3	0.214286	14	5	0.357143	4	1	5	4BB	4	B	B	1	1	1	1	0
3	2017-09-29 11:21:00	prolonged protocol	3537	33	34	21.19	1	1	3	0	0	4.54	6.37	41.51	0.17	12	0.21	14	0.79	2407	133.722	0.48	10.6	150	0	11	2100	1	18	11	11	11	2	0.181818	11	6	0.545455	3	1	5	4AA	4	A	A	1	1	1	1	0
3	2018-09-20 09:33:00	prolonged protocol	29320	25	28	21.77	0	3	3	0	1	13.02	8.09	40.99	0.54	15	0.38	22	1.06	2408	120.4	0.81	12	112.5	0	21	3675	1	20	17	17	17	10	0.588235	17	13	0.764706	12	1	5	4AB	4	A	B	1	1	1	1	0
3	2018-05-18 08:25:00	prolonged protocol	26976	30	30	17.75	0	1	1	0	0	6.13	8.85	50.43	0.36	12	0.41	17	0.43	2420	134.444	0.84	10.6	150	0	13	2888	1	18	13	13	13	7	0.538462	13	10	0.769231	8	1	5	5BB	5	B	B	1	1	1	1	0
3	2018-07-30 14:53:00	prolonged protocol	9660	30	35	20.96	1	3	2	0	0	3.78	9.04	26.22	0.46	32	0.43	20	2.08	2422	134.556	0.58	9.4	150	0	10	1725	2	18	16	16	13	3	0.230769	13	4	0.307692	3	1	5	4AB	4	A	B	1	1	1	1	0
3	2018-07-04 11:18:00	prolonged protocol	27977	35	31	20	1	5	3	0	0	2.28	7.1	57.11	0.33	18	0.28	14	0.9	2423	186.385	0.45	9.1	300	0	10	2700	1	13	10	9	10	4	0.4	10	4	0.4	1	1	5	4BB	4	B	B	1	1	1	1	0
3	2018-06-12 10:02:00	prolonged protocol	27460	31	32	17.9	0	9	2	0	1	5.14	5.98	51.34	0.4	21	0.47	27	0.51	2427	303.375	0.59	8.2	100	0	10	1175	1	8	7	7	7	3	0.428571	7	2	0.285714	0	1	5	4CB	4	C	B	1	1	1	1	0
3	2018-09-27 09:47:00	prolonged protocol	29424	26	26	19.14	1	1	3	0	0	5.04	6.52	49.43	0.31	24	0.39	18	0.4	2428	220.727	0.88	14.4	150	0	12	1950	1	11	7	7	7	1	0.142857	7	5	0.714286	4	1	5	4AB	4	A	B	1	1	1	1	0
3	2018-05-21 10:22:00	prolonged protocol	27025	31	33	20.7	0	2	2	0	0	4.1	6.47	47.68	0.67	20	0.21	14	0.38	2428	173.429	0.81	15	225	0	13	3125	1	14	13	13	13	7	0.538462	13	7	0.538462	7	1	5	4BB	4	B	B	1	1	1	1	0
3	2018-04-11 10:51:00	prolonged protocol	26258	27	27	16.65	1	1	1	0	0	9.02	6.37	42.99	0.41	23	0.29	23	1.03	2429	186.846	0.47	10.8	175	0	9	1475	1	13	8	8	8	5	0.625	8	5	0.625	3	1	5	4BB	4	B	B	1	1	1	1	0
3	2017-05-31 09:01:00	prolonged protocol	21524	27	28	20.7	1	2	2	0	0	3.08	5.97	98.63	0.31	39	0.63	15	0.52	2429	127.842	0.69	12.8	150	0	9	1650	1	19	6	6	7	6	0.857143	7	5	0.714286	3	1	5	4AB	4	A	B	1	1	1	1	0
3	2017-08-31 14:08:00	prolonged protocol	23094	33	50	23.8	1	1	1	0	0	4.1	7.75	35.95	0.16	30	0.21	22	0.32	2430	243	0.21	8.8	100	0	15	1775	2	10	9	9	9	7	0.777778	9	7	0.777778	2	1	5	4AB	4	A	B	1	1	1	1	0
3	2018-06-27 10:41:00	prolonged protocol	27792	33	32	31.18	1	3	1	0	0	1.69	7.47	30.34	0.27	22	0.39	19	0.24	2436	174	0.99	13.2	225	0	14	4125	1	14	7	6	6	6	1	6	4	0.666667	2	1	5	3AB	3	A	B	1	1	1	1	0
3	2018-06-15 09:45:00	prolonged protocol	27555	27	35	18.37	1	4	3	0	0	2.8	7.85	42.7	0.51	25	0.62	11	0.27	2437	174.071	0.42	13.1	225	0	10	2700	1	14	12	12	12	5	0.416667	12	10	0.833333	8	1	5	4BB	4	B	B	1	1	1	1	0
3	2018-05-03 08:33:00	prolonged protocol	26663	34	52	17.69	1	1	2	0	0	4.3	11.3	41	0.43	34	1.01	6	0.55	2439	162.6	0.93	7.2	225	0	12	2925	2	15	10	10	12	6	0.5	12	6	0.5	4	1	5	4BB	4	B	B	1	0	2	0	0
3	2018-06-30 10:55:00	prolonged protocol	27889	36	34	21.23	1	1	1	0	0	9.69	8.3	42.22	0.39	21	0.23	18	0.67	2446	152.875	0.61	9	200	1	7	1400	1	16	14	14	14	9	0.642857	14	12	0.857143	2	1	5	5BA	5	B	A	1	1	1	0	1
3	2016-09-12 14:59:00	prolonged protocol	16805	32	35	20.45	1	6	4	0	0	5.07	5.63	44.3	0.43	20	0.26	12	0.79	2451	163.4	0.44	13	100	0	8	800	1	15	11	11	13	7	0.538462	13	8	0.615385	1	1	5	4AA	4	A	A	1	1	1	1	0
3	2018-01-15 10:26:00	prolonged protocol	25107	27	27	17.9	1	2	3	0	0	6.94	6.34	45.13	0.49	30	0.5	17	1.11	2455	245.5	0.87	10	150	0	11	1275	2	10	10	10	10	5	0.5	10	7	0.7	2	1	5	4BB	4	B	B	1	1	1	1	0
3	2017-05-08 09:14:00	prolonged protocol	18131	27	34	19.37	0	2	1	0	0	2.81	12.21	37.38	0.37	36	0.34	9	2.26	2457	189	0.85	7	225	0	9	1875	1	13	9	9	9	8	0.888889	9	8	0.888889	5	1	5	4AB	4	A	B	1	1	1	1	0
3	2017-07-28 11:02:00	prolonged protocol	22561	27	36	23.34	1	3	2	0	0	2.43	6.17	31.84	0.42	12	0.38	27	1.28	2463	136.833	0.64	11.8	112.5	0	11	1538	2	18	14	12	12	5	0.416667	12	6	0.5	3	1	5	3AB	3	A	B	1	1	1	1	0
3	2018-04-17 11:17:00	prolonged protocol	26354	29	33	20.81	0	8	2	0	0	2.01	4.75	71.2	0.66	32	0.43	18	0.95	2464	189.538	0.87	18	200	0	9	1750	2	13	8	8	8	4	0.5	8	4	0.5	3	1	5	4BB	4	B	B	1	0	2	0	0
3	2018-09-07 10:26:00	prolonged protocol	29133	25	30	24.03	1	1	1	0	1	2.89	4.95	36.17	0.35	15	0.32	22	0.42	2465	117.381	0.41	7	150	0	10	1425	1	21	17	17	21	6	0.285714	21	11	0.52381	3	1	5	4BA	4	B	A	1	1	1	0	1
3	2017-11-24 10:27:00	prolonged protocol	24390	29	32	26.04	1	1	1	0	1	3.62	7.92	38.53	0.2	13	0.31	30	0.71	2466	154.125	0.44	12.7	187.5	0	12	2663	1	16	12	12	12	4	0.333333	12	5	0.416667	1	1	5	4BB	4	B	B	1	1	1	0	1
3	2018-07-16 10:00:00	prolonged protocol	28188	32	41	18	1	3	2	0	1	11.78	6.72	36.41	0.67	31	0.22	24	0.83	2468	189.846	0.53	9.5	150	0	13	1725	1	13	11	11	11	2	0.181818	11	10	0.909091	9	1	5	4BB	4	B	B	1	1	1	0	1
3	2018-05-16 09:01:00	prolonged protocol	26926	30	32	19.07	1	2	3	0	0	4.8	6.7	34.93	0.58	17	0.51	15	0.65	2476	275.111	0.85	11	225	0	11	2475	1	9	7	7	7	6	0.857143	7	3	0.428571	1	1	5	4BB	4	B	B	1	1	1	1	0
3	2018-05-04 08:58:00	prolonged protocol	26688	33	35	25.81	1	3	3	0	1	3.48	5.59	37.14	0.29	34	0.22	20	0.36	2487	226.091	0.65	11.8	200	0	10	2000	2	11	9	9	9	2	0.222222	9	6	0.666667	6	1	5	4BB	4	B	B	1	1	1	1	0
3	2017-06-30 10:43:00	prolonged protocol	21197	25	30	19.98	0	3	4	0	0	7.36	4.92	36.79	0.51	29	0.72	40	1.12	2499	131.526	0.86	12.8	100	0	8	775	1	19	11	11	12	5	0.416667	12	10	0.833333	5	1	5	4AA	4	A	A	1	1	1	1	0
3	2018-02-06 16:20:00	prolonged protocol	25346	33	33	19.6	0	4	2	0	0	2.27	5.12	139.36	0.44	20	0.47	10	2.91	2503	208.583	0.82	12.4	187.5	0	12	2700	1	12	9	9	9	4	0.444444	9	3	0.333333	2	1	5	4BB	4	B	B	1	0	2	0	0
3	2017-07-17 09:43:00	prolonged protocol	22323	24	24	17.97	1	3	1	0	0	3.83	6.59	46.11	0.35	18	0.21	23	0.36	2504	125.2	0.52	8.9	150	0	8	1200	1	20	16	16	19	11	0.578947	19	11	0.578947	4	1	5	4AB	4	A	B	1	1	1	1	0
3	2018-08-06 09:03:00	prolonged protocol	28573	28	36	23.44	1	7	2	0	0	2.71	7.24	40.91	0.16	25	0.52	18	4.31	2504	178.857	0.77	8.6	150	0	17	3825	2	14	11	11	11	7	0.636364	11	6	0.545455	3	1	5	4BA	4	B	A	1	1	1	1	0
3	2016-09-18 15:09:00	prolonged protocol	17920	30	33	20.32	0	3	3	0	0	5.64	4.18	47.3	0.31	26	0.58	10	0.89	2508	228	0.32	13.1	87.5	0	13	1475	2	11	11	11	11	9	0.818182	11	5	0.454545	3	1	5	4AB	4	A	B	1	1	1	0	1
3	2018-02-26 08:31:00	prolonged protocol	25449	38	38	21.5	1	1	1	0	0	5.9	9.92	58.57	0.44	20	0.21	8	0.8	2511	251.1	0.68	14.7	300	0	12	3225	2	10	10	10	10	6	0.6	10	3	0.3	1	1	5	3AB	3	A	B	1	1	1	1	0
3	2018-01-04 09:49:00	prolonged protocol	24941	31	30	26.57	0	1	3	0	1	11.59	7.26	28.91	0.2	22	0.44	21	0.57	2519	359.857	0.41	13.1	200	0	11	2300	1	7	5	5	6	1	0.166667	6	3	0.5	1	1	5	4BA	4	B	A	1	1	1	0	1
3	2018-08-01 10:14:00	prolonged protocol	28503	36	42	18.82	1	2	3	0	0	3.9	8.03	51.91	0.22	20	0.22	12	1.36	2520	168	0.91	7.5	300	0	12	3825	1	15	12	11	13	7	0.538462	13	5	0.384615	2	1	5	4AB	4	A	B	1	1	1	1	0
3	2018-10-05 09:26:00	prolonged protocol	29526	28	35	28.38	0	2	2	0	0	3.2	6.05	23.95	0.2	19	0.34	20	0.57	2523	252.3	1.31	18.1	200	0	10	1900	1	10	8	8	8	3	0.375	8	5	0.625	0	1	5	4AC	4	A	C	1	0	2	0	0
3	2017-07-24 15:13:00	prolonged protocol	21036	28	28	22.03	1	2	3	0	0	4.92	7.99	52.59	0.15	30	0.34	13	0.1	2524	132.842	0.52	10	225	0	13	3150	1	19	8	8	9	7	0.777778	9	4	0.444444	1	1	5	4AB	4	A	B	1	1	1	1	0
3	2018-05-21 11:04:00	prolonged protocol	27031	31	35	22.03	1	4	1	0	0	3.01	7.43	28.47	0.91	24	0.25	19	3.33	2532	253.2	0.75	12.7	225	0	11	2850	1	10	15	14	10	3	0.3	10	4	0.4	3	1	5	4AB	4	A	B	1	1	1	1	0
3	2018-05-09 15:31:00	prolonged protocol	26810	30	30	21.37	1	1	3	0	0	5.19	7.47	49.71	0.21	15	0.56	19	0.54	2540	141.111	0.52	9.5	112.5	0	13	2213	2	18	15	15	15	7	0.466667	15	10	0.666667	7	1	5	4BB	4	B	B	2	1	1	1	0
3	2017-06-15 15:22:00	prolonged protocol	21765	38	36	24.69	1	5	3	0	1	2.59	5.9	31.66	0.1	34	0.21	25	0.34	2545	159.062	0.51	10.7	225	0	8	1800	1	16	11	11	12	5	0.416667	12	6	0.5	2	1	5	4AB	4	A	B	1	1	1	1	0
3	2018-03-20 11:16:00	prolonged protocol	9369	32	30	19	0	7	1	1	0	5.01	6.41	58.42	0.41	34	0.31	19	0.65	2550	182.143	1.27	10.5	175	0	8	1600	1	14	12	12	10	4	0.4	10	6	0.6	4	1	5	4BB	4	B	B	1	1	1	1	0
3	2017-04-14 13:57:00	prolonged protocol	20764	29	32	23.44	0	8	1	0	0	2.64	2.6	26.79	0.29	38	0.27	22	0.54	2555	127.75	0.33	8.9	150	0	8	1087	2	20	12	12	13	10	0.769231	13	7	0.538462	2	1	5	4AA	4	A	A	1	1	1	1	0
3	2017-09-11 11:20:00	prolonged protocol	23280	29	28	22.86	1	1	1	0	0	4.91	6.02	42.9	0.21	12	0.31	19	0.53	2557	142.056	0.42	11.2	150	0	12	2100	2	18	10	10	11	4	0.363636	11	8	0.727273	3	1	5	4AA	4	A	A	1	1	1	1	0
3	2018-08-15 14:33:00	prolonged protocol	28763	39	42	24.39	1	7	3	0	0	4.94	6.62	53.62	0.41	26	0.62	19	0.55	2559	159.938	0.86	10.8	187.5	0	10	2213	1	16	14	14	14	4	0.285714	14	6	0.428571	4	1	5	4AB	4	A	B	1	1	1	1	0
3	2017-11-06 10:05:00	prolonged protocol	24120	35	36	19.53	1	4	3	0	0	6.48	8.97	82.18	0.27	37	0.7	16	1.08	2561	213.417	0.77	11.4	225	0	15	3600	1	12	10	10	10	5	0.5	10	7	0.7	4	1	5	4AB	4	A	B	1	1	1	1	0
3	2018-09-03 10:55:00	prolonged protocol	29041	29	30	21.63	0	1	1	0	0	2.94	5.96	76.75	0.3	20	0.53	8	0.68	2564	213.667	0.96	14.2	262.5	0	16	4500	1	12	5	5	5	3	0.6	5	3	0.6	0	1	5	4AC	4	A	C	1	1	1	1	0
3	2017-09-27 14:08:00	prolonged protocol	23549	29	37	20.83	0	1	3	0	0	3.54	8.61	47.81	0.2	26	0.46	22	0.34	2567	160.438	0.37	14	112.5	0	16	2588	2	16	9	9	9	5	0.555556	9	3	0.333333	0	1	5	3BB	3	B	B	1	1	1	1	0
3	2018-05-04 11:33:00	prolonged protocol	26710	31	33	24.65	0	6	3	0	1	2.78	7.79	37.25	0.16	32	0.66	9	0.17	2567	135.105	0.32	12	150	0	13	1950	0	19	9	9	9	5	0.555556	9	2	0.222222	2	1	5	4BB	4	B	B	1	1	1	1	0
3	2018-05-21 09:00:00	prolonged protocol	27013	36	41	22.03	1	4	3	0	0	6.51	8.66	49.96	0.91	24	0.25	19	3.33	2572	257.2	1.35	12.7	225	0	11	2850	1	10	10	10	10	3	0.3	10	4	0.4	2	1	5	4BB	4	B	B	1	1	1	1	0
3	2017-12-06 08:23:00	prolonged protocol	24550	27	28	22.35	1	1	1	0	1	10.72	9.81	20.5	1.07	22	0.56	35	2.29	2576	161	0.72	10.7	112.5	0	13	1838	1	16	11	10	12	4	0.333333	12	4	0.333333	2	1	5	4BB	4	B	B	1	1	1	1	0
3	2017-09-30 09:56:00	prolonged protocol	23593	30	31	23.42	1	2	1	0	0	3.32	4.68	26.93	0.51	22	0.78	21	0.99	2577	257.7	1.01	11	200	1	11	2350	1	10	5	5	8	4	0.5	8	5	0.625	4	1	5	4AB	4	A	B	1	1	1	1	0
3	2018-03-27 15:06:00	prolonged protocol	25950	29	29	20.55	0	4	2	0	0	3.3	6.9	33	0.61	20	1.1	23	0.62	2578	257.8	0.87	12.8	187.5	0	11	2700	1	10	8	8	8	4	0.5	8	6	0.75	4	1	5	4BB	4	B	B	1	1	1	1	0
3	2018-08-03 08:13:00	prolonged protocol	27082	34	35	24.39	1	2	3	0	1	2.35	5.09	55	0.21	40	0.24	22	0.41	2581	161.312	0.63	10.5	225	0	9	1800	2	16	14	14	15	10	0.666667	15	9	0.6	2	1	5	4BC	4	B	C	1	1	1	1	0
3	2018-08-10 11:10:00	prolonged protocol	28688	30	32	20.66	0	2	2	0	0	8.6	11.06	45.87	0.5	31	0.29	23	0.8	2582	234.727	0.57	12	150	0	13	1575	1	11	11	11	11	3	0.272727	11	9	0.818182	7	1	5	5BB	5	B	B	1	1	1	1	0
3	2018-08-27 11:22:00	prolonged protocol	28944	36	39	16.63	1	1	1	0	0	2.67	9.2	59.92	0.19	28	1.34	14	0.4	2594	172.933	1.06	10.4	225	0	14	3525	1	15	11	11	11	5	0.454545	11	4	0.363636	1	1	5	4BC	4	B	C	1	1	1	1	1
3	2018-04-24 09:03:00	prolonged protocol	26473	33	35	20.55	0	6	3	0	0	3.06	9.45	53.8	0.26	24	0.3	7	0.49	2595	370.714	0.46	11.3	300	0	13	3825	1	7	5	5	6	3	0.5	6	5	0.833333	3	1	5	4BB	4	B	B	2	1	1	1	0
3	2018-08-10 10:48:00	prolonged protocol	28686	31	35	26.71	1	4	3	0	0	3.43	7.54	39.93	0.29	28	0.66	7	0.69	2610	217.5	0.87	12.7	262.5	1	10	2850	1	12	6	6	9	3	0.333333	9	3	0.333333	1	1	5	4BB	4	B	B	1	1	1	1	0
3	2017-11-10 08:08:00	prolonged protocol	23463	29	30	21.37	0	4	4	0	1	3.95	6.09	35.01	0.23	12	0.57	21	0.24	2612	153.647	0.25	12.6	112.5	0	14	2475	1	17	13	13	17	9	0.529412	17	10	0.588235	7	1	5	4AB	4	A	B	1	1	1	1	0
3	2018-01-20 10:56:00	prolonged protocol	25198	35	34	18.31	0	2	1	0	0	6.03	10.29	33.81	0.28	20	0.45	11	1.95	2618	238	1.12	14.7	225	0	12	2850	1	11	7	7	8	6	0.75	8	5	0.625	3	1	5	4AB	4	A	B	1	1	1	1	0
3	2018-09-26 10:25:00	prolonged protocol	29402	30	32	17.75	0	4	1	0	0	3.82	6.32	34.1	0.36	27	0.46	12	0.31	2619	145.5	0.85	12.3	300	0	11	3300	1	18	16	16	16	6	0.375	16	9	0.5625	4	1	5	4AB	4	A	B	1	1	1	1	0
3	2017-07-26 09:42:00	prolonged protocol	22500	28	30	20.83	1	2	3	0	0	2.52	6.26	56.27	0.39	50	0.7	9	1	2619	187.071	1.36	12.9	225	0	8	1800	1	14	11	11	12	9	0.75	12	10	0.833333	7	1	5	4AB	4	A	B	1	1	1	1	0
3	2018-08-13 11:07:00	prolonged protocol	26854	23	30	17.51	0	2	2	1	0	6.4	6.06	57.21	0.25	30	0.53	17	1.24	2622	262.2	0.42	11.7	150	0	9	1350	2	10	8	8	8	2	0.25	8	5	0.625	1	1	5	4BB	4	B	B	1	1	1	1	0
3	2017-12-20 10:36:00	prolonged protocol	24771	30	33	22.78	1	1	3	0	0	4.76	5.93	24.81	0.61	14	0.27	17	1.99	2623	201.769	0.92	9	225	0	10	1725	1	13	7	7	7	2	0.285714	7	5	0.714286	3	1	5	4AB	4	A	B	1	1	1	1	0
3	2017-09-22 16:06:00	prolonged protocol	23478	29	34	24.22	1	4	3	0	0	2.45	5.48	18.83	0.48	29	0.99	21	0.86	2630	175.333	1.2	12.1	150	0	10	1500	1	15	11	11	12	7	0.583333	12	8	0.666667	5	1	5	4BB	4	B	B	1	1	1	1	0
3	2018-07-11 08:31:00	prolonged protocol	28114	33	34	20.76	1	1	1	0	1	3.35	6.55	53.17	0.23	34	0.42	40	1.73	2631	202.385	0.73	10	112.5	0	11	1425	1	13	10	10	10	9	0.9	10	9	0.9	9	1	5	4BA	4	B	A	1	1	1	1	0
3	2017-08-25 13:57:00	prolonged protocol	23028	30	30	20.7	0	5	1	0	0	7.43	6.33	37.88	0.22	37	0.63	17	0.36	2634	219.5	0.59	11.2	225	0	11	3000	1	12	9	9	10	6	0.6	10	5	0.5	2	1	5	4BB	4	B	B	1	1	1	1	0
3	2017-03-20 08:42:00	prolonged protocol	20292	30	29	20.94	0	2	3	1	0	1.54	6.46	46.11	0.66	22	0.29	8	0.27	2635	119.773	0.47	10.8	225	0	10	2250	1	22	16	15	15	7	0.466667	15	4	0.266667	3	1	5	4AB	4	A	B	1	1	1	1	0
3	2018-04-27 10:29:00	prolonged protocol	26557	27	28	21.72	1	4	2	0	0	4.94	7.68	50.42	0.51	25	0.49	13	0.51	2637	239.727	1.18	10	187.5	0	11	2138	1	11	7	7	7	4	0.571429	7	7	1	6	1	5	5BB	5	B	B	1	1	1	1	0
3	2017-04-03 10:18:00	prolonged protocol	20553	27	45	21.37	1	2	2	0	0	3.61	5.52	67.41	0.37	39	0.55	19	0.07	2643	146.833	0.68	13	100	0	11	1050	0	18	17	17	17	10	0.588235	17	11	0.647059	10	1	5	4AA	4	A	A	1	1	1	1	0
3	2018-07-28 11:42:00	prolonged protocol	28431	30	39	27.06	1	1	1	0	0	2.42	9.8	52.95	0.07	21	0.7	14	0.42	2656	177.067	1.04	14	225	0	13	3675	1	15	12	12	12	4	0.333333	12	7	0.583333	2	1	5	4BB	4	B	B	1	1	1	1	0
3	2018-03-27 17:01:00	prolonged protocol	25954	32	41	25.81	1	2	1	0	0	2.19	7.16	55.33	0.42	42	0.36	27	0.45	2657	139.842	1.41	9.5	150	0	10	1425	2	19	6	6	7	2	0.285714	7	2	0.285714	1	1	5	4BB	4	B	B	1	1	1	1	0
3	2018-08-13 10:24:00	prolonged protocol	27012	28	30	30.82	1	1	1	0	0	9.02	8.46	41.73	0.25	28	0.52	28	0.41	2665	156.765	0.54	14.1	150	0	16	3488	1	17	15	15	17	8	0.470588	17	7	0.411765	3	1	5	4AB	4	A	B	1	1	1	1	0
3	2018-06-20 09:27:00	prolonged protocol	27648	31	30	22.21	0	3	1	0	0	1.78	4.41	38.27	0.4	38	0.69	21	0.37	2665	242.273	0.59	13.6	150	0	8	1050	1	11	5	5	5	2	0.4	5	4	0.8	2	1	5	4BB	4	B	B	1	1	1	1	0
3	2017-03-01 14:09:00	prolonged protocol	19958	29	31	19.56	0	3	3	0	0	6.28	5.7	110.74	0.48	15	0.29	12	0.43	2666	121.182	0.72	14.1	225	1	11	2700	1	22	20	20	21	10	0.47619	21	14	0.666667	11	1	5	4AB	4	A	B	1	0	2	0	0
3	2018-09-12 11:34:00	prolonged protocol	29199	35	42	17.78	0	6	2	0	0	3.69	7.79	58.75	0.37	15	0.36	15	0.38	2675	167.188	0.93	9.2	200	1	12	2538	1	16	9	9	10	5	0.5	10	3	0.3	1	1	5	4BB	4	B	B	1	1	1	1	0
3	2018-08-01 13:41:00	prolonged protocol	28515	21	36	20	1	2	2	0	0	4.04	4.5	43.29	0.48	25	0.47	24	0.99	2680	121.818	0.75	10.5	100	0	12	1250	1	22	11	10	12	4	0.333333	12	4	0.333333	2	1	5	4BB	4	B	B	1	1	1	1	0
3	2017-10-23 09:45:00	prolonged protocol	23914	39	38	22.66	1	1	1	0	0	2.36	7.23	104.93	0.45	46	0.44	7	0.7	2682	447	0.68	9	225	0	11	2775	1	6	6	6	6	6	1	6	1	0.166667	1	1	5	4AB	4	A	B	1	1	1	1	0
3	2017-09-26 11:40:00	prolonged protocol	23524	28	29	24.17	1	1	1	0	0	3.08	8.59	56.61	0.34	21	0.24	14	0.66	2684	206.462	0.61	15	225	0	11	2850	1	13	9	9	10	2	0.2	10	5	0.5	3	1	5	4AB	4	A	B	1	1	1	1	1
3	2018-05-19 10:17:00	prolonged protocol	26998	27	29	19.81	0	2	1	0	0	7.87	6.14	39.36	0.74	14	0.56	25	0.86	2685	149.167	0.7	10.9	187.5	0	9	1725	1	18	7	7	7	1	0.142857	7	3	0.428571	1	1	5	4CB	4	C	B	1	1	1	1	0
3	2018-03-07 15:06:00	prolonged protocol	25621	27	27	23.34	0	3	3	0	0	3.69	8.52	35.58	0.33	17	0.67	16	1.07	2692	192.286	0.54	14	150	0	8	1200	2	14	13	13	13	11	0.846154	13	9	0.692308	8	1	5	4AB	4	A	B	1	1	1	1	0
3	2016-10-04 11:36:00	prolonged protocol	18143	28	31	16.94	1	1	1	0	0	3.07	5.68	34.9	0.74	29	0.63	20	0.71	2695	168.438	0.9	8.7	225	0	10	2250	1	16	9	9	10	5	0.5	8	3	0.375	0	1	5	3BA	3	B	A	1	1	1	1	0
3	2018-06-08 09:25:00	prolonged protocol	25842	28	33	20.96	0	4	2	0	0	4.71	7.16	32.41	0.62	18	0.35	17	1.14	2699	245.364	0.68	10.2	200	0	14	3325	1	11	9	9	9	6	0.666667	9	6	0.666667	5	1	5	4BB	4	B	B	1	1	1	1	0
3	2017-07-24 11:16:00	prolonged protocol	22452	30	32	25.15	1	1	3	0	0	5.05	7.16	46.18	0.54	29	0.67	15	0.56	2700	150	0.61	10.7	225	0	9	1950	1	18	14	14	16	9	0.5625	16	11	0.6875	7	1	5	4AB	4	A	B	1	1	1	1	0
3	2018-08-20 14:05:00	prolonged protocol	28851	30	38	20.58	1	2	1	0	1	2.75	12.02	31.19	0.39	27	0.48	18	0.32	2700	142.105	0.36	13.4	150	0	14	2700	1	19	9	9	10	5	0.5	10	5	0.5	2	1	5	4BA	4	B	A	2	1	1	1	0
3	2018-07-31 09:30:00	prolonged protocol	26990	26	31	19.98	0	3	3	0	0	6.12	9.9	24.94	0.42	31	0.74	18	0.43	2701	245.545	1.29	9.9	112.5	0	11	1725	1	11	8	7	7	1	0.142857	7	6	0.857143	4	1	5	4BB	4	B	B	1	1	1	1	0
3	2017-11-13 11:34:00	prolonged protocol	23821	27	29	20.57	1	1	1	0	0	14.18	8.85	61.32	0.92	35	0.82	19	1.73	2703	112.625	1.21	7.7	187.5	0	9	1875	1	24	19	19	20	12	0.6	20	13	0.65	4	1	5	4BA	4	B	A	1	1	1	1	0
3	2018-05-24 09:51:00	prolonged protocol	27088	30	30	20.32	1	3	1	0	0	4.34	7.58	37.62	0.26	31	0.32	19	1.76	2707	246.091	0.81	10.1	225	0	12	2700	1	11	8	8	8	5	0.625	8	6	0.75	6	1	5	4BB	4	B	B	1	1	1	1	0
3	2018-03-09 09:41:00	prolonged protocol	18218	37	41	25.2	1	3	1	0	1	19.38	5.39	60	0.43	36	0.21	21	0.66	2711	271.1	0.39	11.4	150	0	12	2025	1	10	7	6	6	2	0.333333	6	1	0.166667	1	1	5	4BB	4	B	B	1	1	1	1	0
3	2018-05-05 12:27:00	prolonged protocol	26735	30	29	21.83	0	2	1	0	0	8.49	5.81	93.69	0.35	22	0.72	18	0.45	2720	194.286	0.79	11.9	225	0	12	2700	1	14	10	9	9	7	0.777778	9	8	0.888889	5	1	5	4BB	4	B	B	1	1	1	1	0
3	2017-07-21 10:58:00	prolonged protocol	8077	30	31	22.43	1	4	2	0	0	1.94	7.27	47.25	0.7	14	0.21	11	0.73	2724	123.818	0.77	9	150	0	10	1425	2	22	17	17	20	5	0.25	20	4	0.2	2	1	5	4AB	4	A	B	1	1	1	0	1
3	2018-03-05 09:01:00	prolonged protocol	25561	26	28	18.75	0	7	3	0	0	1.93	5.12	40.82	0.44	14	0.35	17	1.45	2731	227.583	1.02	9.6	150	0	10	1313	1	12	9	9	10	5	0.5	10	9	0.9	4	1	5	5AB	5	A	B	1	1	1	1	0
3	2018-01-08 08:46:00	prolonged protocol	24990	28	33	24.65	0	4	3	0	0	2.62	6.15	42.92	0.23	23	0.64	14	0.5	2734	143.895	0.76	13.3	200	0	10	1900	1	19	13	13	13	5	0.384615	13	6	0.461538	2	1	5	4BB	4	B	B	1	1	1	1	0
3	2018-02-02 15:27:00	prolonged protocol	24951	31	30	23.24	0	5	2	0	1	5.36	6.49	37.69	0.2	18	0.41	21	0.29	2734	455.667	1.22	12.5	200	0	11	2275	1	6	4	4	5	3	0.6	5	1	0.2	0	1	5	3BB	3	B	B	1	1	1	1	0
3	2018-04-23 08:41:00	prolonged protocol	26447	30	34	27.22	0	3	3	0	0	3.78	5.65	37.77	0.75	30	0.58	20	1.09	2740	161.176	0.89	12.5	300	0	9	2400	1	17	7	7	8	6	0.75	8	4	0.5	4	1	5	4BB	4	B	B	1	1	1	1	0
3	2017-11-22 13:48:00	prolonged protocol	24365	32	38	26.13	1	7	2	0	0	4.35	3.89	48.36	0.46	20	0.37	16	0.9	2745	161.471	0.55	13.3	225	0	10	2200	2	17	8	7	7	4	0.571429	7	3	0.428571	3	1	5	4BA	4	B	A	1	1	1	1	0
3	2018-05-03 14:20:00	prolonged protocol	24061	30	33	23.44	0	5	1	0	0	4.13	6.73	45.77	0.82	23	0.56	19	0.88	2746	144.526	0.68	8.8	150	0	11	1800	2	19	18	18	18	2	0.111111	18	7	0.388889	3	1	5	4AB	4	A	B	1	1	1	1	0
3	2017-03-29 08:25:00	prolonged protocol	20466	39	30	27.82	1	4	3	0	0	1.87	8.05	44.56	0.38	34	0.33	15	0.34	2747	109.88	0.28	10.8	225	0	13	2925	1	25	15	14	14	11	0.785714	14	7	0.5	5	1	5	4AB	4	A	B	1	1	1	1	0
3	2018-05-31 09:16:00	prolonged protocol	21998	28	27	23.73	0	2	2	0	1	12.48	8.13	61.81	0.2	23	0.21	43	0.18	2747	274.7	0.33	10.7	112.5	0	12	1388	1	10	10	8	8	2	0.25	8	3	0.375	1	1	5	4BB	4	B	B	1	1	1	1	0
3	2018-09-27 08:46:00	prolonged protocol	29420	34	34	21.78	0	3	1	0	0	3.92	7.42	49.84	0.23	20	0.83	12	0.51	2747	305.222	0.46	10.5	225	0	12	2550	1	9	7	7	8	2	0.25	8	5	0.625	1	1	5	4BB	4	B	B	1	1	1	1	0
3	2017-12-18 11:32:00	prolonged protocol	24730	27	30	21.51	0	3	1	0	0	9.93	6.06	50.56	0.51	17	0.26	17	0.63	2749	249.909	0.61	10.7	200	0	8	1600	1	11	9	9	11	0	0	11	9	0.818182	2	1	5	4BB	4	B	B	2	1	1	0	1
3	2018-09-05 09:25:00	prolonged protocol	29091	34	39	21.76	1	1	1	0	0	3.84	4.93	38.59	0.16	22	0.56	23	0.24	2753	183.533	0.79	12.7	150	0	11	1575	1	15	15	15	15	5	0.333333	15	9	0.6	4	1	5	4AB	4	A	B	1	1	1	1	0
3	2018-04-27 15:55:00	prolonged protocol	26569	32	32	23.14	1	3	1	0	1	10.29	7.82	33.47	0.62	42	0.41	21	0.56	2758	212.154	0.34	8	150	0	10	1238	1	13	6	6	8	2	0.25	8	4	0.5	3	1	5	4BB	4	B	B	1	1	1	1	0
3	2018-03-20 14:34:00	prolonged protocol	25830	30	31	19.43	1	1	1	0	0	5.89	7.81	38.61	0.52	18	0.66	24	0.77	2760	230	1.04	8.8	225	0	13	3375	1	12	9	9	10	4	0.4	10	9	0.9	5	1	5	4BB	4	B	B	1	1	1	1	0
3	2018-09-21 10:07:00	prolonged protocol	29338	30	35	23.34	1	3	2	0	0	5.42	6.49	33.66	0.36	23	0.35	22	1.27	2762	120.087	0.86	14.9	150	0	11	2250	1	23	21	21	23	8	0.347826	23	7	0.304348	6	1	5	4AB	4	A	B	1	1	1	1	0
3	2017-10-30 09:06:00	prolonged protocol	24019	22	22	27.18	0	4	1	0	0	10.44	9.76	37.42	0.39	31	1.01	28	0.71	2764	251.273	0.93	8.1	150	0	17	2850	1	11	10	10	10	6	0.6	10	7	0.7	3	1	5	4BB	4	B	B	1	1	1	0	1
3	2017-10-31 10:56:00	prolonged protocol	24052	26	29	21.23	0	3	1	0	0	5.32	6.59	40.39	0.48	16	0.57	11	1.14	2765	276.5	0.82	15.1	225	0	13	3188	1	10	8	8	8	5	0.625	8	3	0.375	1	1	5	4AB	4	A	B	1	1	1	1	0
3	2017-09-29 10:33:00	prolonged protocol	23580	31	33	26.28	1	6	2	0	1	13.43	5.16	51.01	0.79	34	0.21	28	1.73	2768	153.778	0.53	10.2	150	0	8	1050	1	18	15	15	15	13	0.866667	15	13	0.866667	10	1	5	4BB	4	B	B	1	0	2	0	0
3	2018-04-17 09:59:00	prolonged protocol	26340	28	27	20.7	0	2	1	0	0	4.28	7.96	39.65	0.97	26	0.52	13	2.53	2769	213	0.55	11	225	0	11	2475	1	13	9	9	10	3	0.3	10	3	0.3	1	1	5	4BB	4	B	B	1	1	1	1	0
3	2018-03-23 13:56:00	prolonged protocol	25881	30	31	24.03	0	3	1	0	0	4.31	6.65	46.4	0.56	14	0.56	18	0.62	2774	154.111	0.81	11	150	0	12	2175	1	18	10	10	11	3	0.272727	11	4	0.363636	3	1	5	4AB	4	A	B	1	1	1	1	0
3	2016-11-22 16:19:00	prolonged protocol	18810	35	30	24.89	0	5	2	0	0	6.77	7.38	41.96	0.55	26	1.3	15	0.34	2777	115.708	0.95	15.2	225	0	11	1988	1	24	20	20	20	13	0.65	18	17	0.944444	9	1	5	4AB	4	A	B	1	1	1	1	0
3	2017-11-07 14:29:00	prolonged protocol	24165	26	27	22.58	1	2	4	0	0	3.89	9.01	45.33	0.39	31	0.44	18	0.98	2780	252.727	0.73	11.6	100	0	12	1625	1	11	7	7	7	3	0.428571	7	4	0.571429	4	1	5	4AB	4	A	B	1	1	1	1	0
3	2018-06-18 10:33:00	prolonged protocol	17928	35	36	19.53	1	4	1	1	0	3.12	7.56	47.44	0.36	49	0.53	10	1.49	2780	185.333	1.27	12.6	300	0	11	3900	1	15	11	11	13	6	0.461538	13	5	0.384615	4	1	5	6BB	6	B	B	1	1	1	1	0
3	2016-09-21 13:45:00	prolonged protocol	17986	30	32	21.64	0	5	3	0	1	8.43	3.8	49.6	0.76	12	0.64	8	1.2	2792	310.222	0.61	11.3	112.5	0	11	1350	0	9	5	5	7	4	0.571429	5	1	0.2	0	1	5	4BC	4	B	C	1	1	1	1	0
3	2018-08-27 10:17:00	prolonged protocol	28938	37	35	20.31	1	2	3	0	0	10.58	5.17	63.39	0.37	29	1.01	13	2.77	2796	349.5	1.05	10.9	300	0	13	3900	1	8	5	4	5	2	0.4	5	4	0.8	4	1	5	4BB	4	B	B	1	1	1	1	0
3	2017-01-17 14:54:00	prolonged protocol	19519	24	32	19.47	1	1	1	0	0	4.06	6.54	47.35	0.48	19	0.37	16	0.93	2797	139.85	0.77	14	150	0	13	1725	1	20	15	13	13	9	0.692308	11	6	0.545455	2	1	5	4AB	4	A	B	1	1	1	1	0
3	2017-07-20 10:02:00	prolonged protocol	22393	30	33	18.44	1	3	2	0	1	7.72	5.18	49.94	0.63	26	0.36	27	0.77	2800	121.739	0.7	10.6	100	0	9	900	1	23	20	20	20	7	0.35	20	6	0.3	1	1	5	4BB	4	B	B	1	1	1	1	0
3	2018-08-20 16:09:00	prolonged protocol	28855	33	29	22.03	1	3	1	0	0	7.93	9.55	51.23	0.53	33	0.54	22	0.72	2800	215.385	0.47	11.5	150	0	12	2025	1	13	11	11	11	4	0.363636	11	9	0.818182	4	1	5	4AB	4	A	B	1	1	1	1	0
3	2018-01-10 14:01:00	prolonged protocol	25034	36	37	21.48	1	1	1	0	0	8.71	9.04	55.78	0.19	30	0.28	9	0.43	2802	233.5	0.83	8.4	300	0	14	4200	1	12	7	7	7	4	0.571429	7	3	0.428571	2	1	5	4AB	4	A	B	1	1	2	0	0
3	2018-08-18 11:11:00	prolonged protocol	28823	28	33	19.47	0	3	3	0	0	3.64	4.01	55	0.46	27	0.45	17	0.92	2804	155.778	0.98	11.2	225	0	11	2325	2	18	16	16	16	8	0.5	16	7	0.4375	1	1	5	4BB	4	B	B	1	1	1	1	0
3	2017-05-31 11:16:00	prolonged protocol	21536	32	34	20.83	1	3	1	0	0	2.15	6.07	39.02	0.44	16	0.92	15	0.42	2805	96.7241	1.47	14.5	225	0	8	1725	1	29	21	21	23	11	0.478261	23	10	0.434783	5	1	5	4AB	4	A	B	1	1	1	1	0
3	2017-04-28 10:01:00	prolonged protocol	21026	24	27	20.7	0	4	3	0	0	2.07	9.03	34.12	0.12	25	0.24	12	0.76	2806	187.067	1.02	12	150	0	10	1950	1	15	15	15	15	9	0.6	15	11	0.733333	9	1	5	4AA	4	A	A	1	1	1	1	0
3	2017-05-16 09:04:00	prolonged protocol	21289	24	31	25.54	0	4	3	0	1	14.03	5.7	45.56	0.44	37	0.23	28	0.53	2808	127.636	0.41	9.8	112.5	0	15	2400	1	22	10	10	11	3	0.272727	11	6	0.545455	2	1	5	4AA	4	A	A	1	0	2	0	0
3	2018-05-15 10:34:00	prolonged protocol	26913	26	28	18.13	0	2	1	0	0	6.78	6.91	36.9	0.82	12	0.26	21	1.07	2809	147.842	1.17	11.7	150	0	11	1575	1	19	13	13	13	8	0.615385	13	6	0.461538	5	1	5	4BB	4	B	B	1	1	1	1	0
3	2018-09-18 15:19:00	prolonged protocol	22717	30	34	24.69	1	1	1	0	0	2.97	5.32	51.71	1.07	37	0.35	22	1.48	2812	255.636	0.71	10.2	150	0	11	1650	1	11	9	9	10	4	0.4	10	4	0.4	3	1	5	4BB	4	B	B	1	1	1	1	0
3	2018-09-28 09:35:00	prolonged protocol	29442	25	26	17.63	1	3	1	0	0	1.56	8.38	37.61	0.36	15	0.62	16	0.96	2813	187.533	0.62	12.1	200	0	10	2000	1	15	9	8	9	8	0.888889	9	7	0.777778	6	1	5	4AB	4	A	B	1	1	1	1	0
3	2018-05-28 10:35:00	prolonged protocol	27160	26	28	19.95	1	1	1	0	0	6.44	5.32	45.62	0.55	28	0.65	15	0.92	2815	187.667	0.67	10.7	150	0	12	2400	1	15	9	9	10	4	0.4	10	3	0.3	1	1	5	4BC	4	B	C	1	1	1	1	0
3	2017-09-08 15:32:00	prolonged protocol	23254	25	28	18.59	0	7	1	0	0	4.03	6.55	43.01	0.15	14	0.25	13	0.22	2819	313.222	0.35	12.4	187.5	0	11	1625	0	9	7	7	7	6	0.857143	7	5	0.714286	3	1	5	4BB	4	B	B	1	1	1	1	0
3	2018-05-09 09:17:00	prolonged protocol	24419	34	36	23.44	1	3	2	0	0	5.34	7.52	73.28	0.6	13	0.62	15	0.35	2824	166.118	1.27	8.5	225	0	11	2700	0	17	10	10	10	3	0.3	10	3	0.3	1	1	5	4AB	4	A	B	2	1	1	1	0
3	2018-05-15 10:01:00	prolonged protocol	26408	23	29	20.7	0	6	3	0	0	6.55	6.46	43.33	0.51	30	0.53	21	0.75	2827	353.375	1.13	13.2	187.5	0	11	2363	2	8	7	7	7	3	0.428571	7	5	0.714286	5	1	5	4BB	4	B	B	2	1	1	1	0
3	2018-03-05 10:25:00	prolonged protocol	25569	20	33	20.31	0	1	2	0	0	3.6	8.51	43.76	0.53	21	0.63	11	0.25	2829	134.714	0.96	12.5	187.5	0	12	2100	1	21	8	8	9	6	0.666667	9	6	0.666667	3	1	5	4AA	4	A	A	1	1	1	1	0
3	2016-12-09 14:12:00	prolonged protocol	16846	30	29	30.04	1	2	1	0	1	18.1	5.33	75.07	0.69	50	0.91	24	0.78	2832	157.333	0.7	10.2	150	0	8	1200	1	18	12	12	12	7	0.583333	10	3	0.3	2	1	5	4AB	4	A	B	1	1	1	1	0
3	2017-12-13 14:26:00	prolonged protocol	24664	28	33	23.44	1	1	1	0	1	6.47	8.91	44.29	0.24	29	0.52	29	0.33	2833	257.545	1.38	11.6	150	0	11	1650	1	11	9	9	9	4	0.444444	9	5	0.555556	3	1	5	4BA	4	B	A	1	1	1	1	0
3	2018-06-15 08:14:00	prolonged protocol	26460	24	29	19.23	0	1	3	0	0	4.86	6.73	53	0.57	23	0.56	16	1.3	2837	315.222	0.58	10.5	150	0	11	1875	1	9	4	4	4	1	0.25	4	2	0.5	0	1	5	4CB	4	C	B	2	1	1	1	0
3	2018-05-08 10:46:00	prolonged protocol	26775	26	33	24.78	0	6	1	0	0	6.5	5.91	45.57	0.27	35	0.4	23	0.8	2842	149.579	0.31	15.7	150	0	8	1200	1	19	10	8	8	2	0.25	8	7	0.875	3	1	5	4BB	4	B	B	1	1	1	1	0
3	2018-08-27 09:31:00	prolonged protocol	15812	34	36	27.47	1	12	2	0	0	10.27	4.85	50.2	0.28	26	0.4	16	0.34	2843	135.381	0.8	8.3	262.5	0	11	3150	1	21	11	10	11	6	0.545455	11	5	0.454545	3	1	5	4BB	4	B	B	1	1	1	1	0
3	2017-02-20 11:35:00	prolonged protocol	19785	32	34	16.65	1	7	2	0	0	2.71	7.59	66.05	0.18	22	0.26	18	0.64	2852	167.765	0.73	10	150	0	11	1650	1	17	10	10	11	6	0.545455	11	8	0.727273	3	1	5	4AA	4	A	A	1	1	1	1	0
3	2017-11-06 14:27:00	prolonged protocol	24135	34	40	19.11	0	4	2	0	0	6.18	6.69	81.67	0.27	12	0.48	16	0.55	2854	167.882	1.45	11.6	225	0	11	2700	1	17	12	12	14	11	0.785714	14	9	0.642857	3	1	5	4BB	4	B	B	1	1	1	1	0
3	2018-10-12 09:25:00	prolonged protocol	29631	29	35	20.7	1	1	1	0	0	3.7	4.6	32.5	0.36	21	0.35	13	0.22	2857	219.769	1.05	7.3	225	0	10	2175	1	13	10	10	10	4	0.4	10	6	0.6	3	1	5	4BB	4	B	B	1	1	1	1	0
3	2017-08-31 08:23:00	prolonged protocol	23083	27	28	16.65	1	5	3	0	0	6.18	7.25	41.35	0.39	23	0.32	24	0.25	2865	150.789	0.48	12.3	150	0	13	1950	1	19	17	15	16	3	0.1875	16	11	0.6875	2	1	5	4BB	4	B	B	1	1	1	0	1
3	2017-07-07 11:25:00	prolonged protocol	22148	26	30	22.86	0	3	1	0	0	4.19	7.9	32.26	0.38	14	0.49	19	0.79	2869	159.389	0.73	10	150	0	10	1613	1	18	13	13	13	6	0.461538	13	8	0.615385	5	1	5	4AA	4	A	A	1	1	1	1	0
3	2018-08-18 12:36:00	prolonged protocol	28829	27	31	19.31	0	1	2	0	0	10.68	7.42	45.34	0.56	30	0.53	23	0.53	2871	114.84	0.88	10.9	212.5	0	8	1813	2	25	15	15	15	4	0.266667	15	5	0.333333	1	1	5	4BC	4	B	C	1	1	1	1	0
3	2017-06-20 15:48:00	prolonged protocol	21850	32	37	22.64	1	10	3	0	0	1.89	4.4	39.48	0.36	22	0.31	27	0.65	2876	169.176	1	14.3	150	1	9	1650	2	17	11	11	11	5	0.454545	11	7	0.636364	4	1	5	4BB	4	B	B	1	0	2	0	0
3	2018-02-06 15:41:00	prolonged protocol	25344	30	36	19.53	1	4	1	0	0	6.79	8.95	47.73	0.24	36	0.4	13	0.3	2878	479.667	0.71	12.2	187.5	0	12	2363	1	6	5	5	5	2	0.4	5	1	0.2	1	1	5	4AB	4	A	B	1	1	1	1	0
3	2017-12-07 13:43:00	prolonged protocol	22441	35	35	17.47	1	1	1	1	0	4.23	8.53	59.6	0.16	27	0.33	13	1.15	2882	411.714	0.57	9.7	300	1	11	2400	2	7	6	5	5	3	0.6	5	1	0.2	0	1	5	3BB	3	B	B	1	0	2	0	0
3	2017-04-11 11:28:00	prolonged protocol	20702	29	31	24.44	0	3	3	0	1	11.29	8.03	67.31	0.49	45	1.03	16	0.3	2890	144.5	1.39	13.5	150	0	9	1350	1	20	10	10	11	7	0.636364	11	3	0.272727	0	1	5	3AB	3	A	B	1	1	1	1	0
3	2017-10-24 09:49:00	prolonged protocol	23947	36	36	25.08	0	14	3	0	0	3.42	7.7	26.53	0.33	22	0.37	13	0.28	2893	131.5	0.86	13.3	225	0	11	2475	2	22	17	17	18	7	0.388889	18	9	0.5	5	1	5	4AB	4	A	B	1	1	1	1	0
3	2018-06-05 14:02:00	prolonged protocol	27335	32	30	17.51	0	3	1	0	0	7.91	6.56	68.25	0.46	12	0.56	23	0.97	2898	115.92	1.26	10.1	112.5	1	11	1613	1	25	24	22	22	13	0.590909	22	6	0.272727	6	1	5	4AB	4	A	B	1	1	1	1	0
3	2016-12-01 11:44:00	prolonged protocol	18964	28	30	24.77	1	1	3	0	0	2.73	8.64	29.81	0.12	16	1.01	14	0.18	2898	144.9	1.1	9.5	225	0	11	2625	1	20	18	18	18	13	0.722222	16	9	0.5625	8	1	5	4AA	4	A	A	1	1	1	1	0
3	2017-03-27 09:54:00	prolonged protocol	20424	34	34	23.15	1	2	4	0	0	1.06	5.46	40.48	0.82	23	0.49	10	1.34	2900	181.25	0.39	12.2	225	0	10	2250	1	16	13	13	13	11	0.846154	13	11	0.846154	7	1	5	4AB	4	A	B	1	1	1	0	1
3	2017-07-14 08:51:00	prolonged protocol	22274	38	41	20.03	0	7	3	0	0	3.01	7.13	26.84	0.48	18	0.23	18	0.42	2906	161.444	1.1	8.5	150	0	11	2100	1	18	14	13	13	6	0.461538	13	7	0.538462	2	1	5	4AB	4	A	B	1	1	1	1	0
3	2017-12-15 09:11:00	prolonged protocol	21714	27	30	18.49	1	4	2	0	0	7.05	6.52	29.23	0.32	19	0.52	18	1.01	2907	290.7	0.93	8.8	150	0	10	1275	1	10	7	7	7	5	0.714286	7	7	1	3	1	5	4BB	4	B	B	1	1	1	1	0
3	2017-10-12 09:38:00	prolonged protocol	23746	32	34	23.42	1	3	3	0	1	7.59	5.27	51.25	0.6	43	0.58	25	0.99	2908	181.75	0.89	12.7	112.5	0	6	675	2	16	10	10	10	4	0.4	10	3	0.3	0	1	5	3BB	3	B	B	1	1	1	1	0
3	2016-10-24 10:23:00	prolonged protocol	17943	26	29	21.5	1	2	4	0	0	5.38	7.65	29.6	0.47	25	0.67	10	0.67	2910	223.846	0.57	8.2	112.5	0	14	1725	1	13	11	11	11	4	0.363636	11	5	0.454545	1	1	5	4AB	4	A	B	1	0	2	0	0
3	2018-06-13 09:03:00	prolonged protocol	27499	30	31	21.61	1	2	1	0	0	2.84	7.22	24.62	0.34	20	0.42	25	0.28	2911	171.235	0.52	11.6	112.5	0	14	1625	1	17	14	14	14	10	0.714286	14	11	0.785714	5	1	5	4AB	4	A	B	1	1	1	1	0
3	2017-11-10 15:23:00	prolonged protocol	24212	26	26	27.02	0	3	1	0	0	7.14	7.09	39.34	0.09	19	0.27	23	0.16	2913	161.833	0.21	13.2	150	0	13	2888	1	18	16	15	15	10	0.666667	15	11	0.733333	10	1	5	4AB	4	A	B	1	1	1	1	0
3	2018-05-29 08:28:00	prolonged protocol	27178	29	29	21.79	0	3	1	0	0	3.59	6.14	58.8	0.58	22	0.43	15	0.25	2917	162.056	0.59	12.3	225	0	12	2625	1	18	13	13	14	5	0.357143	14	2	0.142857	1	1	5	4AC	4	A	C	1	1	1	1	0
3	2017-06-28 10:50:00	prolonged protocol	21979	35	39	16.8	1	7	3	0	0	12.58	13.95	39.42	0.19	29	0.33	13	1.02	2919	171.706	0.71	11.2	225	0	12	1875	1	17	14	14	14	9	0.642857	14	9	0.642857	4	1	5	4AA	4	A	A	1	1	1	1	0
3	2018-05-16 10:15:00	prolonged protocol	26934	35	35	18.75	1	4	1	0	0	4.83	7.39	105.54	0.2	12	0.36	11	0.98	2920	292	0.58	7.8	225	0	16	3450	1	10	8	7	7	4	0.571429	7	3	0.428571	2	1	5	4AB	4	A	B	1	1	1	1	0
3	2017-12-20 14:18:00	prolonged protocol	24775	25	28	18.9	1	4	3	0	1	7	7.75	40.87	0.55	32	0.89	30	0.95	2920	146	0.85	7.1	100	0	12	1263	1	20	20	20	20	11	0.55	20	14	0.7	7	1	5	4AB	4	A	B	1	1	1	1	0
3	2018-05-09 09:56:00	prolonged protocol	26794	31	32	20.81	0	3	3	0	0	8.54	7.34	56.78	0.25	14	0.26	15	0.24	2920	162.222	0.43	11	225	0	12	3450	1	18	11	10	10	6	0.6	10	3	0.3	1	1	5	4BB	4	B	B	1	1	1	1	0
3	2018-07-09 14:47:00	prolonged protocol	28074	31	31	22.43	1	1	1	0	0	3.65	6.82	61.14	0.46	34	0.42	21	0.62	2922	208.714	0.75	12	150	0	11	2175	1	14	11	11	11	4	0.363636	11	3	0.272727	1	1	5	4BC	4	B	C	1	1	1	1	0
3	2018-10-12 09:13:00	prolonged protocol	29630	34	35	20.83	1	2	1	0	1	8.09	6.05	50.29	0.56	21	0.38	22	0.84	2922	132.818	0.48	8.7	112.5	0	11	1275	1	22	21	20	20	10	0.5	20	11	0.55	3	1	5	4BA	4	B	A	1	1	1	1	0
3	2018-04-23 13:58:00	prolonged protocol	26465	29	35	20.44	0	8	1	0	0	4.29	7	53.43	0.16	21	0.92	15	0.63	2926	195.067	0.64	12	112.5	0	11	1613	1	15	11	11	11	3	0.272727	11	6	0.545455	3	1	5	4BB	4	B	B	1	1	1	1	0
3	2018-06-08 09:11:00	prolonged protocol	27400	30	30	23.28	1	3	1	0	0	4.42	6.36	43.01	0.35	27	0.41	15	0.31	2927	209.071	1.14	13.5	225	0	12	3075	1	14	9	9	10	4	0.4	10	7	0.7	2	1	5	4BB	4	B	B	1	1	1	1	0
3	2018-08-06 09:56:00	prolonged protocol	28577	32	27	24.44	1	1	1	0	0	5.84	5.69	57	0.74	23	0.34	17	0.14	2931	139.571	0.74	8.1	112.5	0	9	1200	1	21	17	16	17	5	0.294118	17	5	0.294118	1	1	5	4BA	4	B	A	1	1	1	1	0
3	2018-04-02 08:14:00	prolonged protocol	26041	31	32	17.4	1	8	3	1	0	9.37	4.1	37.82	0.43	36	0.39	12	1.08	2934	146.7	1.11	11.9	300	1	10	3000	1	20	12	12	14	8	0.571429	14	6	0.428571	5	1	5	4BB	4	B	B	1	1	1	0	1
3	2017-07-17 14:05:00	prolonged protocol	22335	32	31	28.84	0	6	1	0	0	5.17	6.41	37.07	0.29	26	0.3	27	0.43	2947	140.333	0.84	10.2	225	0	10	2100	1	21	20	18	19	14	0.736842	19	16	0.842105	11	1	5	5BB	5	B	B	1	1	1	1	0
3	2018-10-16 09:29:00	prolonged protocol	29703	28	31	19.63	0	2	2	0	1	11.05	9.27	32.7	0.72	12	0.5	13	0.93	2949	327.667	0.69	13.8	187.5	1	7	1388	2	9	7	7	7	3	0.428571	7	3	0.428571	1	1	5	4AB	4	A	B	1	1	1	1	0
3	2018-06-08 10:37:00	prolonged protocol	27408	33	42	19.49	1	1	2	0	1	4.53	7.93	52.07	0.48	13	0.21	28	0.72	2951	147.55	0.55	7.4	112.5	0	12	2138	0	20	13	13	15	7	0.466667	15	8	0.533333	6	1	5	4BB	4	B	B	1	1	1	0	1
3	2018-07-07 10:51:00	prolonged protocol	28042	33	36	22.77	1	2	1	0	0	2.11	5.08	37.07	0.43	25	0.71	40	0.66	2953	95.2581	0.92	8	100	0	9	900	1	31	30	30	30	15	0.5	30	13	0.433333	7	1	5	4AB	4	A	B	1	0	2	0	0
3	2017-07-26 11:19:00	prolonged protocol	18489	28	28	22.31	0	4	1	0	0	6.69	7.02	54.98	0.27	31	0.54	12	0.26	2955	140.714	0.61	13	225	0	12	2325	1	21	16	16	16	12	0.75	16	13	0.8125	6	1	5	4AA	4	A	A	1	1	1	1	0
3	2018-08-08 14:04:00	prolonged protocol	28658	30	31	19.11	1	1	2	0	0	2.67	9.64	90.6	0.25	55	0.55	14	0.77	2964	228	0.81	7.1	225	0	11	2625	1	13	9	9	10	6	0.6	10	4	0.4	3	1	5	4AB	4	A	B	1	1	1	0	1
3	2018-07-18 14:14:00	prolonged protocol	28262	28	26	19.29	1	1	1	0	1	4.23	5.8	34.34	0.26	25	0.43	35	0.55	2967	141.286	0.52	11	100	0	12	1363	1	21	16	16	16	6	0.375	16	7	0.4375	2	1	5	4BA	4	B	A	1	1	1	1	0
3	2018-08-09 15:42:00	prolonged protocol	28674	31	33	22.12	0	3	1	0	0	22.41	10.35	44.62	0.66	25	0.62	17	0.47	2972	156.421	0.54	16.6	225	0	9	2025	1	19	13	13	14	5	0.357143	14	5	0.357143	4	1	5	4BB	4	B	B	1	1	1	1	1
3	2018-06-28 14:31:00	prolonged protocol	27835	26	27	20.32	0	6	3	0	0	3.68	6.14	40.69	0.57	12	0.24	7	0.79	2973	228.692	0.74	11.3	300	0	12	3450	1	13	9	8	9	6	0.666667	9	5	0.555556	4	1	5	4AB	4	A	B	1	1	1	1	0
3	2018-10-05 11:02:00	prolonged protocol	29539	33	34	22.31	1	1	1	0	0	1.08	3.2	11.93	1.08	12	0.24	14	1.37	2973	228.692	0.88	7.3	300	0	11	3000	1	13	9	9	10	5	0.5	10	4	0.4	2	1	5	4BA	4	B	A	1	1	1	1	0
3	2018-03-14 09:28:00	prolonged protocol	25725	29	30	24.01	0	3	3	0	1	4.78	5.13	43.49	0.43	19	0.49	26	0.08	2978	156.737	0.77	10.4	100	0	15	1925	2	19	16	16	17	5	0.294118	17	9	0.529412	1	1	5	4BB	4	B	B	1	1	1	1	0
3	2018-07-06 11:05:00	prolonged protocol	28014	26	26	19.78	0	4	3	0	0	6.23	8.19	38.22	0.58	21	0.39	23	0.6	2981	212.929	0.58	8.4	150	0	13	1950	2	14	6	5	5	2	0.4	5	2	0.4	1	1	5	4BA	4	B	A	1	1	1	1	0
3	2018-07-20 11:09:00	prolonged protocol	24529	22	28	19.1	1	3	2	0	0	3.58	7.21	50.31	0.37	15	0.27	22	0.59	2983	229.462	0.68	13.8	150	0	10	2400	2	13	11	11	11	0	0	11	1	0.0909091	0	1	5	4CB	4	C	B	2	1	1	0	1
3	2018-01-30 15:48:00	prolonged protocol	25301	26	27	18.03	0	3	1	0	1	6.19	4.37	73	0.39	15	0.25	20	0.16	2985	142.143	0.57	7.5	150	1	12	1650	1	21	12	10	10	2	0.2	10	4	0.4	3	1	5	4AB	4	A	B	1	1	1	1	0
3	2017-11-28 14:05:00	prolonged protocol	24449	36	36	18.49	1	1	2	0	0	5.34	9.9	53.19	1.01	12	0.42	14	1.35	2998	149.9	0.57	8.4	225	0	11	2363	2	20	15	15	16	4	0.25	16	7	0.4375	2	1	5	4BB	4	B	B	1	1	1	1	0
3	2017-09-20 09:18:00	prolonged protocol	23422	32	32	20.83	0	2	2	0	0	10.51	7.5	27.42	0.32	12	0.066	20	1.34	3000	157.895	0.99	9.5	262.5	0	8	2100	1	19	15	14	15	10	0.666667	15	5	0.333333	2	1	5	4AB	4	A	B	1	0	2	0	0
3	2018-06-08 08:32:00	prolonged protocol	21968	38	38	19.15	1	3	3	0	0	3.79	8.89	66.94	0.24	27	0.96	10	0.6	3017	603.4	0.26	8.8	300	0	14	4125	2	5	4	4	4	3	0.75	4	3	0.75	1	1	5	4BA	4	B	A	1	1	1	1	0
3	2017-07-12 10:54:00	prolonged protocol	22228	35	38	22.31	1	1	2	0	0	4.73	8.47	55.37	0.19	33	0.41	19	0.28	3018	158.842	0.69	6.4	225	0	13	2925	1	19	14	13	16	7	0.4375	16	11	0.6875	7	1	5	5AB	5	A	B	1	1	1	1	0
3	2018-08-17 11:16:00	prolonged protocol	28804	29	34	18.49	0	4	1	0	0	5.06	7.15	49.7	0.74	28	0.43	18	1.37	3018	158.842	0.89	11.6	225	0	8	1688	1	19	10	10	11	3	0.272727	11	2	0.181818	0	1	5	4BC	4	B	C	1	1	1	1	0
3	2017-08-21 16:00:00	prolonged protocol	22938	23	26	22.64	0	2	2	0	0	2.34	6.31	70.96	0.49	22	0.58	15	0.6	3021	167.833	0.6	10.5	150	0	11	1575	2	18	10	10	10	9	0.9	10	9	0.9	4	1	5	4AB	4	A	B	1	1	1	1	0
3	2017-12-12 13:50:00	prolonged protocol	24644	28	32	18.83	1	1	2	0	0	3.58	6.9	56.26	0.28	18	0.26	12	1.65	3027	275.182	1.55	6.4	225	0	12	2700	1	11	8	8	8	2	0.25	8	1	0.125	0	1	5	3BC	3	B	C	1	1	1	1	0
3	2016-09-27 09:35:00	prolonged protocol	18069	27	27	20.7	1	1	1	0	0	4.16	4.98	34.4	0.4	23	0.22	27	0.52	3028	116.462	0.34	7.8	150	0	11	1575	1	26	21	19	22	8	0.363636	20	8	0.4	5	1	5	4AA	4	A	A	1	1	1	1	0
3	2018-06-07 09:05:00	prolonged protocol	27377	31	34	24.14	1	10	2	0	0	2.84	6.01	37.92	0.33	16	0.54	27	0.52	3028	232.923	0.66	13.6	112.5	0	11	1238	1	13	10	10	10	2	0.2	10	3	0.3	2	1	5	4BA	4	B	A	1	1	1	1	0
4	2018-06-13 11:08:00	prolonged protocol	27511	34	30	21.1	0	1	1	0	0	5.78	6.3	42.06	0.57	21	0.35	12	0.39	3036	159.789	0.78	13.8	225	0	10	2363	1	19	17	17	17	12	0.705882	17	12	0.705882	10	1	5	4AB	4	A	B	1	0	2	0	0
4	2018-08-08 10:30:00	prolonged protocol	28648	37	41	19.6	0	3	1	0	0	7.12	10.1	42.27	0.89	12	0.35	14	0.99	3038	276.182	0.93	14.9	262.5	0	15	4013	2	11	8	8	8	5	0.625	8	3	0.375	2	1	5	4BA	4	B	A	1	1	1	1	0
4	2018-06-21 15:57:00	prolonged protocol	27694	32	36	29.22	0	1	2	0	1	6.55	5.37	45.6	0.49	28	0.38	22	0.21	3041	233.923	0.34	10.5	225	0	11	2325	1	13	12	12	12	8	0.666667	12	8	0.666667	5	1	5	4AB	4	A	B	1	1	1	1	0
4	2018-02-27 11:04:00	prolonged protocol	24617	25	33	21.77	1	4	1	0	0	5.2	7.48	28.54	0.4	25	0.93	19	0.72	3047	217.643	0.51	13.1	150	1	10	1500	1	14	12	12	10	3	0.3	10	6	0.6	3	1	5	4AB	4	A	B	1	1	1	1	0
4	2017-07-28 10:09:00	prolonged protocol	20634	33	36	23.92	1	2	1	0	0	5.46	9.97	58.8	0.39	19	0.35	15	0.97	3057	191.062	0.91	8.9	150	0	11	2325	1	16	14	13	13	7	0.538462	13	5	0.384615	2	1	5	3AB	3	A	B	1	1	1	1	0
4	2017-08-23 13:45:00	prolonged protocol	22579	32	27	20.96	0	2	3	0	0	3.31	7.37	57.06	0.38	30	0.4	10	0.54	3060	191.25	0.95	9.6	187.5	0	11	2438	1	16	13	13	14	5	0.357143	14	5	0.357143	1	1	5	4AB	4	A	B	1	1	1	0	1
4	2017-03-31 10:41:00	prolonged protocol	20533	31	43	21.37	1	6	1	0	0	3.71	6.65	41.35	0.88	23	0.67	16	1.41	3062	191.375	1.2	12.8	150	0	10	1725	1	16	14	14	14	11	0.785714	14	11	0.785714	7	1	5	4AA	4	A	A	1	1	1	1	0
4	2017-10-16 08:27:00	prolonged protocol	23794	27	30	23.31	0	1	3	0	1	16.14	7.08	69.86	0.32	19	0.21	30	0.26	3064	235.692	0.51	13.1	150	0	21	3000	2	13	9	9	9	4	0.444444	9	4	0.444444	1	1	5	4BB	4	B	B	1	1	1	1	0
4	2017-11-28 15:26:00	prolonged protocol	22151	30	31	17.48	1	2	4	0	0	5.69	7.22	43.78	0.4	16	0.71	7	0.7	3072	438.857	1.66	8	300	0	10	3000	1	7	7	7	7	4	0.571429	7	5	0.714286	1	1	5	4BB	4	B	B	1	1	1	1	0
4	2017-08-21 11:43:00	prolonged protocol	22928	29	32	17.97	0	2	2	0	0	4.87	8.57	71	0.32	12	0.53	18	0.92	3074	341.556	0.32	9	150	1	11	1650	1	9	8	8	9	6	0.666667	9	6	0.666667	4	1	5	4AA	4	A	A	1	1	1	1	0
4	2017-12-11 14:11:00	prolonged protocol	24601	34	35	21.23	0	1	3	1	0	2.45	6.13	82.39	0.29	24	0.1	9	1.18	3076	256.333	0.26	14.5	300	1	13	3375	1	12	10	10	11	4	0.363636	11	7	0.636364	4	1	5	4BB	4	B	B	1	1	1	1	0
4	2017-04-06 10:12:00	prolonged protocol	20620	27	35	27.47	0	3	2	0	0	2.15	4.5	44.06	0.27	25	0.64	22	0.52	3079	171.056	0.66	17.4	150	0	11	1425	2	18	9	8	8	6	0.75	8	3	0.375	3	1	5	4AB	4	A	B	1	1	1	1	0
4	2018-06-11 08:45:00	prolonged protocol	27426	26	28	19.29	0	7	1	0	0	6.02	8.59	54.7	0.91	19	0.7	12	1.56	3087	205.8	0.41	11.3	200	0	11	2000	1	15	14	14	14	5	0.357143	14	7	0.5	1	1	5	4BB	4	B	B	1	1	1	1	0
4	2016-11-14 14:10:00	prolonged protocol	18656	30	30	20.9	0	1	2	0	0	1.85	5.69	28.5	0.26	21	0.58	18	0.37	3089	154.45	1.77	10.5	150	0	12	2775	2	20	13	13	13	4	0.307692	13	5	0.384615	2	1	5	4BB	4	B	B	1	1	1	0	1
4	2017-10-14 10:34:00	prolonged protocol	23788	34	39	22.03	1	6	3	0	1	9.99	4.37	29.02	0.42	29	0.21	23	0.51	3096	154.8	0.69	10.4	150	0	8	1200	0	20	9	5	6	3	0.5	6	5	0.833333	1	1	5	4AB	4	A	B	1	1	1	1	0
4	2018-07-13 10:08:00	prolonged protocol	28156	36	37	21.34	1	3	1	0	0	6.34	5.87	54.45	0.59	12	0.32	21	0.36	3097	193.562	0.69	8.3	150	0	10	1500	1	16	13	12	12	5	0.416667	12	6	0.5	3	1	5	4BB	4	B	B	1	1	1	0	1
4	2018-07-16 08:56:00	prolonged protocol	28183	32	36	23.53	0	6	2	0	0	11.29	3.06	31.11	0.27	12	0.49	11	0.76	3102	387.75	0.91	10	225	1	10	2250	1	8	6	6	6	0	0	6	2	0.333333	1	1	5	4AB	4	A	B	2	1	1	1	0
4	2017-09-21 08:56:00	prolonged protocol	22641	31	31	19.81	0	2	3	0	0	4.05	7.15	61.01	0.53	12	0.32	16	0.72	3106	163.474	0.67	8.3	225	0	9	2025	1	19	13	13	13	7	0.538462	13	7	0.538462	3	1	5	4AB	4	A	B	1	1	1	1	0
4	2018-08-14 13:42:00	prolonged protocol	28737	31	35	21.63	1	1	1	0	0	3.15	6.13	44.47	0.73	47	0.33	25	1.05	3138	120.692	0.55	11.9	100	0	9	900	2	26	17	17	20	15	0.75	20	7	0.35	4	1	5	4BA	4	B	A	1	1	1	1	0
4	2018-08-16 08:21:00	prolonged protocol	25417	30	30	19.1	1	4	4	0	0	4.14	7.09	61.96	0.55	29	0.28	17	0.57	3145	209.667	1.21	9	225	0	13	2925	1	15	5	5	5	3	0.6	5	3	0.6	2	1	5	4BB	4	B	B	1	1	1	1	0
4	2018-06-15 11:03:00	prolonged protocol	27575	25	27	21.67	0	4	2	0	0	3.78	6.78	46.33	0.49	24	0.6	20	0.99	3149	174.944	1.09	13	225	0	12	2625	2	18	10	10	11	8	0.727273	11	6	0.545455	3	1	5	4AB	4	A	B	1	1	1	1	0
4	2017-11-06 09:52:00	prolonged protocol	24117	33	36	17.91	1	1	2	0	1	5.6	7.57	40.18	0.39	12	0.21	26	0.08	3150	185.294	0.6	9.9	150	0	16	1650	2	17	15	15	15	14	0.933333	15	13	0.866667	6	1	5	4AB	4	A	B	1	1	1	1	0
4	2018-08-07 08:39:00	prolonged protocol	25550	27	29	18.59	0	5	2	0	0	12.16	11.01	66.74	0.47	24	0.46	24	1.44	3154	225.286	0.77	10.4	225	0	13	3900	1	14	8	7	8	6	0.75	8	6	0.75	2	1	5	4BB	4	B	B	1	1	1	1	0
4	2018-07-23 10:48:00	prolonged protocol	28324	33	48	24.03	1	4	1	0	0	6.09	8.9	66.86	0.51	20	0.25	14	0.75	3165	166.579	0.66	10.5	225	0	11	2850	1	19	13	13	16	5	0.3125	16	7	0.4375	4	1	5	5BB	5	B	B	1	1	1	1	0
4	2018-02-01 13:49:00	prolonged protocol	25094	28	28	19.05	1	5	2	0	0	5.39	8.42	24.42	0.25	20	0.46	16	0.66	3182	138.348	1.86	10.2	187.5	0	9	1950	1	23	18	18	18	4	0.222222	18	10	0.555556	7	1	5	4AB	4	A	B	1	1	1	1	0
4	2018-05-03 10:48:00	prolonged protocol	26672	26	39	20.17	0	2	3	0	0	5.51	7.04	47.4	0.62	22	0.45	25	0.68	3191	290.091	0.6	10.2	112.5	0	13	1575	1	11	9	9	10	7	0.7	10	8	0.8	5	1	5	4AB	4	A	B	1	1	1	1	0
4	2018-05-05 08:38:00	prolonged protocol	26721	29	33	18.73	1	1	1	0	0	5.17	7.03	63.1	0.96	41	0.73	14	2.07	3194	245.692	1.01	13.1	225	0	9	2025	1	13	12	12	12	3	0.25	12	6	0.5	4	1	5	4BB	4	B	B	1	1	1	1	0
4	2017-11-02 10:04:00	prolonged protocol	24071	29	33	21.48	1	3	1	0	1	4.43	7.55	40.79	0.33	12	0.38	26	0.18	3196	266.333	0.31	10.9	112.5	0	15	1875	1	12	11	11	11	7	0.636364	11	8	0.727273	3	1	5	4AB	4	A	B	1	1	1	1	0
4	2017-10-17 09:02:00	prolonged protocol	23825	27	27	22.38	1	1	2	0	0	7.12	5.86	43.39	0.29	18	0.39	20	0.29	3205	178.056	0.79	11.3	150	0	15	2100	1	18	14	14		6	#DIV/0!	13	7	0.538462	6	1	5	4AB	4	A	B	1	1	1	1	0
4	2016-10-11 09:15:00	prolonged protocol	18212	31	34	23.42	1	1	1	0	0	4.16	6.1	56.4	0.32	39	0.62	26	0.44	3208	145.818	0.63	13	150	0	12	2250	1	22	15	12	12	9	0.75	12	9	0.75	8	1	5	4AB	4	A	B	1	1	1	1	0
4	2017-03-23 10:26:00	prolonged protocol	20374	29	30	20.43	1	1	3	0	0	2.41	6.26	20.22	0.74	12	1.11	12	0.77	3212	169.053	1.31	12	225	0	11	2475	2	19	14	12	12	4	0.333333	12	5	0.416667	1	1	5	3BB	3	B	B	1	1	1	0	1
4	2018-08-14 14:38:00	prolonged protocol	28745	29	33	19.57	0	5	1	0	0	8.37	9.96	35.01	0.52	29	0.41	26	0.5	3220	123.846	0.75	12.1	112.5	0	14	2288	1	26	18	18	19	12	0.631579	19	11	0.578947	5	1	5	4AB	4	A	B	1	1	1	1	0
4	2018-04-16 10:31:00	prolonged protocol	26313	28	30	20.13	0	4	3	0	0	3.18	8.69	41	0.78	26	0.59	9	1.33	3224	403	0.78	11.6	225	0	11	2400	1	8	5	5	5	3	0.6	5	4	0.8	2	1	5	4AC	4	A	C	1	1	1	1	0
4	2018-05-02 15:49:00	prolonged protocol	26039	30	32	18.03	0	3	3	0	0	5.01	6.55	48.58	0.49	28	0.59	15	0.69	3226	161.3	1.32	13	200	0	10	2000	1	20	14	14	16	5	0.3125	16	10	0.625	4	1	5	4BB	4	B	B	1	1	1	1	0
4	2018-01-31 08:48:00	prolonged protocol	25303	33	37	27.06	0	1	1	0	0	7.15	8.12	43.01	0.33	19	0.21	12	0.68	3226	179.222	1.19	11	200	0	13	2950	1	18	11	11	11	5	0.454545	11	6	0.545455	3	1	5	4AB	4	A	B	1	1	1	1	0
4	2017-12-19 10:40:00	prolonged protocol	24751	35	41	18.59	1	1	1	0	0	5.65	7.81	52.49	0.64	16	0.4	19	1.09	3237	231.214	1.14	11	225	0	20	3675	1	14	14	14	14	3	0.214286	14	3	0.214286	1	1	5	4AB	4	A	B	1	1	1	1	0
4	2018-10-01 09:30:00	prolonged protocol	29486	32	35	23.05	1	6	2	0	0	3.18	11.96	19.51	0.37	13	0.31	10	0.57	3249	464.143	0.83	12.5	225	0	12	2700	1	7	6	6	6	4	0.666667	6	6	1	3	1	5	4BA	4	B	A	1	1	1	1	0
4	2018-09-11 08:52:00	prolonged protocol	29170	30	27	22.22	1	1	1	0	0	6.8	6.96	31.59	0.5	17	0.44	16	0.52	3256	171.368	0.86	10.8	150	0	11	2100	1	19	18	18	19	8	0.421053	19	7	0.368421	2	1	5	4AB	4	A	B	1	1	1	1	0
4	2017-08-16 09:06:00	prolonged protocol	22847	24	26	20.03	0	3	1	0	0	3.83	6.44	35.35	0.49	41	0.35	24	1.45	3270	297.273	0.73	13	150	0	9	1200	1	11	8	8	11	11	1	11	6	0.545455	4	1	5	4BB	4	B	B	1	1	1	1	0
4	2017-10-04 14:18:00	prolonged protocol	23628	37	36	22.48	0	2	2	0	0	4.6	5.5	53.9	0.35	24	0.39	14	2.1	3291	329.1	1.23	11.6	225	0	10	2250	1	10	9	8	8	7	0.875	8	4	0.5	0	1	5	3AB	3	A	B	1	1	1	0	1
4	2018-06-01 09:12:00	prolonged protocol	27248	30	30	17.97	1	3	3	0	0	1.6	4.68	22.84	0.16	23	0.46	20	0.19	3310	220.667	0.71	8.4	150	0	11	1875	1	15	6	6	6	2	0.333333	6	3	0.5	2	1	5	4CB	4	C	B	1	1	1	1	0
4	2018-06-30 10:06:00	prolonged protocol	27883	24	37	23.44	1	1	3	0	0	6.59	9.16	32.31	0.51	22	0.96	17	2.11	3311	236.5	1.15	14	150	0	10	1500	1	14	9	9	11	7	0.636364	11	9	0.818182	8	1	5	4AB	4	A	B	1	0	2	0	0
4	2018-03-06 11:10:00	prolonged protocol	24458	30	29	20.81	0	6	1	0	0	2.54	6.92	30.81	0.54	29	0.48	9	0.47	3311	183.944	0.66	13.5	300	0	15	4725	1	18	14	14	14	11	0.785714	14	9	0.642857	3	1	5	4AB	4	A	B	1	0	2	0	0
4	2018-09-17 08:49:00	prolonged protocol	29254	25	26	20.4	0	1	1	0	0	2.41	6.34	60.06	0.39	28	0.21	12	0.59	3314	254.923	0.73	12.9	225	1	10	2400	1	13	10	10	10	8	0.8	10	7	0.7	3	1	5	4AB	4	A	B	1	1	1	1	0
4	2018-07-21 12:05:00	prolonged protocol	28310	31	30	20.81	1	10	2	0	0	2.98	5.66	47.69	0.07	22	0.47	14	0.22	3317	276.417	0.44	11.4	225	0	11	2475	2	12	9	9	11	4	0.363636	11	6	0.545455	3	1	5	4BB	4	B	B	1	1	1	1	0
4	2017-03-30 09:08:00	prolonged protocol	20500	27	29	22.04	0	3	2	0	1	1.8	7.36	63.1	0.28	32	1.01	20	0.7	3330	144.783	1.3	11.2	150	0	10	1875	2	23	13	12	12	5	0.416667	12	9	0.75	4	1	5	4AA	4	A	A	1	1	1	1	0
4	2017-07-19 10:21:00	prolonged protocol	22376	25	30	21.23	0	4	3	1	0	4.05	8.06	37.13	0.23	33	0.21	21	0.37	3331	158.619	0.47	8.1	150	1	11	1763	1	21	17	17	19	9	0.473684	19	12	0.631579	8	1	5	4BB	4	B	B	1	1	1	1	0
4	2018-03-27 11:31:00	prolonged protocol	25939	35	35	23.01	0	3	2	0	0	3.15	5.8	66.97	0.44	25	0.34	10	0.37	3339	371	1.06	10.4	225	0	14	4200	1	9	7	7	7	3	0.428571	7	5	0.714286	2	1	5	4BA	4	B	A	1	1	1	1	0
4	2017-12-26 09:17:00	prolonged protocol	24844	35	36	18.73	1	1	2	0	0	8.26	10.45	44.84	0.64	12	0.23	15	1.53	3353	257.923	0.86	11	225	0	12	2625	1	13	8	8	8	6	0.75	8	5	0.625	1	1	5	4BB	4	B	B	1	0	2	0	0
4	2018-10-08 09:58:00	prolonged protocol	28005	27	30	18.37	0	3	3	0	1	7.96	8.7	47.76	0.44	12	1.01	27	0.79	3357	152.591	1.08	13.7	100	0	14	1925	1	22	14	14	17	11	0.647059	17	10	0.588235	4	1	5	4BB	4	B	B	1	1	1	1	0
4	2018-07-09 14:17:00	prolonged protocol	28070	30	30	20.57	0	1	3	0	0	17.49	9.86	24.5	0.21	25	0.39	18	0.62	3364	197.882	0.54	12.5	150	1	11	1650	1	17	14	14	16	8	0.5	16	8	0.5	6	1	5	4AB	4	A	B	1	1	1	1	0
4	2018-01-05 08:13:00	prolonged protocol	23757	30	31	23.05	0	3	1	0	0	4.97	5.84	27.15	0.25	18	0.37	24	0.46	3366	168.3	0.3	8.2	150	0	10	1425	1	20	16	16	17	6	0.352941	17	6	0.352941	0	1	5	3BC	3	B	C	1	1	1	1	0
4	2018-04-05 10:28:00	prolonged protocol	26147	28	30	23.05	1	1	1	0	0	5.02	6.79	55.83	0.46	31	0.89	14	0.56	3371	187.278	1.37	12.5	225	0	10	2550	1	18	9	9	9	6	0.666667	9	5	0.555556	2	1	5	4BB	4	B	B	1	1	1	1	0
4	2016-12-19 10:24:00	prolonged protocol	19215	24	25	18.67	0	5	1	0	0	4.97	4.91	56.1	0.67	25	0.95	25	0.73	3373	168.65	0.99	9.5	100	0	12	1588	1	20	13	13	14	7	0.5	12	9	0.75	8	1	5	4AB	4	A	B	1	1	1	1	0
4	2017-11-09 13:51:00	prolonged protocol	24190	24	27	20.83	1	2	3	0	0	1.49	7.36	12	0.28	12	0.31	16	0.89	3379	225.267	0.48	9.6	150	0	10	2175	1	15	14	14	15	7	0.466667	15	12	0.8	3	1	5	4BB	4	B	B	1	1	1	1	0
4	2017-08-15 10:53:00	prolonged protocol	22820	26	30	17.72	0	1	4	0	0	3.53	6.69	61.93	0.62	39	0.33	11	0.82	3381	260.077	1.01	11.3	225	0	12	3038	1	13	9	9	10	7	0.7	10	4	0.4	2	1	5	4AB	4	A	B	1	1	1	1	0
4	2017-10-27 08:28:00	prolonged protocol	23996	32	28	20.7	1	1	1	0	0	9.37	9.19	68.67	0.62	31	0.86	20	0.91	3384	241.714	0.81	9	150	0	13	2175	1	14	10	9	9	5	0.555556	9	6	0.666667	4	1	5	4AB	4	A	B	1	1	1	1	0
4	2017-02-15 10:43:00	prolonged protocol	19709	25	24	19.14	0	2	3	0	0	8.1	6.01	42.93	0.4	20	0.74	31	0.97	3400	188.889	0.86	11.2	112.5	0	9	900	1	18	16	16	16	10	0.625	14	12	0.857143	5	1	5	4AB	4	A	B	1	1	1	0	1
4	2017-01-23 15:52:00	prolonged protocol	19558	24	27	21.21	0	2	1	0	1	12.89	7.97	56.92	0.64	30	0.79	18	0.72	3400	141.667	0.61	11.9	112.5	0	9	1050	1	24	18	18	18	11	0.611111	16	13	0.8125	8	1	5	4AA	4	A	A	1	1	1	1	0
4	2018-06-05 08:48:00	prolonged protocol	27316	37	41	20.69	1	3	2	0	0	6.23	7.53	38.09	0.62	26	0.21	34	1.11	3424	131.692	0.84	12.1	175	0	10	1850	2	26	18	18	18	2	0.111111	18	3	0.166667	2	1	5	4AB	4	A	B	1	1	2	0	0
4	2016-09-01 14:49:00	prolonged protocol	16683	27	31	23.73	0	1	4	0	0	3.42	6.77	24.6	0.35	28	0.52	10	0.44	3432	180.632	1.54	14.9	150	0	13	2400	1	19	9	9	9	5	0.555556	7	6	0.857143	2	1	5	4AB	4	A	B	1	1	1	1	0
4	2018-10-08 10:10:00	prolonged protocol	29559	28	26	20.31	1	3	1	0	0	17.6	11.02	103.69	1.07	21	0.84	15	5.52	3432	245.143	0.97	9.7	150	0	11	2100	1	14	10	9	9	6	0.666667	9	3	0.333333	2	1	5	4AB	4	A	B	1	1	1	1	0
4	2018-05-18 10:23:00	prolonged protocol	26986	33	30	19.23	1	3	3	0	0	5.47	8.82	38.43	0.2	21	0.34	20	0.24	3435	229	1.13	14	225	0	11	2850	1	15	11	11	12	3	0.25	12	4	0.333333	1	1	5	4BB	4	B	B	1	1	1	0	1
4	2017-08-28 10:55:00	prolonged protocol	23043	23	28	22.04	0	2	2	0	0	4.35	6.26	51.01	0.37	38	0.65	24	0.71	3466	192.556	0.7	8.3	150	0	9	1350	2	18	16	16	17	13	0.764706	17	13	0.764706	11	1	5	4AB	4	A	B	1	1	1	0	1
4	2018-10-08 10:38:00	prolonged protocol	29561	29	29	23.59	1	3	1	0	1	2.35	2.87	66.79	0.26	19	0.63	30	0.54	3472	144.667	0.53	8.5	225	0	11	1875	1	24	13	12	13	5	0.384615	13	9	0.692308	8	1	5	4BA	4	B	A	1	1	1	1	0
4	2017-12-18 15:04:00	prolonged protocol	24734	31	33	24.34	0	12	3	0	0	2.24	5.17	72.95	0.62	49	0.3	18	0.61	3483	248.786	1.83	13.7	150	0	10	1575	2	14	9	9	10	5	0.5	10	4	0.4	3	1	5	4AB	4	A	B	1	1	1	1	0
4	2017-04-06 13:48:00	prolonged protocol	20638	34	38	26.81	1	2	2	0	1	6.1	3.2	48.49	0.37	39	0.38	35	0.18	3488	193.778	0.51	12	150	0	11	1650	1	18	16	16	16	8	0.5	16	7	0.4375	5	1	5	4AA	4	A	A	1	1	1	1	0
4	2017-08-29 09:15:00	prolonged protocol	23058	29	29	23.31	1	3	1	0	1	6.59	7.53	47.46	0.27	31	0.21	34	0.07	3513	195.167	0.39	13.2	150	0	14	2213	1	18	11	11	11	6	0.545455	11	8	0.727273	6	1	5	4AB	4	A	B	1	1	1	1	0
4	2018-06-22 10:51:00	prolonged protocol	27700	29	34	19.63	1	2	1	0	0	3.45	7.51	41.97	0.22	16	0.46	21	0.96	3533	294.417	0.59	11.2	225	0	11	2325	1	12	10	10	10	5	0.5	10	4	0.4	4	1	5	4AB	4	A	B	1	1	1	1	0
4	2018-07-12 10:13:00	prolonged protocol	26111	26	45	18.22	0	4	3	0	0	6.38	6.87	61.91	0.52	33	0.3	27	1.22	3546	236.4	0.53	10.1	175	0	8	1325	2	15	5	4	4	1	0.25	4	1	0.25	0	1	5	4BB	4	B	B	1	0	2	0	0
4	2018-05-16 11:18:00	prolonged protocol	26940	31	31	18.49	1	2	1	0	0	4.81	7.02	63.54	0.34	12	0.25	15	0.27	3554	253.857	1.35	10.8	150	0	12	2425	1	14	12	12	12	4	0.333333	12	5	0.416667	1	1	5	4BB	4	B	B	1	1	1	1	0
4	2018-01-11 14:24:00	prolonged protocol	25058	27	27	21.1	0	1	1	1	0	8.16	6.02	41.23	0.28	24	0.45	12	0.97	3576	298	0.66	18	225	0	10	2250	1	12	10	10	10	7	0.7	10	7	0.7	2	1	5	5BB	5	B	B	1	1	1	1	0
4	2017-11-13 09:56:00	prolonged protocol	24232	27	30	21.48	0	3	4	0	0	3.79	9.18	28.79	0.54	15	1.69	11	0.42	3586	179.3	1.29	12.9	225	0	13	3075	1	20	16	15	15	6	0.4	15	13	0.866667	6	1	5	4AB	4	A	B	1	1	1	1	0
4	2017-05-22 10:44:00	prolonged protocol	21391	29	27	19.83	1	5	1	0	0	2.1	5.71	40.76	0.53	27	0.33	13	0.42	3609	212.294	1.61	12	150	0	11	2175	1	17	13	13	13	8	0.615385	13	9	0.692308	7	1	5	4AA	4	A	A	1	1	1	1	0
4	2017-07-31 10:52:00	prolonged protocol	22584	28	28	18.81	0	2	2	0	0	2.61	5.77	29.14	0.66	26	0.48	24	1.21	3627	226.688	1.27	10.8	100	0	12	1350	2	16	11	11	12	7	0.583333	12	5	0.416667	2	1	5	4BB	4	B	B	1	1	1	1	0
4	2018-01-19 08:56:00	prolonged protocol	25177	28	30	20.28	1	1	1	0	0	5.81	8.26	43.68	0.29	19	0.55	17	0.37	3638	259.857	0.58	10.2	225	0	11	2475	1	14	10	9	9	5	0.555556	9	3	0.333333	1	1	5	4BB	4	B	B	1	1	1	1	0
4	2017-09-12 09:14:00	prolonged protocol	23291	35	40	22.48	1	1	1	0	0	2.85	5.35	44.62	0.58	14	0.38	17	1.02	3647	202.611	0.59	12.5	225	0	11	2175	1	18	11	11	11	10	0.909091	11	10	0.909091	4	1	5	4AB	4	A	B	1	1	1	1	0
4	2017-11-28 09:37:00	prolonged protocol	24441	28	31	24.67	0	3	3	0	1	3.36	6.62	42.8	0.59	16	0.84	31	0.97	3651	280.846	0.82	11.9	112.5	0	10	1150	1	13	9	9	9	4	0.444444	9	5	0.555556	2	1	5	4BB	4	B	B	1	1	1	1	0
4	2018-03-02 13:49:00	prolonged protocol	25543	33	38	18.67	0	6	1	0	0	9.06	4.11	38.39	0.64	50	0.25	8	0.98	3668	407.556	0.83	12.1	300	0	12	3300	1	9	5	5	5	1	0.2	5	1	0.2	0	1	5	3BC	3	B	C	1	1	1	1	0
4	2017-06-16 11:04:00	prolonged protocol	19774	33	46	21.78	1	10	3	0	0	3.7	8.36	55.92	0.15	27	0.38	12	0.67	3669	305.75	0.79	8	300	0	10	2850	1	12	9	9	9	6	0.666667	9	4	0.444444	1	1	5	4AB	4	A	B	1	1	1	0	1
4	2018-10-17 10:39:00	prolonged protocol	29728	30	34	19.48	0	2	1	0	0	4.7	6.42	53.19	0.36	24	0.21	16	0.25	3692	461.5	0.39	14	150	0	11	1650	2	8	5	5	5	4	0.8	5	3	0.6	1	1	5	4BC	4	B	C	1	1	1	1	0
4	2016-07-07 16:12:00	prolonged protocol	16900	27	28	21.78	0	1	1	0	1	5.07	6.39	57.8	0.38	35	0.4	20	0.48	3720	206.667	0.55	10.09	150	0	18	2521	1	18	8	8	10	7	0.7	8	3	0.375	2	1	5	4AB	4	A	B	1	1	1	1	0
4	2018-01-23 09:54:00	prolonged protocol	25228	27	27	20.4	0	5	3	0	0	2.46	5.18	43.9	0.35	16	0.32	10	1.04	3735	249	0.87	11.9	187.5	0	9	1650	1	15	11	11	11	6	0.545455	11	2	0.181818	0	1	5	3BC	3	B	C	1	1	1	0	1
4	2018-05-02 13:50:00	prolonged protocol	26650	37	47	26.04	0	3	1	0	0	3.16	6.46	53.44	0.34	16	0.52	13	1.21	3749	312.417	1.11	9.8	300	0	11	3188	1	12	7	7	7	5	0.714286	7	4	0.571429	3	1	5	4AB	4	A	B	1	1	2	0	0
4	2017-07-17 10:24:00	prolonged protocol	22326	29	31	17.93	0	3	2	0	0	7.38	8.6	40.95	0.32	21	0.66	21	0.59	3751	250.067	0.41	10.1	112.5	0	13	1725	2	15	10	9	9	5	0.555556	9	3	0.333333	2	1	5	4BB	4	B	B	1	1	1	1	0
4	2018-08-30 15:19:00	prolonged protocol	29003	30	27	19.95	0	2	1	1	0	4.32	8.33	69.42	0.61	20	0.41	13	1.16	3756	341.455	0.95	11.6	225	0	11	2175	1	11	9	9	9	5	0.555556	9	7	0.777778	4	1	5	4BB	4	B	B	1	0	2	0	0
4	2017-10-17 09:40:00	prolonged protocol	23828	28	28	20.32	1	2	3	0	0	7.18	10.08	48.73	0.29	15	0.28	12	0.49	3760	268.571	0.51	10	225	0	16	3750	0	14	10	10	10	7	0.7	10	4	0.4	2	1	5	4AB	4	A	B	1	1	1	0	1
4	2018-03-28 08:52:00	prolonged protocol	25958	31	25	23.31	1	3	1	0	0	5.15	5.16	35	0.67	26	0.82	28	0.48	3762	268.714	1.47	13.5	150	0	11	1800	1	14	9	9	10	3	0.3	10	5	0.5	2	1	5	4BB	4	B	B	1	1	1	1	0
4	2018-03-22 11:03:00	prolonged protocol	25868	23	36	19.1	0	5	3	0	0	4.49	10.84	33.34	0.25	31	0.49	22	0.26	3789	236.812	0.62	12.6	100	0	19	3050	1	16	11	10	10	3	0.3	10	5	0.5	3	1	5	4BC	4	B	C	1	1	1	1	0
4	2018-03-29 11:06:00	prolonged protocol	25998	35	34	18.31	1	4	1	0	0	4.15	6.59	68.98	0.67	35	0.43	11	0.5	3795	345	0.5	8.3	225	0	13	2625	1	11	8	8	8	6	0.75	8	8	1	7	1	5	4BB	4	B	B	1	1	1	1	0
4	2016-11-01 09:37:00	prolonged protocol	18473	31	36	24.22	1	2	3	0	0	4.71	8.24	50.1	0.49	25	0.53	21	0.82	3803	200.158	0.52	11.8	150	0	11	1500	1	19	17	17	17	11	0.647059	15	6	0.4	0	1	5	3BB	3	B	B	1	1	1	0	1
4	2018-05-23 09:47:00	prolonged protocol	27066	34	35	19.03	1	2	2	0	0	3.51	7.3	46.7	0.43	22	0.84	16	0.63	3814	272.429	0.76	14	225	0	10	2175	2	14	10	10	10	6	0.6	10	8	0.8	5	1	5	4BB	4	B	B	1	1	1	1	0
4	2017-07-20 11:30:00	prolonged protocol	22399	34	36	19.57	1	1	2	0	1	7.52	4.39	42.47	0.58	25	0.73	19	0.91	3820	181.905	0.34	10.8	200	0	9	1450	1	21	15	15	16	11	0.6875	16	11	0.6875	6	1	5	4BB	4	B	B	1	0	2	0	0
4	2018-04-25 10:22:00	prolonged protocol	26509	30	33	19.95	1	3	1	1	0	9.07	4.9	48.35	0.64	24	0.42	18	2.68	3833	239.562	0.88	12.4	150	0	12	1725	1	16	15	15	15	12	0.8	15	9	0.6	3	1	5	4BB	4	B	B	1	1	1	1	0
4	2016-10-06 09:28:00	prolonged protocol	14529	28	33	18.31	1	4	1	0	0	3.5	6.5	47.7	0.3	20	0.3	9	0.29	3842	349.273	0.6	11.2	150	0	13	2550	0	11	10	10	10	10	1	10	5	0.5	2	1	5	4AB	4	A	B	1	0	2	0	0
4	2018-04-16 08:17:00	prolonged protocol	17048	32	30	20.43	0	2	2	0	0	2.92	6.22	26.13	0.81	26	0.46	14	0.69	3869	257.933	1.38	11	300	0	11	3300	1	15	11	11	11	7	0.636364	11	7	0.636364	3	1	5	4AB	4	A	B	1	1	1	1	0
4	2017-02-23 09:25:00	prolonged protocol	19825	28	30	19.91	0	3	2	0	0	3.39	6.66	55.04	0.34	15	0.4	12	0.12	3877	430.778	0.65	10.5	150	0	12	1425	2	9	6	6	6	3	0.5	6	2	0.333333	1	1	5	4BB	4	B	B	1	0	2	0	0
4	2017-10-17 10:13:00	prolonged protocol	23835	25	26	15.6	0	2	2	0	0	6.67	8.5	48.38	0.41	23	0.31	19	0.64	3877	258.467	0.51	13	150	0	12	1575	2	15	9	8	8	2	0.25	8	5	0.625	0	1	5	3BB	3	B	B	1	0	2	0	0
4	2018-08-30 15:44:00	prolonged protocol	29005	31	37	20.2	0	4	2	0	0	6.25	5.65	23.32	0.49	27	0.73	15	0.62	3878	228.118	0.63	11.1	225	0	12	2325	1	17	15	15	15	6	0.4	15	5	0.333333	2	1	5	4BB	4	B	B	1	1	1	1	0
4	2018-06-21 08:31:00	prolonged protocol	26592	31	35	20.55	0	2	1	0	0	3.44	7.88	53.91	0.54	24	0.84	19	0.77	3883	298.692	0.86	13.5	150	0	12	2550	1	13	11	11	11	3	0.272727	11	4	0.363636	1	1	5	4AB	4	A	B	1	1	1	1	0
4	2018-04-24 11:26:00	prolonged protocol	26489	31	37	22.49	0	10	3	0	1	3.92	6.6	37.94	0.32	27	0.31	19	0.64	3904	205.474	0.7	10.1	200	0	10	2375	2	19	11	11	11	7	0.636364	11	9	0.818182	6	1	5	4AB	4	A	B	1	1	1	1	0
4	2017-07-05 14:07:00	prolonged protocol	22125	34	37	19.23	1	1	1	0	0	3.15	5.06	49.61	0.18	17	0.49	15	0.25	3920	156.8	1.09	9.9	150	0	11	2100	1	25	15	14	14	8	0.571429	14	4	0.285714	1	1	5	4BB	4	B	B	1	1	1	1	0
4	2017-06-13 11:31:00	prolonged protocol	21711	28	30	19.98	0	1	2	0	1	6.02	6.26	42.63	0.55	29	0.43	22	0.68	3933	135.621	1.1	13.1	225	1	8	1800	2	29	15	14	14	4	0.285714	14	5	0.357143	2	1	5	4AB	4	A	B	1	1	1	1	0
4	2017-10-31 08:25:00	prolonged protocol	24037	31	33	18.29	1	2	1	0	0	2.51	7.28	25.78	0.44	18	0.72	20	0.21	3940	197	1.28	11.6	200	0	11	2300	1	20	12	11	12	3	0.25	12	7	0.583333	3	1	5	4AB	4	A	B	1	1	1	1	0
4	2017-09-06 09:31:00	prolonged protocol	23170	31	30	20.93	1	3	1	0	0	2.84	5.24	65.79	0.2	17	0.26	16	0.35	3947	263.133	0.75	11.7	225	0	13	2700	1	15	11	10	10	4	0.4	10	5	0.5	3	1	5	4AB	4	A	B	1	1	1	0	1
4	2016-08-09 09:50:00	prolonged protocol	17308	29	29	23.63	1	2	1	0	0	6.63	5.94	44	0.54	23	0.2	18	0.77	4002	181.909	0.71	9.1	150	0	13	2625	1	22	12	12	14	7	0.5	12	8	0.666667	3	1	5	4BB	4	B	B	1	1	1	1	0
4	2016-12-07 10:39:00	prolonged protocol	19053	32	33	18.66	0	1	3	0	0	3.31	5.71	31.81	0.28	13	0.64	17	0.42	4004	210.737	0.95	14.3	150	0	12	1650	1	19	12	12	12	4	0.333333	12	7	0.583333	4	1	5	4AA	4	A	A	1	1	1	1	0
4	2018-06-25 09:44:00	prolonged protocol	27736	27	27	22.68	0	2	1	0	0	9.65	9.37	44	0.19	27	0.69	24	0.42	4018	182.636	1.09	12	150	0	9	1575	1	22	10	9	13	8	0.615385	13	7	0.538462	4	1	5	4AB	4	A	B	1	1	1	0	1
4	2018-10-05 09:15:00	prolonged protocol	29524	31	35	21.63	0	10	3	0	0	3.5	4.22	21.9	0.35	12	0.36	14	1.01	4040	269.333	0.87	11.1	225	0	9	2025	1	15	7	6	6	4	0.666667	6	5	0.833333	2	1	5	4BB	4	B	B	1	1	1	1	0
4	2018-09-20 10:35:00	prolonged protocol	29326	24	32	17.86	0	3	4	0	0	3.12	7.1	37.59	1.05	12	0.34	15	1.55	4041	168.375	0.77	9.3	212.5	1	8	1625	1	24	19	19	19	15	0.789474	19	7	0.368421	5	1	5	4AB	4	A	B	1	1	1	1	0
4	2018-10-15 11:25:00	prolonged protocol	29688	42	41	20.81	0	16	3	0	0	5.84	10.02	59.21	0.71	42	0.31	14	1	4045	337.083	0.27	12	300	0	16	4800	1	12	10	10	10	2	0.2	10	1	0.1	0	1	5	4BC	4	B	C	1	1	1	1	1
4	2018-06-01 11:19:00	prolonged protocol	27261	25	30	19.43	0	2	1	0	0	3.45	4.85	36	0.32	21	0.39	17	0.82	4058	169.083	1.34	17.7	150	0	10	1425	1	24	11	11	11	1	0.0909091	11	4	0.363636	1	1	5	4CB	4	C	B	1	1	1	1	0
4	2018-04-17 10:30:00	prolonged protocol	26349	26	30	19.14	0	3	1	0	0	4.53	7.26	53.21	0.75	36	0.8	21	1.71	4078	407.8	0.59	13	100	0	10	1250	1	10	6	6	6	2	0.333333	6	5	0.833333	1	1	5	4BB	4	B	B	1	0	2	0	0
4	2018-09-25 10:49:00	prolonged protocol	29380	34	33	22.58	1	6	1	0	0	2.07	5.31	57.18	0.59	32	0.26	18	1.3	4104	216	0.81	13.4	200	0	9	1700	1	19	17	17	19	5	0.263158	19	7	0.368421	6	1	5	4BA	4	B	A	1	1	1	1	0
4	2017-02-04 10:26:00	prolonged protocol	19585	31	31	17.57	1	1	3	1	0	3.9	6.81	49.3	0.79	35	0.94	13	1.32	4109	273.933	0.65	15	150	0	11	2100	2	15	11	10	10	8	0.8	8	5	0.625	2	1	5	4AB	4	A	B	1	1	1	1	0
4	2017-06-14 11:52:00	prolonged protocol	21732	28	31	19.15	1	2	1	1	0	0.35	5.22	12.89	0.33	28	0.52	17	0.44	4112	274.133	1.22	10	150	0	14	3300	1	15	14	14	14	9	0.642857	14	8	0.571429	5	1	5	4AA	4	A	A	1	0	2	0	0
4	2018-07-06 10:32:00	prolonged protocol	28007	28	41	18.05	1	3	2	0	0	2.4	5.33	32.83	0.34	20	0.21	17	0.36	4168	148.857	1.1	6.3	112.5	0	11	1538	1	28	27	27	28	16	0.571429	28	9	0.321429	9	1	5	4BB	4	B	B	1	1	1	0	1
4	2016-10-25 10:54:00	prolonged protocol	18379	25	28	22.55	0	7	3	0	0	4.2	5.77	35.3	0.29	24	0.7	20	0.37	4173	198.714	0.85	13.9	100	0	11	1250	2	21	18	18	18	7	0.388889	16	8	0.5	2	1	5	4AB	4	A	B	1	1	1	1	0
4	2018-05-29 14:41:00	prolonged protocol	26789	32	32	28.13	1	3	2	0	0	3.96	7.64	46.41	1.08	17	0.37	21	0.96	4177	232.056	1.29	11	112.5	0	12	2400	2	18	13	13	13	9	0.692308	13	7	0.538462	4	1	5	4AB	4	A	B	1	1	1	1	0
4	2018-05-04 14:05:00	prolonged protocol	26714	31	35	19.92	1	2	1	1	0	5.58	6.33	67.33	0.7	30	0.23	18	1.84	4188	299.143	0.49	10.9	225	0	9	2025	1	14	5	5	6	2	0.333333	6	3	0.5	1	1	5	4BB	4	B	B	1	1	1	0	1
4	2017-09-05 14:08:00	prolonged protocol	23161	32	34	19.17	0	2	1	0	0	7.26	8.8	56.16	0.82	12	0.21	16	1.23	4192	299.429	1.17	10.5	150	0	11	2175	1	14	11	11	11	9	0.818182	11	9	0.818182	5	1	5	4AB	4	A	B	1	1	1	1	0
4	2018-04-17 15:22:00	prolonged protocol	26360	32	33	22.04	1	1	1	0	0	4.2	8.8	46.78	0.41	25	0.91	16	1.5	4203	247.235	0.5	14	150	0	11	1500	1	17	12	11	13	6	0.461538	13	9	0.692308	6	1	5	4AB	4	A	B	1	1	1	1	0
4	2017-11-29 15:05:00	prolonged protocol	24472	31	32	23.81	1	1	3	0	1	13.15	6.67	41.16	0.37	16	0.46	30	0.39	4209	420.9	0.29	13.5	112.5	0	15	1988	1	10	3	3	3	1	0.333333	3	3	1	3	1	5	4BB	4	B	B	1	1	1	0	1
4	2018-07-19 10:24:00	prolonged protocol	28273	37	37	15.81	1	1	3	0	0	6.69	6.18	35.84	0.6	23	0.79	18	0.83	4212	221.684	0.81	9.9	225	0	11	2250	1	19	17	17	17	8	0.470588	17	11	0.647059	4	1	5	4BA	4	B	A	1	1	1	1	0
4	2017-04-27 10:36:00	prolonged protocol	45	36	38	20.89	1	9	1	1	0	1.28	5.99	60.88	1.02	41	0.35	18	2.5	4239	264.938	0.61	10.5	150	0	8	1200	1	16	12	12	12	8	0.666667	12	9	0.75	6	1	5	4AB	4	A	B	1	0	2	0	0
4	2018-08-17 14:02:00	prolonged protocol	28806	40	43	29.38	1	4	3	0	1	4.11	6.79	30.65	0.24	39	0.32	24	0.74	4247	157.296	0.91	10.5	225	0	11	2625	1	27	22	22	22	5	0.227273	22	7	0.318182	2	1	5	4BB	4	B	B	1	1	1	1	0
4	2017-10-19 09:30:00	prolonged protocol	23873	28	28	17.78	1	2	3	0	0	8.11	5.15	21.19	0.77	12	0.21	23	1.06	4254	303.857	0.56	10.4	150	0	9	1200	1	14	10	10	11	7	0.636364	11	9	0.818182	5	1	5	5AB	5	A	B	1	0	2	0	0
4	2018-09-12 10:41:00	prolonged protocol	29197	24	23	23.23	1	1	1	0	0	3.59	6.65	26.17	0.25	21	1.23	22	0.27	4255	212.75	0.8	11.2	112.5	0	12	1725	1	20	17	17	17	2	0.117647	17	7	0.411765	1	1	5	4AC	4	A	C	1	1	1	0	1
4	2018-09-03 09:17:00	prolonged protocol	29031	24	31	18.14	0	3	3	0	1	7.69	5.75	36.12	0.58	22	0.28	35	1.38	4261	387.364	0.48	14.4	150	0	12	1500	2	11	10	10	10	6	0.6	10	6	0.6	4	1	5	4BB	4	B	B	1	1	1	1	0
4	2016-11-21 12:16:00	prolonged protocol	18770	33	36	19	0	5	3	0	0	2.95	4.64	30.6	0.59	25	0.69	23	0.61	4269	177.875	1.47	12.2	225	0	10	2625	2	24	15	15	15	5	0.333333	13	5	0.384615	0	1	5	4BC	4	B	C	1	1	1	1	0
4	2017-12-06 08:55:00	prolonged protocol	23281	34	36	21.46	1	1	2	0	0	3.3	6.06	66.61	0.19	17	0	14	0.3	4285	306.071	0.92	9.3	187.5	0	12	2550	1	14	10	10	12	7	0.583333	12	3	0.25	1	1	5	4BB	4	B	B	1	1	1	1	0
4	2018-09-24 09:28:00	prolonged protocol	29366	28	29	18.49	0	2	1	0	1	6.87	6.29	54.26	0.58	38	0.39	14	0.32	4296	358	1.41	13	150	0	10	1500	1	12	4	4	5	4	0.8	5	4	0.8	3	1	5	4AB	4	A	B	1	0	2	0	0
4	2017-05-23 15:34:00	prolonged protocol	20631	31	36	17.9	0	5	2	0	0	10.47	7.76	50.79	0.31	26	0.33	27	0.29	4297	268.562	0.78	11.1	150	0	9	1350	1	16	10	10	13	8	0.615385	13	7	0.538462	6	1	5	5AB	5	A	B	1	1	1	1	0
4	2018-03-14 14:56:00	prolonged protocol	25735	26	29	20.7	1	1	1	0	0	7.35	6.25	25.9	0.53	24	0.46	20	1.12	4323	480.333	0.8	11.7	175	1	11	2075	1	9	7	7	7	4	0.571429	7	4	0.571429	3	1	5	4BB	4	B	B	1	1	1	1	0
4	2018-01-16 08:44:00	prolonged protocol	23462	30	31	18.13	1	3	3	0	0	3.29	6.89	66.79	0.22	25	0.29	13	0.38	4327	216.35	0.67	10.7	150	0	14	3075	1	20	17	17	17	7	0.411765	17	12	0.705882	9	1	5	4AB	4	A	B	1	1	1	1	0
4	2017-09-18 11:26:00	prolonged protocol	23374	34	34	21.09	0	5	3	1	0	5.18	9.89	85.06	0.53	16	0.21	10	0.96	4348	362.333	1.06	15.3	225	0	10	2425	1	12	7	7	7	5	0.714286	7	4	0.571429	2	1	5	4BB	4	B	B	1	1	1	1	0
4	2017-11-09 14:23:00	prolonged protocol	24193	34	34	19.92	1	1	2	0	0	4.43	6.76	106.2	0.5	18	0.38	11	0.88	4365	256.765	0.74	12.9	225	0	11	2688	2	17	11	10	11	6	0.545455	11	5	0.454545	1	1	5	3AB	3	A	B	1	1	1	1	0
4	2018-03-26 11:01:00	prolonged protocol	25903	35	36	19.63	1	1	1	0	0	3.13	5.69	34	0.39	23	0.4	14	0.79	4366	207.905	0.92	7.1	300	0	11	3300	1	21	17	17	18	8	0.444444	18	7	0.388889	1	1	5	4BB	4	B	B	1	1	1	1	0
4	2017-01-23 16:19:00	prolonged protocol	19560	26	26	24.31	0	2	3	0	0	3.61	6.42	34.9	0.76	36	0.79	12	1.1	4378	243.222	1.06	9	150	0	14	2588	1	18	15	15	16	5	0.3125	16	10	0.625		1	5	4AB	4	A	B	1	1	1	1	0
4	2017-08-24 11:40:00	prolonged protocol	22990	29	28	22.66	1	2	1	0	0	14.62	8.99	67.42	0.53	25	0.46	15	0.81	4385	199.318	1.09	9.6	225	0	13	3225	1	22	21	21	21	13	0.619048	21	12	0.571429	4	1	5	4BB	4	B	B	1	1	1	1	0
4	2017-08-22 10:01:00	prolonged protocol	22948	27	29	20.83	1	1	3	0	0	4.6	6.7	43	0.41	39	0.17	24	0.44	4388	230.947	0.27	8.9	112.5	0	18	3113	1	19	18	18	18	11	0.611111	18	11	0.611111	4	1	5	4BB	4	B	B	1	1	1	1	0
4	2018-04-30 10:01:00	prolonged protocol	26603	28	26	20.81	0	3	1	0	0	3.42	4.92	37.36	0.39	16	1	11	0.46	4399	231.526	0.72	9.2	225	0	12	2663	1	19	15	15	15	4	0.266667	15	7	0.466667	5	1	5	4BB	4	B	B	1	1	1	1	0
4	2016-11-15 14:58:00	prolonged protocol	18684	28	29	20.45	0	3	1	0	0	3.12	6.48	67.7	0.54	16	0.66	13	0.97	4407	367.25	1.29	12	112.5	0	13	1650	2	12	9	9	9	5	0.555556	7	6	0.857143	1	1	5	4AB	4	A	B	1	1	1	1	0
4	2018-08-24 14:46:00	prolonged protocol	23878	21	25	16.22	0	2	2	0	1	10.62	8.21	78.11	0.24	38	0.31	34	0.64	4425	442.5	0.6	9.6	175	0	11	1663	2	10	9	9	9	6	0.666667	9	5	0.555556	3	1	5	4BA	4	B	A	1	1	1	1	0
4	2018-10-22 11:15:00	prolonged protocol	29794	27	27	22.58	0	1	1	0	0	4.51	6.91	69.88	0.45	19	0.39	11	1.36	4432	554	0.47	11	225	0	13	2925	1	8	7	7	7	4	0.571429	7	3	0.428571	2	1	5	4AB	4	A	B	1	1	1	1	0
4	2017-06-30 08:49:00	prolonged protocol	21260	34	34	21.09	0	5	2	0	0	4.49	8	40.15	0.47	12	0.35	15	0.67	4457	278.562	1.64	9.1	200	0	10	1875	1	16	11	11	14	8	0.571429	14	13	0.928571	13	1	5	5AB	5	A	B	1	1	1	1	0
4	2017-07-27 11:51:00	prolonged protocol	21883	32	35	18.99	1	1	3	1	0	5.13	8.15	96.73	0.67	38	0.41	23	0.76	4489	408.091	0.69	11	150	0	14	1800	1	11	9	9	9	4	0.444444	9	8	0.888889	2	1	5	4BB	4	B	B	1	1	1	1	0
4	2016-07-11 14:07:00	prolonged protocol	16937	33	35	27.69	0	3	1	0	0	1.84	6.78	37.8	0.22	32	0.39	29	0.25	4491	149.7	1.04	13.3	150	0	12	2325	1	30	21	21	21	14	0.666667	19	9	0.473684	6	1	5	4BB	4	B	B	1	1	1	0	1
4	2017-11-22 11:00:00	prolonged protocol	24360	27	27	22.66	0	3	3	0	0	3.74	7.45	34.21	0.97	12	0.93	22	1.36	4508	237.263	1.08	10.7	150	0	12	2250	2	19	12	12	12	7	0.583333	12	8	0.666667	3	1	5	4AB	4	A	B	1	0	2	0	0
4	2018-08-04 08:30:00	prolonged protocol	28558	30	30	27.22	1	1	2	0	0	1.15	6.38	37.07	0.46	24	0.56	18	0.99	4514	225.7	0.81	11.6	225	0	10	2175	2	20	11	11	11	4	0.363636	11	3	0.272727	2	1	5	4BB	4	B	B	1	0	2	0	0
4	2018-08-20 11:21:00	prolonged protocol	28847	29	31	20.03	0	2	1	0	0	4.84	6.97	58.59	0.55	39	0.53	22	0.48	4535	283.438	0.89	10.8	150	0	9	1275	1	16	13	13	14	7	0.5	14	6	0.428571	4	1	5	4AB	4	A	B	1	1	1	1	0
4	2018-05-17 08:45:00	prolonged protocol	26949	27	29	23.45	0	4	1	0	1	11.77	6.98	54.35	0.66	20	0.7	33	0.55	4536	283.5	0.56	10.7	100	0	17	2488	1	16	12	12	13	7	0.538462	13	10	0.769231	8	1	5	4BB	4	B	B	1	1	1	1	0
4	2017-12-13 10:11:00	prolonged protocol	24662	29	27	17.63	1	2	1	0	1	11.92	9.67	56.25	0.55	27	0.53	26	1.17	4544	267.294	0.33	10.2	100	0	13	1475	1	17	12	12	12	4	0.333333	12	8	0.666667	4	1	5	4BB	4	B	B	1	1	1	1	0
4	2018-06-27 09:58:00	prolonged protocol	27784	28	32	21.67	0	5	3	0	0	6.71	10.25	64.99	0.58	49	0.31	18	0.59	4571	268.882	1.37	12.3	187.5	0	13	2325	2	17	15	15	15	13	0.866667	15	13	0.866667	8	1	5	4AB	4	A	B	1	1	1	0	1
4	2017-06-01 09:01:00	prolonged protocol	21552	28	38	19.14	1	2	3	0	0	7.71	6.4	37.64	0.58	18	0.13	24	0.46	4605	270.882	0.56	9	112.5	0	11	1388	1	17	14	14	14	10	0.714286	14	8	0.571429	6	1	5	4AA	4	A	A	1	1	1	1	0
4	2018-05-22 09:52:00	prolonged protocol	27043	28	29	22.86	1	2	1	0	1	3.2	4.7	29.6	0.21	29	0.34	22	0.3	4606	255.889	0.85	8.3	150	0	9	1350	1	18	16	14	14	6	0.428571	14	6	0.428571	4	1	5	4BB	4	B	B	1	1	1	1	0
4	2018-06-11 10:31:00	prolonged protocol	16840	29	30	20.55	1	5	3	0	1	8.4	4.9	29.33	0.31	15	0.27	22	0.75	4610	192.083	1.31	8.5	100	0	11	1350	1	24	22	22	22	9	0.409091	22	14	0.636364	9	1	5	4AB	4	A	B	1	1	1	1	0
4	2016-10-14 09:01:00	prolonged protocol	17592	25	25	23.81	0	2	1	0	0	10.5	7.63	50.1	0.73	12	0.54	27	0.8	4612	219.619	0.98	10.5	150	1	12	2775	1	21	17	17	18	7	0.388889	16	4	0.25	2	1	5	4AB	4	A	B	1	1	1	0	1
4	2017-07-14 08:12:00	prolonged protocol	20280	28	27	21.21	0	2	3	0	0	4.21	6.47	46.73	0.86	21	0.36	17	0.52	4655	155.167	0.88	14.8	150	0	12	1875	1	30	21	21	21	6	0.285714	21	9	0.428571	1	1	5	4AB	4	A	B	1	0	2	0	0
4	2017-07-29 10:25:00	prolonged protocol	22572	26	33	18.2	0	5	3	0	0	4.53	5.66	29.15	0.29	15	0.31	24	0.63	4670	222.381	0.72	10	100	0	12	1125	2	21	14	14	15	7	0.466667	15	7	0.466667	3	1	5	4AA	4	A	A	1	1	1	1	0
4	2017-06-30 09:46:00	prolonged protocol	22025	30	30	18.03	1	3	3	0	0	7.51	7.33	59.79	0.47	28	0.49	15	0.64	4704	247.579	0.91	8.8	225	0	8	1725	1	19	14	14	16	10	0.625	16	9	0.5625	2	1	5	4AB	4	A	B	1	1	1	1	0
4	2018-07-23 09:02:00	prolonged protocol	28314	28	28	18.13	0	2	2	0	1	4.56	5.03	61.52	0.95	13	0.26	27	0.55	4734	315.6	0.37	13.9	150	0	10	1275	1	15	9	9	10	2	0.2	10	3	0.3	2	1	5	4BC	4	B	C	1	1	1	1	0
4	2017-05-08 11:22:00	prolonged protocol	21154	29	30	21.78	1	3	3	0	0	1.95	5.26	44.84	0.29	36	0.48	9	0.31	4755	216.136	0.71	14	225	1	10	2138	1	22	18	18	18	8	0.444444	18	9	0.5	9	1	5	4AA	4	A	A	1	0	2	0	0
4	2017-03-01 10:10:00	prolonged protocol	19942	24	30	27.18	1	1	3	0	1	5.45	4.87	44.12	0.54	23	0.68	32	0.61	4843	220.136	0.9	16.3	112.5	0	10	1275	1	22	13	13	14	7	0.5	14	9	0.642857	5	1	5	4AA	4	A	A	1	0	2	0	0
4	2018-08-13 14:01:00	prolonged protocol	28720	35	29	22.43	1	4	1	0	0	5.17	5.99	29.98	0.39	15	0.24	17	0.7	4854	373.385	1.05	12.2	225	0	15	3450	1	13	12	12	12	5	0.416667	12	5	0.416667	2	1	5	4BA	4	B	A	1	0	2	0	0
4	2017-06-27 08:53:00	prolonged protocol	21930	28	27	21.64	1	1	3	1	1	12.1	6.45	96.38	0.91	32	0.32	31	1.34	4861	373.923	1.2	8.4	150	0	9	1200	1	13	11	11	12	11	0.916667	12	9	0.75	2	1	5	4AC	4	A	C	1	1	1	1	0
4	2018-03-30 11:04:00	prolonged protocol	26025	29	35	20.69	1	1	1	0	0	2.71	8.46	43.72	0.17	31	0.21	16	0.22	4869	304.312	0.81	8.2	150	0	12	2400	1	16	16	16	16	10	0.625	16	11	0.6875	5	1	5	4BB	4	B	B	1	1	1	1	0
4	2016-12-05 15:28:00	prolonged protocol	14507	32	40	20.57	1	1	1	0	0	15.43	5.66	46.51	0.29	13	0.62	15	1.02	4869	324.6	1.15	8.8	150	0	10	1725	1	15	11	11	11	5	0.454545	11	8	0.727273	5	1	5	4BA	4	B	A	1	1	1	0	1
4	2017-10-23 08:53:00	prolonged protocol	23907	26	29	24.09	1	1	3	0	0	9.69	10.61	54.33	0.37	41	0.55	20	2.6	4883	305.188	0.72	14.3	100	1	8	1075	1	16	15	13	14	4	0.285714	14	7	0.5	2	1	5	5BB	5	B	B	1	0	2	0	0
4	2017-07-24 09:19:00	prolonged protocol	22444	31	34	18.36	1	7	3	1	0	3.48	7.57	55.33	0.4	37	0.36	13	0.34	4894	287.882	1.46	9.6	225	1	12	2400	1	17	14	14	14	5	0.357143	14	8	0.571429	4	1	5	4AB	4	A	B	1	1	1	1	0
4	2017-06-14 15:13:00	prolonged protocol	21739	26	31	21.45	0	6	3	0	0	4.71	6.06	104.71	0.44	50	0.33	21	0.8	4925	197	0.88	10	150	0	10	1725	1	25	18	18	20	8	0.4	20	11	0.55	5	1	5	4BA	4	B	A	1	1	1	1	0
4	2018-09-27 15:03:00	prolonged protocol	29435	25	26	22.66	1	1	2	0	1	9.98	7.35	52.6	0.37	16	0.65	24	0.86	4927	351.929	0.77	9.7	112.5	0	11	1350	2	14	10	10	11	5	0.454545	11	4	0.363636	2	1	5	4AB	4	A	B	1	1	1	1	0
4	2017-04-10 15:17:00	prolonged protocol	20677	33	29	23.44	1	1	1	0	0	5.8	8.5	47.53	0.38	12	0.4	11	0.07	4931	273.944	0.75	14.7	225	0	12	2213	1	18	16	14	14	10	0.714286	14	9	0.642857	5	1	5	4AA	4	A	A	1	1	1	1	0
4	2018-05-03 09:11:00	prolonged protocol	26667	26	29	20.89	0	6	1	0	0	4.1	8.93	53.2	0.99	24	0.22	18	0.7	5033	1006.6	0.44	13	150	0	11	1875	1	5	4	4	4	3	0.75	4	3	0.75	2	1	5	4BB	4	B	B	1	0	2	0	0
4	2018-08-24 09:23:00	prolonged protocol	28898	26	28	16.44	1	1	3	0	0	4.15	5.63	46.01	0.2	29	0.23	19	0.22	5096	318.5	0.67	10.9	150	0	10	1425	1	16	9	9	11	5	0.454545	11	7	0.636364	2	1	5	4AB	4	A	B	1	1	1	1	0
4	2018-06-15 10:36:00	prolonged protocol	27565	25	26	23.31	0	4	1	0	1	6.01	8.22	24.93	0.95	12	0.41	32	0.34	5103	283.5	0.43	16	100	0	12	1313	1	18	10	10	13	12	0.923077	13	11	0.846154	5	1	5	4BB	4	B	B	1	1	1	1	0
4	2018-08-30 08:25:00	prolonged protocol	28989	32	41	24.77	1	3	1	0	0	5.52	9.39	40.22	0.15	12	0.43	17	0.33	5138	321.125	0.7	10.4	225	1	11	2325	1	16	9	9	9	4	0.444444	9	4	0.444444	2	1	5	4BB	4	B	B	1	1	1	1	0
4	2016-11-08 14:45:00	prolonged protocol	18573	29	29	18.83	1	2	3	0	0	1.54	3.27	90.8	0.36	42	0.58	24	0.75	5199	236.318	1.12	13.1	150	0	11	1500	1	22	13	13	15	9	0.6	13	9	0.692308	3	1	5	4AB	4	A	B	1	1	1	1	0
4	2018-04-26 09:34:00	prolonged protocol	26534	32	33	17.19	1	4	3	0	0	5.78	10.29	52.71	0.58	25	0.37	11	0.98	5238	582	0.66	9.2	300	0	12	3600	2	9	5	5	5	2	0.4	5	2	0.4	1	1	5	4BB	4	B	B	1	1	1	1	0
4	2018-09-12 08:19:00	prolonged protocol	25815	29	33	20.94	0	2	1	0	0	5.1	3.22	24.95	0.43	41	0.67	20	0.74	5238	249.429	1.23	11.6	225	0	10	2250	1	21	20	20	20	2	0.1	20	9	0.45	2	1	5	4AB	4	A	B	1	1	1	1	0
4	2018-04-08 09:56:00	prolonged protocol	26173	28	30	19.68	1	1	2	0	0	5.59	10.34	53.26	0.45	12	0.24	19	0.91	5259	350.6	0.8	9.5	100	0	12	1575	1	15	14	14	15	7	0.466667	15	7	0.466667	5	1	5	4BB	4	B	B	1	1	1	1	0
4	2017-12-23 12:16:00	prolonged protocol	24825	35	34	20.96	1	10	1	0	0	5.67	5.41	52.72	0.23	15	0.38	18	0.64	5261	292.278	1.14	12.7	300	0	12	3225	1	18	15	15	15	10	0.666667	15	8	0.533333	5	1	5	4AB	4	A	B	1	1	1	1	0
4	2017-08-21 11:04:00	prolonged protocol	22925	23	28	21.19	0	3	4	0	0	3.17	7.21	64.61	0.62	12	0.31	25	1.35	5277	527.7	0.36	11.4	100	0	14	1400	1	10	8	8	9	5	0.555556	9	8	0.888889	7	1	5	5AB	5	A	B	1	1	1	1	0
4	2017-07-04 14:02:00	prolonged protocol	21921	27	28	25.78	0	1	2	0	0	2.03	6.09	44.24	0.26	17	0.3	17	0.49	5343	222.625	0.4	10.3	225	0	12	2550	1	24	20	19	18	5	0.277778	18	7	0.388889	4	1	5	4AB	4	A	B	1	1	1	1	0
4	2017-06-30 14:23:00	prolonged protocol	22045	24	26	19.92	1	1	3	0	1	8.27	6.73	74.22	0.27	29	0.38	29	0.37	5402	415.538	1.02	7.4	87.5	0	10	975	1	13	9	9	9	6	0.666667	9	6	0.666667	4	1	5	4BA	4	B	A	1	0	2	0	0
4	2017-11-23 09:09:00	prolonged protocol	24370	27	31	20.28	1	1	1	0	0	2.88	5.63	26.74	0.36	13	0.52	18	0.27	5450	160.294	1.22	13.3	200	0	11	2025	1	34	13	13	13	3	0.230769	13	5	0.384615	1	1	5	3AB	3	A	B	1	1	1	1	0
4	2018-07-27 14:19:00	prolonged protocol	26249	29	35	20.07	0	1	1	1	0	4.91	7.19	65.32	0.66	34	0.37	24	2.5	5462	321.294	0.6	12	150	0	10	1675	1	17	13	13	14	11	0.785714	14	12	0.857143	11	1	5	4BB	4	B	B	1	0	2	0	0
4	2016-08-08 15:05:00	prolonged protocol	17285	27	28	17.31	0	4	2	0	0	3.38	6.12	64	0.42	24	0.74	26	0.66	5531	230.458	0.85	12.4	150	0	10	1725	2	24	15	15	15	10	0.666667	11	6	0.545455	1	1	5	3AB	3	A	B	1	1	1	1	0
4	2018-01-26 14:00:00	prolonged protocol	25265	31	33	19.72	1	1	1	0	0	4.44	5.51	44.11	0.36	18	0.41	18	0.98	5616	330.353	1.37	14.1	187.5	0	12	2513	1	17	12	12	14	10	0.714286	14	10	0.714286	6	1	5	4AB	4	A	B	1	1	1	1	0
4	2017-11-28 13:53:00	prolonged protocol	24451	32	35	21.09	0	4	1	0	0	6.69	6.66	26.45	0.53	18	0.62	15	0.78	5769	524.455	1.45	9.6	200	0	11	2050	1	11	7	7	7	4	0.571429	7	5	0.714286	3	1	5	4AB	4	A	B	1	1	1	1	0
4	2017-09-01 14:10:00	prolonged protocol	23109	34	38	19.56	1	1	1	0	0	6.08	6.97	61.81	0.6	35	0.22	20	1.02	5810	363.125	0.59	7.8	225	0	10	2175	1	16	11	11	11	6	0.545455	11	9	0.818182	4	1	5	4AB	4	A	B	1	0	2	0	0
4	2018-08-16 09:25:00	prolonged protocol	28776	31	34	27.55	1	7	1	0	1	11.02	5.23	40.11	0.77	16	0.29	30	0.49	6035	317.632	0.7	11.4	175	0	10	1550	1	19	16	16	17	5	0.294118	17	5	0.294118	0	1	5	4BC	4	B	C	1	1	1	1	0
4	2018-04-05 10:51:00	prolonged protocol	26150	23	26	19.53	1	2	2	0	0	4	5.8	43.9	0.48	14	0.49	26	1.81	6184	294.476	1.19	10.8	100	0	14	1400	2	21	20	20	20	7	0.35	20	13	0.65	10	1	5	4BB	4	B	B	1	1	1	1	0
4	2017-11-09 08:32:00	prolonged protocol	22882	35	39	20.7	1	1	3	0	0	6.27	7.18	30.9	0.33	16	0.38	22	0.25	6526	326.3	1.48	15.4	225	0	11	2475	1	20	14	13	13	8	0.615385	13	9	0.692308	5	1	5	4AB	4	A	B	1	1	1	0	1
[truncated: 16 more columns]
