# Supplementary material for: Clinical and perinatal outcomes of fresh single-blastocyst-transfer cycles under an early follicular phase prolonged protocol according to day of trigger estradiol levels
Source: PeerJ journal article supplement (doi:10.7717/peerj.11785), 2021-07-26

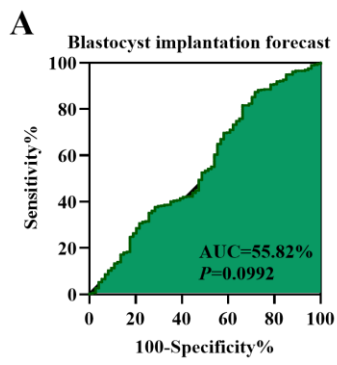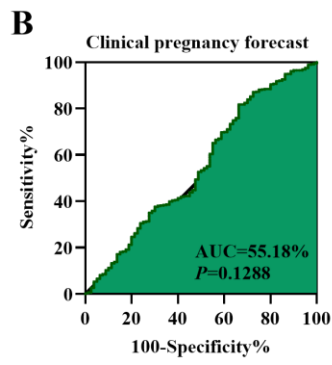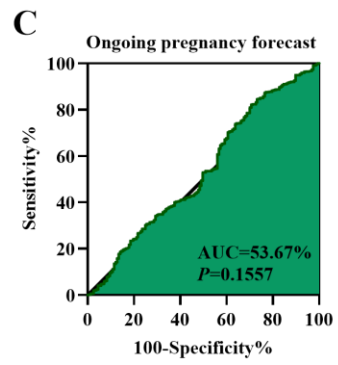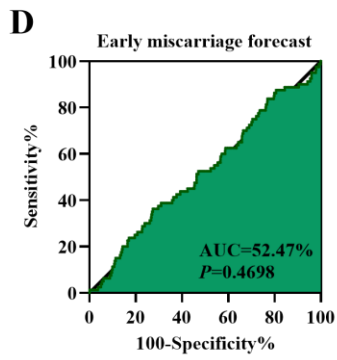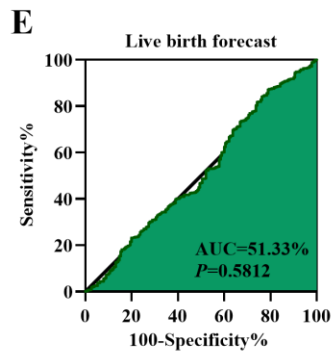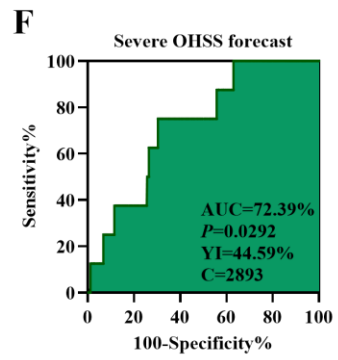

Supplement: supplementary_Fig._1_ROC_curves_analysis.pdf [file supplementary_Fig._1_ROC_curves_analysis.pdf]
